# Supplementary material
Source: PubMed Central journal article supplement (PMC5028193)
Supplement: NIHMS815997-supplement-Fig__S1-3.pdf [file NIHMS815997-supplement-Fig__S1-3.pdf]

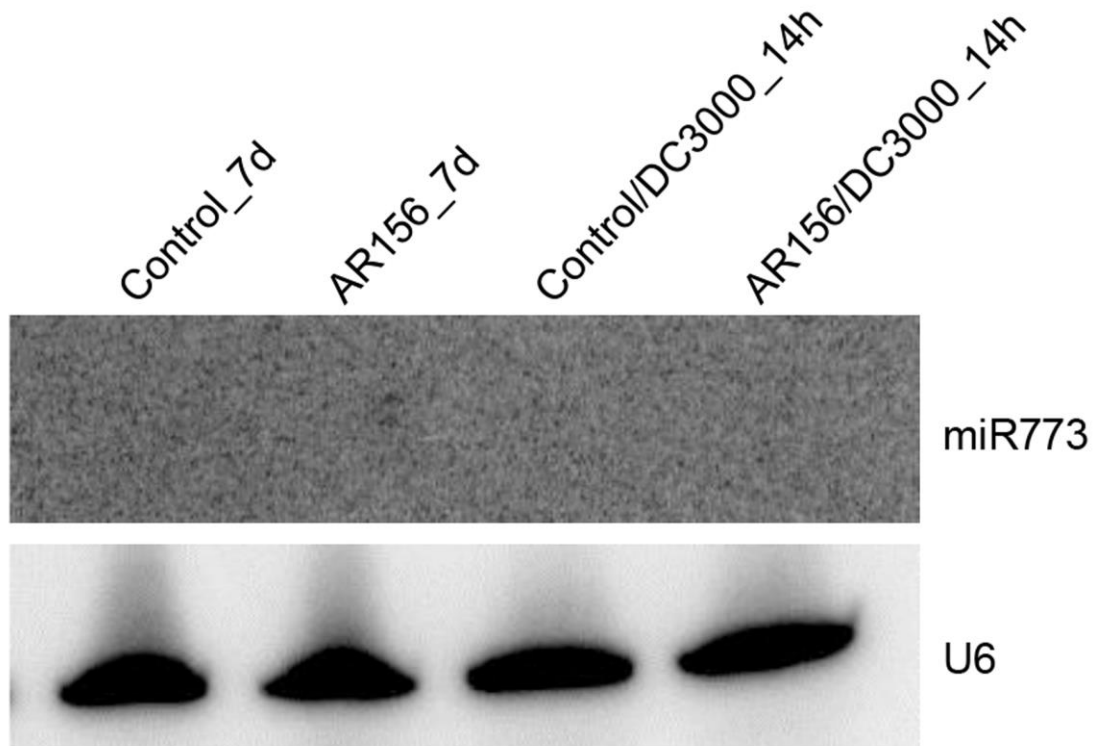

Figure S1. Expression of miR773 after AR156 treatment and Pst DC3000 inoculation. Plants are pre-treated with AR156 at  $5 \times 10^7$  CFU/mL and 0.85% NaCl for seven days, respectively. Leaves are spray inoculated with Pst DC3000 cell suspension at  $1 \times 10^8$  CFU/mL concentration. Total RNA is extracted from leaves with line numbers and time points indicated. RNA blots are hybridized with DNA oligonucleotide probes complementary to the indicated miRNAs. U6 is used as a loading control.

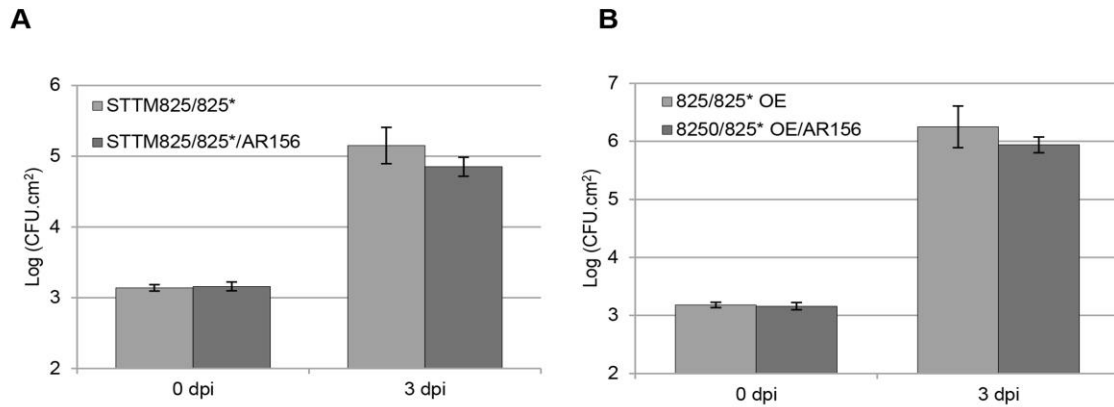

Figure S2. miR825/825\* knockdown and overexpression diminish response to AR156 priming (A) AR156-mediated ISR in Col-0 and STTM825/825\* transgenic plants. (B) AR156-mediated ISR in Col-0 and transgenic plants over-expressing miR825/825\*. Plants pre-treated with AR156 at  $5 \times 10^7$  CFU/mL and 0.85% NaCl for 7 days, respectively. Leaves are spray inoculated with Pst DC3000 cell suspension at  $1 \times 10^8$  CFU/mL concentration. ISR is measured by counting colonies on plates 3 days after inoculation (dpi). Error bars represent standard deviation for at least 12 leaf discs.

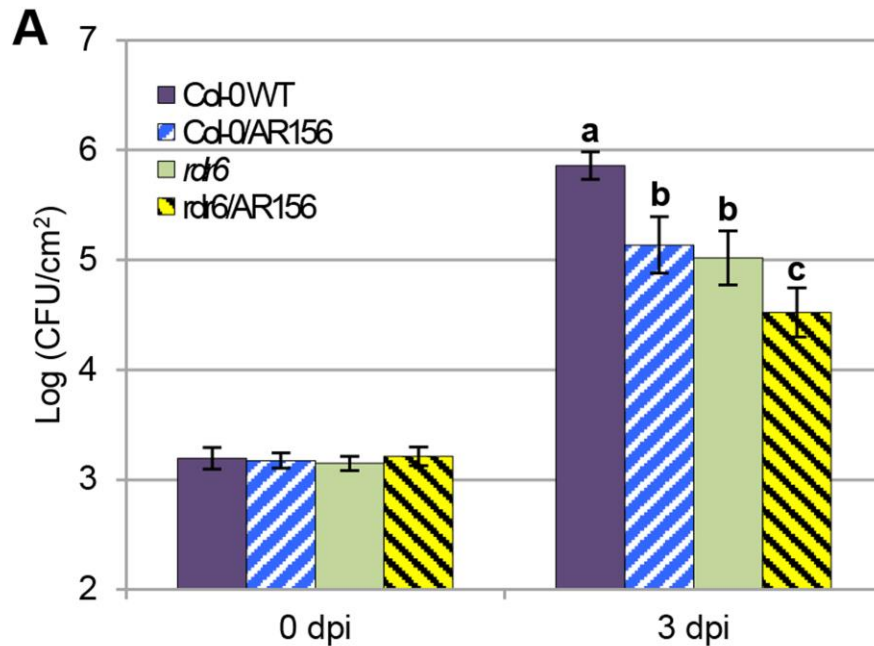

**B**

| Treatment    | Average | Significance  |               |
|--------------|---------|---------------|---------------|
|              |         | p-value <0.01 | p-value <0.05 |
| Col-0 WT     | 5.8600  | A             | a             |
| Col-0 /AR156 | 5.1367  | B             | b             |
| rdr6         | 5.0167  | B             | b             |
| rdr6 /AR156  | 4.5233  | B             | c             |

**Figure S3.** AR156-induced ISR to *Pst* DC3000 is partially dependent on RDR6 (A) AR156-induced ISR is measured in wild type and *rdr6* mutant plants. *Arabidopsis* Col-0 and *rdr6* mutant plants are pre-treated with AR156 at  $5 \times 10^7$  CFU/mL and 0.85% NaCl for 7 days, respectively. Leaves are spray inoculated with *Pst* DC3000 cell suspension at  $1 \times 10^8$  CFU/mL concentration. ISR is measured by counting colonies on plates 3 days after inoculation (dpi). Error bars represent standard deviation for at least 12 leaf discs. Statistical difference among samples is represented by using letters: different letters (a, b, and c) represent significant difference ( $P < 0.05$ ) while same letters represent insignificant differences ( $P > 0.05$ ). (B) The statistical value is listed in a table. Value in the 3<sup>rd</sup> column corresponds to Figure 5A.
