# Supplementary material
Source: PubMed Central journal article supplement (PMC5028193)
Supplement: NIHMS815997-supplement-Table_S1-3.pdf [file NIHMS815997-supplement-Table_S1-3.pdf]

Table S1. Summary of miRNAs identified in this research.

| <b>miRNA</b>    | <b>Control_7d</b> | <b>AR156_7d</b> | <b>Control/<br/>DC3000_14h</b> | <b>AR156/<br/>DC3000_14h</b> |
|-----------------|-------------------|-----------------|--------------------------------|------------------------------|
| ath-miR1888b    | 15.49             | 0.00            | 188.71                         | 0.00                         |
| ath-miR5020a    | 0.00              | 0.00            | 53.78                          | 0.00                         |
| ath-miR841b*    | 27.54             | 0.00            | 56.71                          | 0.00                         |
| ath-miR5639     | 6.02              | 0.00            | 40.09                          | 0.00                         |
| ath-miR169g     | 119.62            | 0.00            | 34.22                          | 0.00                         |
| ath-miR852      | 34.42             | 24.36           | 62.58                          | 0.00                         |
| ath-miR167c     | 299.47            | 138.86          | 0.98                           | 0.00                         |
| ath-miR3932b    | 95.52             | 21.11           | 7.82                           | 0.00                         |
| ath-miR864-3p   | 76.59             | 63.34           | 95.82                          | 0.00                         |
| ath-miR169c     | 316.68            | 194.90          | 44.00                          | 0.00                         |
| ath-miR5663     | 69.70             | 0.81            | 173.06                         | 0.00                         |
| ath-miR5644     | 0.00              | 0.00            | 11.73                          | 0.00                         |
| ath-miR853      | 88.64             | 116.13          | 64.53                          | 0.00                         |
| ath-miR5652     | 439.74            | 142.92          | 95.82                          | 0.00                         |
| ath-miR399f     | 38.72             | 0.00            | 4.89                           | 0.00                         |
| ath-miR169d     | 119.62            | 0.00            | 34.22                          | 0.00                         |
| ath-miR2934-5p  | 12.05             | 0.00            | 57.69                          | 0.00                         |
| ath-miR3932a    | 95.52             | 21.11           | 7.82                           | 0.00                         |
| ath-miR169b     | 316.68            | 194.90          | 44.00                          | 0.00                         |
| ath-miR861-3p   | 834.72            | 43.85           | 62.58                          | 0.00                         |
| ath-miR5659     | 35.28             | 0.00            | 60.62                          | 0.00                         |
| ath-miR169e     | 119.62            | 0.00            | 34.22                          | 0.00                         |
| ath-miR5640     | 24.10             | 0.00            | 146.66                         | 0.00                         |
| ath-miR169f     | 119.62            | 0.00            | 34.22                          | 0.00                         |
| ath-miR848      | 120.48            | 165.66          | 374.48                         | 1.03                         |
| ath-miR773      | 83.47             | 0.81            | 67.46                          | 1.03                         |
| ath-miR5629     | 72.29             | 123.43          | 44.98                          | 1.03                         |
| ath-miR864-5p   | 96.38             | 114.50          | 132.97                         | 3.10                         |
| ath-miR3440b-3p | 11.19             | 0.00            | 31.29                          | 1.03                         |
| ath-miR5024-5p  | 0.00              | 0.00            | 28.35                          | 1.03                         |
| ath-miR156h     | 55.94             | 0.00            | 24.44                          | 1.03                         |
| ath-miR863-3p   | 440.60            | 166.47          | 796.86                         | 79.52                        |
| ath-miR825-5p   | 137.52            | 136.83          | 341.23                         | 76.43                        |
| ath-miR847      | 525.79            | 36.54           | 1282.80                        | 300.54                       |
| ath-miR395a     | 132.52            | 142.11          | 736.24                         | 179.70                       |
| ath-miR5653     | 462.11            | 461.25          | 140.80                         | 53.70                        |
| ath-miR395b     | 413.92            | 182.71          | 813.49                         | 312.93                       |
| ath-miR860      | 74.01             | 38.17           | 179.91                         | 96.05                        |
| ath-miR399b     | 83.47             | 0.00            | 162.31                         | 86.75                        |
| ath-miR5020b    | 161.78            | 33.29           | 1075.52                        | 622.77                       |
| ath-miR447      | 2434.47           | 3839.44         | 3298.92                        | 1961.25                      |
| ath-miR841b     | 12.91             | 0.00            | 207.28                         | 126.00                       |
| ath-miR841      | 191.04            | 48.72           | 1696.39                        | 1084.42                      |
| ath-miR167d     | 160993.23         | 98887.53        | 133588.69                      | 90855.74                     |
| ath-miR164c     | 3040.29           | 394.66          | 602.29                         | 438.93                       |
| ath-miR163      | 9359.23           | 12958.11        | 17083.21                       | 12729.02                     |

|               |            |           |           |           |
|---------------|------------|-----------|-----------|-----------|
| ath-miR447a.2 | 11536.40   | 7238.74   | 9473.40   | 7967.90   |
| ath-miR396a   | 133571.27  | 37361.46  | 107132.79 | 90866.07  |
| ath-miR781    | 201.37     | 160.79    | 437.05    | 398.65    |
| ath-miR822    | 53582.37   | 9563.68   | 2585.16   | 2398.12   |
| ath-miR846    | 734.04     | 278.54    | 2329.97   | 2161.61   |
| ath-miR173    | 4180.50    | 1829.58   | 5966.22   | 5632.78   |
| ath-miR161.1  | 202453.18  | 409385.26 | 193664.44 | 183321.58 |
| ath-miR159a   | 598898.72  | 362054.89 | 685703.24 | 669840.57 |
| ath-miR840    | 3413.76    | 1433.29   | 1391.33   | 1415.94   |
| ath-miR390    | 17919.88   | 7507.54   | 9537.93   | 9765.97   |
| ath-miR157    | 119227.79  | 59429.32  | 483871.68 | 498682.04 |
| ath-miR5026   | 34388.03   | 9858.46   | 3894.37   | 4093.94   |
| ath-miR396b   | 169956.62  | 32263.32  | 84941.83  | 92298.53  |
| ath-miR171a   | 2696.07    | 736.54    | 2012.20   | 2228.74   |
| ath-miR823    | 1853.60    | 1827.15   | 6568.51   | 7406.07   |
| ath-miR167    | 1744874.46 | 823936.88 | 151563.60 | 171346.50 |
| ath-miR164    | 33690.13   | 11899.99  | 19748.55  | 22660.23  |
| ath-miR172    | 4458.46    | 1851.51   | 5677.78   | 6701.71   |
| ath-miR169    | 322.70     | 176.22    | 211.19    | 252.00    |
| ath-miR850    | 523.21     | 764.96    | 143.73    | 173.51    |
| ath-miR159b   | 491585.96  | 321583.22 | 769013.21 | 973741.31 |
| ath-miR777    | 561.07     | 590.37    | 90.93     | 116.70    |
| ath-miR5642   | 18.93      | 0.00      | 80.18     | 103.28    |
| ath-miR472    | 3214.12    | 2803.25   | 4681.46   | 6032.47   |
| ath-miR5012   | 152.32     | 52.78     | 138.84    | 180.74    |
| ath-miR1888   | 1357.07    | 617.17    | 1206.54   | 1670.01   |
| ath-miR168    | 42414.29   | 37657.05  | 36271.51  | 50407.94  |
| ath-miR863-5p | 45.61      | 0.00      | 165.24    | 230.31    |
| ath-miR162    | 26801.51   | 4597.10   | 20406.57  | 28864.14  |
| ath-miR172e   | 117.03     | 52.78     | 70.40     | 102.25    |
| ath-miR156e   | 23883.42   | 3945.01   | 11763.28  | 17336.25  |
| ath-miR156    | 23883.42   | 3945.01   | 11763.28  | 17336.25  |
| ath-miR169a   | 38411.92   | 6634.57   | 1685.64   | 2489.00   |
| ath-miR156j   | 101.54     | 16.24     | 73.33     | 109.47    |
| ath-miR157d   | 9441.84    | 1656.61   | 6472.69   | 10401.13  |
| ath-miR843    | 1348.47    | 1277.38   | 8430.14   | 13619.27  |
| ath-miR403    | 18745.14   | 2726.10   | 9811.70   | 16367.50  |
| ath-miR825-3p | 681.89     | 1120.62   | 159.53    | 42.84     |
| ath-miR824    | 16303.79   | 9851.15   | 76733.64  | 129300.98 |
| ath-miR156g   | 104.13     | 29.23     | 76.26     | 129.10    |
| ath-miR400    | 5960.96    | 1960.32   | 122.22    | 207.59    |
| ath-miR833-5p | 152.32     | 341.88    | 132.97    | 236.51    |
| ath-miR5634   | 222.88     | 153.48    | 145.68    | 266.46    |
| ath-miR171    | 6349.06    | 2238.05   | 1229.03   | 2325.82   |
| ath-miR838    | 931.10     | 677.26    | 243.46    | 508.13    |
| ath-miR166    | 272530.38  | 101996.11 | 72633.94  | 156076.84 |
| ath-miR397b   | 2510.19    | 1784.92   | 129.06    | 279.88    |
| ath-miR5651   | 318.40     | 228.19    | 165.24    | 360.44    |
| ath-miR161.2  | 18745.14   | 5361.25   | 2829.60   | 6856.63   |
| ath-miR408    | 6898.09    | 3491.07   | 1645.55   | 4012.35   |

|                |           |          |          |           |
|----------------|-----------|----------|----------|-----------|
| ath-miR391     | 4280.33   | 792.57   | 747.00   | 1919.94   |
| ath-miR866-3p  | 314.10    | 1.62     | 116.35   | 315.00    |
| ath-miR827     | 431.13    | 61.72    | 62.58    | 171.44    |
| ath-miR3434    | 33.56     | 0.00     | 101.69   | 287.11    |
| ath-miR1886.2  | 947.45    | 531.09   | 65.51    | 185.90    |
| ath-miR844*    | 753.83    | 119.37   | 123.20   | 373.87    |
| ath-miR160     | 3813.05   | 1461.72  | 3833.75  | 12828.16  |
| ath-miR159c    | 9000.39   | 3344.89  | 1419.69  | 4764.22   |
| ath-miR165     | 22617.57  | 7995.59  | 4489.82  | 16407.78  |
| ath-miR865-5p  | 112.73    | 41.42    | 28.35    | 110.51    |
| ath-miR844     | 1160.01   | 73.09    | 63.55    | 253.03    |
| ath-miR319c    | 6625.30   | 664.27   | 2072.83  | 8883.98   |
| ath-miR858b    | 212.55    | 245.24   | 114.40   | 588.68    |
| ath-miR837-5p  | 7.74      | 0.00     | 14.67    | 81.59     |
| ath-miR158a    | 349637.34 | 29318.78 | 99445.74 | 593309.50 |
| ath-miR775     | 1149.68   | 52.78    | 275.72   | 1721.64   |
| ath-miR398b    | 24408.35  | 8167.74  | 751.89   | 5138.08   |
| ath-miR172b*   | 3419.79   | 993.15   | 120.26   | 853.08    |
| ath-miR158b    | 1721.94   | 64.97    | 367.63   | 2996.10   |
| ath-miR5654    | 703.06    | 35.73    | 57.69    | 550.47    |
| ath-miR319     | 19203.81  | 1313.11  | 863.35   | 10989.81  |
| ath-miR779.2   | 210.83    | 41.42    | 19.55    | 269.56    |
| ath-miR858     | 229.76    | 488.86   | 46.93    | 705.39    |
| ath-miR393b    | 15241.88  | 283.41   | 327.55   | 6807.05   |
| ath-miR2112-3p | 232.35    | 0.00     | 10.76    | 265.42    |
| ath-miR398a    | 2147.05   | 687.01   | 32.27    | 803.50    |
| ath-miR394     | 427.69    | 57.66    | 19.55    | 1422.14   |
| ath-miR172     | 99.82     | 0.00     | 1.96     | 178.67    |
| ath-miR2111b   | 6.02      | 52.78    | 0.00     | 0.00      |
| ath-miR5658    | 16.35     | 0.00     | 0.00     | 0.00      |
| ath-miR833-3p  | 12.91     | 63.34    | 0.00     | 0.00      |
| ath-miR771     | 12.05     | 0.00     | 0.00     | 63.00     |
| ath-miR5643b   | 129.08    | 85.27    | 0.00     | 0.00      |
| ath-miR5024-3p | 24.96     | 32.48    | 0.00     | 0.00      |
| ath-miR5014-3p | 50.77     | 0.00     | 0.00     | 0.00      |
| ath-miR833b    | 28.40     | 18.68    | 0.00     | 0.00      |
| ath-miR5648-5p | 43.89     | 0.00     | 0.00     | 0.00      |
| ath-miR402     | 31.84     | 0.00     | 0.00     | 0.00      |
| ath-miR3933    | 50.77     | 35.73    | 0.00     | 0.00      |
| ath-miR859     | 18.93     | 0.00     | 0.00     | 1.03      |
| ath-miR842     | 176.41    | 0.81     | 0.00     | 84.69     |
| ath-miR830     | 30.98     | 32.48    | 0.00     | 0.00      |
| ath-miR851-5p  | 13.77     | 0.00     | 0.00     | 0.00      |
| ath-miR5643a   | 129.08    | 85.27    | 0.00     | 0.00      |
| ath-miR5635d   | 3.44      | 0.00     | 0.00     | 0.00      |
| ath-miR829.1   | 54.21     | 0.00     | 0.00     | 0.00      |
| ath-miR3434*   | 109.29    | 61.72    | 0.00     | 0.00      |
| ath-miR837-3p  | 145.43    | 41.42    | 0.00     | 0.00      |
| ath-miR830*    | 257.30    | 54.41    | 0.00     | 196.23    |
| ath-miR1886.1  | 33.56     | 38.17    | 0.00     | 0.00      |

|                 |        |        |      |        |
|-----------------|--------|--------|------|--------|
| ath-miR3440b-5p | 20.65  | 0.00   | 0.00 | 0.00   |
| ath-miR5637     | 0.00   | 27.61  | 0.00 | 0.00   |
| ath-miR397a     | 427.69 | 321.58 | 0.00 | 0.00   |
| ath-miR862-5p   | 305.49 | 203.83 | 0.00 | 0.00   |
| ath-miR5014-5p  | 21.51  | 0.00   | 0.00 | 0.00   |
| ath-miR869.2    | 33.56  | 32.48  | 0.00 | 57.84  |
| ath-miR829.2    | 26.68  | 0.00   | 0.00 | 0.00   |
| ath-miR845a     | 98.96  | 0.00   | 0.00 | 0.00   |
| ath-miR839      | 370.89 | 0.00   | 0.00 | 85.72  |
| ath-miR2111a    | 6.02   | 52.78  | 0.00 | 0.00   |
| ath-miR780.2    | 16.35  | 0.00   | 0.00 | 0.00   |
| ath-miR2112-5p  | 103.26 | 1.62   | 0.00 | 0.00   |
| ath-miR857      | 30.12  | 0.00   | 0.00 | 0.00   |
| ath-miR5020c    | 15.49  | 30.86  | 0.00 | 0.00   |
| ath-miR1886.3   | 23.23  | 0.00   | 0.00 | 0.00   |
| ath-miR831      | 0.00   | 78.77  | 0.00 | 0.00   |
| ath-miR828      | 234.93 | 223.32 | 0.00 | 99.15  |
| ath-miR170      | 721.99 | 160.79 | 0.00 | 202.42 |
| ath-miR5028     | 0.00   | 47.91  | 0.00 | 91.92  |
| ath-miR835-5p   | 19.79  | 0.00   | 0.00 | 0.00   |
| ath-miR849      | 46.47  | 86.89  | 0.00 | 0.00   |

Note: miRNAs identified in this research are listed. Reads are normalized to library size and presented in read per million (RPM).

Table S2: Summary of predicted genes targeted by miRNAs with significant differential expression.

| <b>ID</b>     | <b>Target</b> | <b>Target Description</b>                                                            |
|---------------|---------------|--------------------------------------------------------------------------------------|
| ath-miR848    | AT1G33790     | jacalin lectin family protein                                                        |
|               | AT1G66960     | Terpenoid cyclases family protein                                                    |
| ath-miR773    | AT4G14140     | MET2, DMT02, DMT2, MET02   DNA methyltransferase 2                                   |
|               | AT4G08990     | DNA (cytosine-5-)-methyltransferase family protein                                   |
|               | AT5G45200     | Disease resistance protein (TIR-NBS-LRR class) family                                |
|               | AT5G64270     | splicing factor, putative                                                            |
|               | AT1G64060     | ATRBOH F, ATRBOHF, RBOHAP108, RBOHF, RBOH F   respiratory burst oxidase protein F    |
|               | AT5G57350     | AHA3, ATAHA3, HA3   H(+)-ATPase 3                                                    |
|               | AT5G26150     | protein kinase family protein                                                        |
|               | AT1G79950     | RAD3-like DNA-binding helicase protein                                               |
|               | AT5G16680     | RING/FYVE/PHD zinc finger superfamily protein                                        |
|               | AT1G03080     | kinase interacting (KIP1-like) family protein                                        |
| ath-miR5629   | AT3G43083     | LCR33   low-molecular-weight cysteine-rich 33                                        |
| ath-miR864-5p | AT1G02840     | SR1, ATSRP34, SRP34, SR34, At-SR34   RNA-binding (RRM/RBD/RNP motifs) family protein |
|               | AT5G57450     | XRCC3, ATXRCC3   homolog of X-ray repair cross complementing 3 (XRCC3)               |
|               | AT1G09410     | pentatricopeptide (PPR) repeat-containing protein                                    |
| ath-miR863-3p | AT2G27100     | SE   C2H2 zinc-finger protein SERRATE (SE)                                           |
|               | AT2G29980     | FAD3   fatty acid desaturase 3                                                       |
|               | AT5G14750     | WER, ATMYB66, WER1, MYB66   myb domain protein 66                                    |
| ath-miR825*   | AT5G38850     | Disease resistance protein (TIR-NBS-LRR class)                                       |
|               | AT4G14370     | Disease resistance protein (TIR-NBS-LRR class) family                                |
|               | AT5G40920     | pseudogene, disease resistance protein (TIR-NBS-LRR class), putative                 |
|               | AT1G63750     | Disease resistance protein (TIR-NBS-LRR class) family                                |
|               | AT4G11170     | Disease resistance protein (TIR-NBS-LRR class) family                                |
|               | AT1G63740     | Disease resistance protein (TIR-NBS-LRR class) family                                |
|               | AT1G63730     | Disease resistance protein (TIR-NBS-LRR class) family                                |
|               | AT4G08450     | Disease resistance protein (TIR-NBS-LRR class) family                                |
|               | AT5G41550     | Disease resistance protein (TIR-NBS-LRR class) family                                |
|               | AT5G51630     | Disease resistance protein (TIR-NBS-LRR class) family                                |
|               | AT5G40910     | Disease resistance protein (TIR-NBS-LRR class) family                                |
|               | AT3G04220     | Disease resistance protein (TIR-NBS-LRR class) family                                |
|               | AT5G40060     | Disease resistance protein (NBS-LRR class) family                                    |
|               | AT1G66090     | Disease resistance protein (TIR-NBS class)                                           |
|               | AT5G18360     | Disease resistance protein (TIR-NBS-LRR class) family                                |
| ath-miR847    | AT2G15130     | Plant basic secretory protein (BSP) family protein                                   |
|               | AT1G74620     | RING/U-box superfamily protein                                                       |
|               | AT1G53340     | Cysteine/Histidine-rich C1 domain family protein                                     |
|               | AT3G61340     | F-box and associated interaction domains-containing protein                          |
| ath-miR395    | AT5G10180     | AST68, SULTR2;1   sulfate transporter 2;1   chr5                                     |
|               | AT4G23840     | Leucine-rich repeat (LRR) family protein                                             |
|               | AT2G21230     | Basic-leucine zipper (bZIP) transcription factor family protein                      |
|               | AT3G45630     | RNA binding (RRM/RBD/RNP motifs) family protein                                      |
|               | AT3G57300     | INO80, ATINO80   INO80 ortholog                                                      |
| ath-miR825    | AT5G55970     | RING/U-box superfamily protein                                                       |
|               | AT5G44940     | F-box/RNI-like superfamily protein                                                   |

|               |           |                                                                                                  |
|---------------|-----------|--------------------------------------------------------------------------------------------------|
| ath-miR844*   | AT3G46540 | ENTH/VHS family protein                                                                          |
|               | AT5G16880 | Target of Myb protein 1                                                                          |
| ath-miR160    | AT1G77850 | ARF17   auxin response factor 17                                                                 |
|               | AT2G28350 | ARF10   auxin response factor 10                                                                 |
|               | AT4G30080 | ARF16   auxin response factor 16                                                                 |
| ath-miR159c   | AT3G60460 | DUO1   myb-like HTH transcriptional regulator family protein                                     |
|               | AT2G26950 | AtMYB104, MYB104   myb domain protein 104                                                        |
|               | AT4G31240 | protein kinase C-like zinc finger protein                                                        |
| ath-miR165    | AT5G06350 | ARM repeat superfamily protein                                                                   |
|               | AT1G34575 | FAD-binding Berberine family protein                                                             |
|               | AT5G52620 | F-box associated ubiquitination effector family protein                                          |
|               | AT5G57035 | U-box domain-containing protein kinase family protein                                            |
| ath-miR865-5p | AT5G07140 | Protein kinase superfamily protein                                                               |
|               | AT1G51805 | Leucine-rich repeat protein kinase family protein                                                |
| ath-miR844    | AT4G26770 | Phosphatidate cytidyltransferase family protein                                                  |
|               | AT1G51480 | Disease resistance protein (CC-NBS-LRR class) family                                             |
| ath-miR319c   | AT2G31070 | TCP10TCP domain protein 10                                                                       |
|               | AT3G66658 | ALDH22A1   aldehyde dehydrogenase 22A1   chr3                                                    |
|               | AT2G26950 | AtMYB104, MYB104   myb domain protein 104                                                        |
|               | AT3G15030 | TCP4   TCP family transcription factor 4                                                         |
| ath-miR858b   | AT1G34670 | AtMYB93, MYB93   myb domain protein 93                                                           |
|               | AT5G35550 | TT2, ATMYB123, MYB123, ATTT2   Duplicated homeodomain-like superfamily protein                   |
|               | AT1G17760 | CSTF77, ATCSTF77   Tetratricopeptide repeat (TPR)-like superfamily protein                       |
| ath-miR158a   | AT3G03580 | Tetratricopeptide repeat (TPR)-like superfamily protein                                          |
|               | AT4G17565 | F-box family protein with a domain of unknown function (DUF295)                                  |
| ath-miR775    | AT1G53290 | Galactosyltransferase family protein                                                             |
|               | AT1G01040 | DCL1   dicer-like 1                                                                              |
|               | AT1G21245 | Protein kinase superfamily protein                                                               |
| ath-miR398b   | AT1G08830 | Encodes a cytosolic copper/zinc superoxide dismutase CSD1 that can detoxify superoxide radicals. |
|               | AT2G28190 | Encodes a chloroplastic copper/zinc superoxide dismutase CSD2 that can                           |
| ath-miR172b*  | AT2G16500 | ADC1, ARGDC1, ARGDC, SPE1   arginine decarboxylase 1                                             |
|               | AT3G57330 | ACA11   autoinhibited Ca <sup>2+</sup> -ATPase 11                                                |
|               | AT5G48410 | ATGLR1.3, GLR1.3   glutamate receptor 1.3                                                        |
| ath-miR158b   | AT2G46590 | DAG2   Dof-type zinc finger DNA-binding family protein                                           |
|               | AT3G03580 | Tetratricopeptide repeat (TPR)-like superfamily protein                                          |
| ath-miR5654   | AT1G52770 | Phototropic-responsive NPH3 family protein                                                       |
|               | AT3G21070 | NADK1, ATNADK-1   NAD kinase 1                                                                   |
|               | AT1G12300 | Tetratricopeptide repeat (TPR)-like superfamily protein                                          |
| ath-miR319    | AT2G26950 | AtMYB104, MYB104   myb domain protein 104                                                        |
|               | AT5G06100 | MYB33, ATMYB33   myb domain protein 33                                                           |
|               | AT5G67090 | Subtilisin-like serine endopeptidase family protein                                              |
| ath-miR779.2  | AT1G51300 | alpha/beta-Hydrolases superfamily protein                                                        |
|               | AT1G18370 | HIK, ATNACK1, NACK1   ATP binding microtubule motor family protein                               |
| ath-miR858    | AT2G26950 | AtMYB104, MYB104   myb domain protein 104                                                        |
|               | AT1G17760 | CSTF77, ATCSTF77   Tetratricopeptide repeat (TPR)-like superfamily protein                       |

|             |           |                                                          |
|-------------|-----------|----------------------------------------------------------|
| ath-miR393b | AT1G12820 | AFB3   auxin signaling F-box 3                           |
|             | AT3G26810 | AFB2   auxin signaling F-box 2                           |
|             | AT3G62980 | TIR1   F-box/RNI-like superfamily protein                |
| ath-miR398a | AT1G36078 | unknown protein; FUNCTIONS IN biological_process unknown |
| ath-miR394b | AT1G27340 | Galactose oxidase/kelch repeat superfamily protein       |
|             | AT4G20430 | Subtilase family protein                                 |
|             | AT1G01320 | Tetratricopeptide repeat (TPR)-like superfamily protein  |

---

Note: Prediction targets of miRNAs with significant expression alteration (Table 2) are listed, with gene ID, predicted function, and base-pairing patterns shown. A “:” represents a perfect match; a “.” represents a wobble (G: U pairs); a “ ”(a space) represents an imperfect match.

Table S3: siRNA aligned to the At5G38850 locus

| #. Reads | Strand | Position | Sequence (5' to 3')            | Length | Register |
|----------|--------|----------|--------------------------------|--------|----------|
| 3        | +      | 5        | AAACGCAATCTCTCACGACC           | 20     | 5        |
| 2        | +      | 46       | AACTTGGAGATACAACGTCTTCCC       | 24     | 4        |
| 3        | +      | 108      | CTCATTTACGTAAGCAGTTCAACTCAA    | 27     | 3        |
| 2        | +      | 118      | TAAGCAGTTCAACTCAAATGGG         | 22     | 13       |
| 4        | +      | 149      | TTTGATGATCAAGGAATCGAGAG        | 23     | 2        |
| 18       | +      | 221      | ATATCGATTGTGGTTCTTTCA          | 21     | 11       |
| 7        | +      | 253      | TTCTTCGAGTTGGTGCTTGAATGA       | 24     | 1        |
| 5        | +      | 283      | GGAGATTTTGAAATGCAAAGACGT       | 24     | 10       |
| 10       | +      | 284      | GAGATTTTGAAATGCAAAGA           | 20     | 11       |
| 13       | +      | 284      | GAGATTTTGAAATGCAAAGACGT        | 23     | 11       |
| 31       | +      | 284      | GAGATTTTGAAATGCAAAGAC          | 21     | 11       |
| 2        | +      | 285      | AGATTTTGAAATGCAAAGACG          | 21     | 12       |
| 16       | +      | 288      | TTTTGAAATGCAAAGACGTAGT         | 22     | 15       |
| 6        | +      | 291      | TGAAATGCAAAGACGTAGTGATGC       | 24     | 18       |
| 5        | +      | 292      | GAAATGCAAAGACGTAGTGAT          | 21     | 19       |
| 7        | +      | 293      | AAATGCAAAGACGTAGTGATG          | 21     | 20       |
| 237      | +      | 294      | AATGCAAAGACGTAGTGATGC          | 21     | 0        |
| 2        | +      | 296      | TGCAAAGACGTAGTGATGCCG          | 21     | 2        |
| 11       | +      | 298      | CAAAGACGTAGTGATGCCGAT          | 21     | 4        |
| 11       | +      | 304      | CGTAGTGATGCCGATCTTCTA          | 21     | 10       |
| 22       | +      | 305      | GTAGTGATGCCGATCTTCTAT          | 21     | 11       |
| 4        | +      | 305      | GTAGTGATGCCGATCTTCTATG         | 22     | 11       |
| 1419     | +      | 306      | TAGTGATGCCGATCTTCTATG          | 21     | 12       |
| 1        | +      | 306      | AGTGATGCCGATCTTCTATGAAGTAGATC  | 31     | 12       |
| 21       | +      | 306      | TAGTGATGCCGATCTTCTAT           | 20     | 12       |
| 240      | +      | 306      | TAGTGATGCCGATCTTCTATGA         | 22     | 12       |
| 6        | +      | 306      | TAGTGATGCCGATCTTCTATGAAGTAGATC | 30     | 12       |
| 16       | +      | 307      | AGTGATGCCGATCTTCTATGA          | 21     | 13       |
| 1        | +      | 307      | AGTGATGCCGATCTTCTATG           | 20     | 13       |
| 7        | +      | 310      | GATGCCGATCTTCTATGAAGTAGA       | 24     | 16       |
| 24       | +      | 311      | ATGCCGATCTTCTATGAAGTA          | 21     | 17       |
| 18       | +      | 312      | TGCCGATCTTCTATGAAGTAGA         | 22     | 18       |
| 4        | +      | 313      | GCCGATCTTCTATGAAGTAGA          | 21     | 19       |
| 7        | +      | 321      | TCTATGAAGTAGATCCATCCG          | 21     | 6        |
| 7        | +      | 323      | TATGAAGTAGATCCATCCGAT          | 21     | 8        |
| 14       | +      | 325      | TGAAGTAGATCCATCCGATGTA         | 22     | 10       |
| 23       | +      | 325      | TGAAGTAGATCCATCCGATGT          | 21     | 10       |
| 1073     | +      | 326      | GAAGTAGATCCATCCGATGTA          | 21     | 11       |
| 2        | +      | 326      | GAAGTAGATCCATCCGATGT           | 20     | 11       |
| 14       | +      | 327      | AAGTAGATCCATCCGATGTACGGA       | 24     | 12       |
| 200      | +      | 327      | AAGTAGATCCATCCGATGTA           | 20     | 12       |
| 35       | +      | 327      | AAGTAGATCCATCCGATGTACG         | 22     | 12       |



|     |   |     |                                |    |    |
|-----|---|-----|--------------------------------|----|----|
| 56  | + | 327 | AAGTAGATCCATCCGATGTAC          | 21 | 12 |
| 13  | + | 328 | AGTAGATCCATCCGATGTACG          | 21 | 13 |
| 9   | + | 330 | TAGATCCATCCGATGTA              | 17 | 15 |
| 8   | + | 337 | ATCCGATGTACGGAAACAGACC         | 22 | 1  |
| 56  | + | 342 | ATGTACGGAAACAGACCGGAGA         | 22 | 6  |
| 4   | + | 343 | TGTACGGAAACAGACCGGAGATT        | 23 | 7  |
| 75  | + | 343 | TGTACGGAAACAGACCGGAGA          | 21 | 7  |
| 4   | + | 345 | TACGGAAACAGACCGGAGATTTTGGGA    | 27 | 9  |
| 1   | + | 347 | CGGAAACAGACCGGAGATTTTGGG       | 24 | 11 |
| 161 | + | 348 | GGAAACAGACCGGAGATTTTGG         | 22 | 12 |
| 17  | + | 348 | GGAAACAGACCGGAGATTTTGGG        | 23 | 12 |
| 1   | + | 348 | GGAAACAGACCGGAGATTTT           | 20 | 12 |
| 6   | + | 348 | GGAAACAGACCGGAGATTTTGGGA       | 24 | 12 |
| 78  | + | 348 | GGAAACAGACCGGAGATTTTGG         | 21 | 12 |
| 1   | + | 349 | GGAAACAGACCGGAGATTTTGGGAAGGCCT | 30 | 13 |
| 10  | + | 352 | ACAGACCGGAGATTTTGGGAAGGC       | 24 | 16 |
| 3   | + | 368 | GGGAAGGCCTTCAAAAATAGT          | 21 | 11 |
| 4   | + | 370 | GAAGGCCTTCAAAAATAGTTG          | 21 | 13 |
| 2   | + | 371 | AAGGCCTTCAAAAATAGTT            | 19 | 14 |
| 32  | + | 378 | TCAAAAATAGTTGTAAAAGTA          | 21 | 0  |
| 1   | + | 379 | CAAAAATAGTTGTAAAAGTA           | 20 | 1  |
| 13  | + | 380 | AAAAATAGTTGTAAAAGTAAA          | 21 | 2  |
| 4   | + | 381 | AAAATAGTTGTAAAAGTAAAA          | 21 | 3  |
| 82  | + | 388 | TTGTAAAAGTAAAATAAGGA           | 21 | 10 |
| 27  | + | 389 | TGTAAAAGTAAAATAAGGA            | 20 | 11 |
| 299 | + | 389 | TGTAAAAGTAAAATAAGGAGG          | 22 | 11 |
| 30  | + | 389 | TGTAAAAGTAAAATAAGGAGGAGA       | 25 | 11 |
| 98  | + | 389 | TGTAAAAGTAAAATAAGGAG           | 21 | 11 |
| 133 | + | 390 | GTAAAAGTAAAATAAGGAGG           | 21 | 12 |
| 1   | + | 390 | GTAAAAGTAAAATAAGGAGGA          | 22 | 12 |
| 1   | + | 391 | TAAAAGTAAAATAAGGAGG            | 20 | 13 |
| 825 | + | 391 | TAAAAGTAAAATAAGGAGGA           | 21 | 13 |
| 187 | + | 392 | AAAAGTAAAATAAGGAGGAG           | 21 | 14 |
| 57  | + | 392 | AAAAGTAAAATAAGGAGGAGA          | 22 | 14 |
| 26  | + | 393 | AAAGTAAAATAAGGAGGAGA           | 21 | 15 |
| 1   | + | 396 | GTAAAATAAGGAGGAG               | 17 | 18 |
| 6   | + | 396 | GTAAAATAAGGAGGAGAGGCAGA        | 24 | 18 |
| 33  | + | 398 | AAAATAAGGAGGAGAGGCAGA          | 22 | 20 |
| 508 | + | 399 | AAATAAGGAGGAGAGGCAGA           | 21 | 0  |
| 19  | + | 400 | AAATAAGGAGGAGAGGCAGAG          | 21 | 1  |
| 2   | + | 400 | AAATAAGGAGGAGAGGCAGA           | 20 | 1  |
| 6   | + | 400 | AAATAAGGAGGAGAGGCAGAGA         | 22 | 1  |
| 110 | + | 401 | ATAAGGAGGAGAGGCAGAGA           | 21 | 2  |
| 2   | + | 402 | CTAAGGAGGAGAGGCAGAGATG         | 22 | 3  |

|     |   |     |                          |    |    |
|-----|---|-----|--------------------------|----|----|
| 8   | + | 402 | CTAAGGAGGAGAGGCAGAGAT    | 21 | 3  |
| 14  | + | 403 | TAAGGAGGAGAGGCAGAGATG    | 21 | 4  |
| 16  | + | 403 | TAAGGAGGAGAGGCAGAGATGG   | 22 | 4  |
| 5   | + | 405 | AGGAGGAGAGGCAGAGATGGA    | 21 | 6  |
| 18  | + | 409 | GGAGAGGCAGAGATGGATCC     | 20 | 10 |
| 15  | + | 410 | GAGAGGCAGAGATGGATCCAA    | 21 | 11 |
| 111 | + | 411 | AGAGGCAGAGATGGATCCAAGC   | 22 | 12 |
| 73  | + | 411 | AGAGGCAGAGATGGATCCAAG    | 21 | 12 |
| 11  | + | 412 | GAGGCAGAGATGGATCCAAGC    | 21 | 13 |
| 43  | + | 413 | AGGCAGAGATGGATCCAAGCT    | 21 | 14 |
| 20  | + | 414 | GGCAGAGATGGATCCAAGCTT    | 21 | 15 |
| 3   | + | 415 | GCAGAGATGGATCCAAG        | 17 | 16 |
| 23  | + | 419 | AGATGGATCCAAGCTTTAATT    | 21 | 20 |
| 3   | + | 420 | GATGGATCCAAGCTTTAATTT    | 21 | 0  |
| 13  | + | 422 | TGGATCCAAGCTTTAATTTTT    | 21 | 2  |
| 109 | + | 428 | CAAGCTTTAATTTTTGTTGGC    | 21 | 8  |
| 14  | + | 429 | AAGCTTTAATTTTTGTTGGCA    | 21 | 9  |
| 1   | + | 430 | AGCTTTAATTTTTGTTGGC      | 19 | 10 |
| 70  | + | 432 | CTTTAATTTTTGTTGGCAACA    | 21 | 12 |
| 252 | + | 433 | TTTAATTTTTGTTGGCAACAT    | 21 | 13 |
| 59  | + | 433 | TTTAATTTTTGTTGGCAACA     | 20 | 13 |
| 6   | + | 433 | TTTAATTTTTGTTGGCAAC      | 19 | 13 |
| 80  | + | 433 | TTTAATTTTTGTTGGCAACATAGC | 24 | 13 |
| 3   | + | 434 | TTAATTTTTGTTGGCAACATAGC  | 23 | 14 |
| 6   | + | 434 | TTAATTTTTGTTGGCAACATAGCT | 24 | 14 |
| 70  | + | 434 | TTAATTTTTGTTGGCAACATA    | 21 | 14 |
| 2   | + | 435 | TAATTTTTGTTGGCAACATAG    | 21 | 15 |
| 147 | + | 436 | AATTTTTGTTGGCAACATAGC    | 21 | 16 |
| 37  | + | 439 | TTTTGTTGGCAACATAGCTGGA   | 22 | 19 |
| 4   | + | 439 | TTTTGTTGGCAACATAGCTGGAG  | 23 | 19 |
| 284 | + | 440 | TTTGTGGCAACATAGCTGGA     | 21 | 20 |
| 37  | + | 440 | TTTGTGGCAACATAGCTGGAG    | 22 | 20 |
| 2   | + | 441 | TTGTTGGCAACATAGCTGGAGAA  | 23 | 0  |
| 366 | + | 441 | TTGTTGGCAACATAGCTGGAG    | 21 | 0  |
| 683 | + | 441 | TTGTTGGCAACATAGCTGGAGA   | 22 | 0  |
| 1   | + | 442 | TGTTGGCAACATAGCTGGAGA    | 21 | 1  |
| 20  | + | 443 | GTTGGCAACATAGCTGGAGA     | 20 | 2  |
| 24  | + | 443 | GTTGGCAACATAGCTGGAGAA    | 21 | 2  |
| 13  | + | 444 | TTGGCAACATAGCTGGAGAACA   | 22 | 3  |
| 9   | + | 444 | TTGGCAACATAGCTGGAGAAC    | 21 | 3  |
| 29  | + | 447 | GCAACATAGCTGGAGAACT      | 21 | 6  |
| 13  | + | 449 | AACATAGCTGGAGAACTCG      | 21 | 8  |
| 5   | + | 449 | AACATAGCTGGAGAACTCGC     | 22 | 8  |
| 11  | + | 450 | ACATAGCTGGAGAACTCGCT     | 22 | 9  |

|      |   |     |                              |    |    |
|------|---|-----|------------------------------|----|----|
| 18   | + | 450 | ACATAGCTGGAGAACACTCGC        | 21 | 9  |
| 3    | + | 450 | ACATAGCTGGAGAACACTCGCTGAAATG | 28 | 9  |
| 97   | + | 451 | CATAGCTGGAGAACACTCGCT        | 21 | 10 |
| 191  | + | 452 | ATAGCTGGAGAACACTCGCTGA       | 22 | 11 |
| 63   | + | 452 | ATAGCTGGAGAACACTCGCTG        | 21 | 11 |
| 2287 | + | 453 | TAGCTGGAGAACACTCGCTGA        | 21 | 12 |
| 2    | + | 453 | TAGCTGGAGAACACTCGCTGAA       | 22 | 12 |
| 38   | + | 453 | TAGCTGGAGAACACTCG            | 17 | 12 |
| 1    | + | 454 | AGCTGGAGAACACTCGCTGA         | 20 | 13 |
| 288  | + | 454 | AGCTGGAGAACACTCGCTGAA        | 21 | 13 |
| 30   | + | 454 | AGCTGGAGAACACTCGCTGAAA       | 22 | 13 |
| 13   | + | 456 | CTGGAGAACACTCGCTGAAATG       | 22 | 15 |
| 53   | + | 457 | TGGAGAACACTCGCTGAAATGG       | 22 | 16 |
| 10   | + | 477 | GGAAAATGAAGCGGATA            | 18 | 15 |
| 19   | + | 478 | GGAAAATGAAGCGGATA            | 17 | 16 |
| 71   | + | 478 | GGAAAATGAAGCGGATATGAT        | 21 | 16 |
| 22   | + | 479 | GAAAATGAAGCGGATATGATT        | 21 | 17 |
| 6    | + | 479 | GAAAATGAAGCGGATATGATTGA      | 23 | 17 |
| 21   | + | 480 | AAAATGAAGCGGATATGATTG        | 21 | 18 |
| 6    | + | 480 | AAAATGAAGCGGATATGATTGA       | 22 | 18 |
| 47   | + | 481 | AAATGAAGCGGATATGATTGA        | 21 | 19 |
| 13   | + | 482 | AATGAAGCGGATATGATTGAA        | 21 | 20 |
| 3    | + | 483 | ATGAAGCGGATATGATTGAA         | 20 | 0  |
| 3    | + | 483 | ATGAAGCGGATATGATTGA          | 19 | 0  |
| 401  | + | 483 | ATGAAGCGGATATGATTGAAA        | 21 | 0  |
| 6    | + | 483 | ATGAAGCGGATATGATTGAAAA       | 22 | 0  |
| 6    | + | 484 | TGAAGCGGATATGATTGAAAAGAT     | 24 | 1  |
| 6    | + | 484 | TGAAGCGGATATGATTGAAAA        | 21 | 1  |
| 8    | + | 484 | TGAAGCGGATATGATTGAAAAG       | 22 | 1  |
| 16   | + | 485 | GAAGCGGATATGATTGAAAAGA       | 22 | 2  |
| 515  | + | 486 | AAGCGGATATGATTGAAAAGA        | 21 | 3  |
| 9    | + | 486 | AAGCGGATATGATTGAAAAGAT       | 22 | 3  |
| 342  | + | 487 | AGCGGATATGATTGAAAAGAT        | 21 | 4  |
| 5    | + | 489 | CGGATATGATTGAAAAGATAGC       | 22 | 6  |
| 25   | + | 494 | ATGATTGAAAAGATAGCCAAA        | 21 | 11 |
| 37   | + | 495 | TGATTGAAAAGATAGCCAAAGA       | 22 | 12 |
| 9    | + | 495 | TGATTGAAAAGATAGCCAAAG        | 21 | 12 |
| 275  | + | 497 | ATTGAAAAGATAGCCAAAGAT        | 21 | 14 |
| 68   | + | 497 | ATTGAAAAGATAGCCAAAGATG       | 22 | 14 |
| 1    | + | 498 | TTGAAAAGATAGCCAAAGATG        | 21 | 15 |
| 71   | + | 499 | TGAAAAGATAGCCAAAGATGT        | 21 | 16 |
| 6    | + | 500 | GAAAAGATAGCCAAAGATG          | 19 | 17 |
| 7    | + | 500 | GAAAAGATAGCCAAAGATGTT        | 21 | 17 |
| 4    | + | 501 | AAAAGATAGCCAAAGATGTTT        | 21 | 18 |

|      |   |     |                           |    |    |
|------|---|-----|---------------------------|----|----|
| 169  | + | 504 | AGATAGCCAAAGATGTTTCAGA    | 22 | 0  |
| 37   | + | 504 | AGATAGCCAAAGATGTTTCAG     | 21 | 0  |
| 249  | + | 505 | GATAGCCAAAGATGTTTCAGA     | 21 | 1  |
| 12   | + | 506 | ATAGCCAAAGATGTTTCAGATA    | 22 | 2  |
| 29   | + | 506 | ATAGCCAAAGATGTTTCAGAT     | 21 | 2  |
| 136  | + | 507 | TAGCCAAAGATGTTTCAGATA     | 21 | 3  |
| 3    | + | 507 | TAGCCAAAGATGTTTCAGATAA    | 22 | 3  |
| 5    | + | 512 | AAAGATGTTTCAGATAAACTGA    | 22 | 8  |
| 11   | + | 513 | AAGATGTTTCAGATAAACTGA     | 21 | 9  |
| 68   | + | 531 | TGAATGCTACACCTTCTAAAGA    | 22 | 6  |
| 6    | + | 533 | AATGCTACACCTTCTAAAGAT     | 21 | 8  |
| 3    | + | 537 | CTACACCTTCTAAAGATTTTG     | 21 | 12 |
| 8    | + | 537 | CTACACCTTCTAAAGATTTTGA    | 22 | 12 |
| 78   | + | 538 | TACACCTTCTAAAGATTTTGA     | 21 | 13 |
| 5    | + | 539 | ACACCTTCTAAAGATTTTGATG    | 22 | 14 |
| 73   | + | 539 | ACACCTTCTAAAGATTTTGAT     | 21 | 14 |
| 9    | + | 542 | CCTTCTAAAGATTTTGATGCA     | 21 | 17 |
| 12   | + | 544 | TTCTAAAGATTTTGATGCATT     | 21 | 19 |
| 3    | + | 547 | TAAAGATTTTGATGCATTTGTGG   | 23 | 1  |
| 41   | + | 547 | TAAAGATTTTGATGCATTTGT     | 21 | 1  |
| 65   | + | 548 | AAAGATTTTGATGCATTTGTG     | 21 | 2  |
| 277  | + | 549 | AAGATTTTGATGCATTTGTGG     | 21 | 3  |
| 3    | + | 549 | AAGATTTTGATGCATTTGTGGG    | 22 | 3  |
| 1    | + | 550 | AGATTTTGATGCATTTGTGG      | 20 | 4  |
| 63   | + | 550 | AGATTTTGATGCATTTGTGGG     | 21 | 4  |
| 224  | + | 551 | GATTTTGATGCATTTGTGGGA     | 21 | 5  |
| 2    | + | 552 | ATTTTGATGCATTTGTGGGACT    | 22 | 6  |
| 5    | + | 552 | ATTTTGATGCATTTGTGGGAC     | 21 | 6  |
| 4    | + | 553 | TTTTGATGCATTTGTGGGACTT    | 22 | 7  |
| 9    | + | 553 | TTTTGATGCATTTGTGGGACT     | 21 | 7  |
| 202  | + | 554 | TTTGATGCATTTGTGGGACTT     | 21 | 8  |
| 16   | + | 555 | TTGATGCATTTGTGGGACTTGA    | 22 | 9  |
| 4    | + | 555 | TTGATGCATTTGTGGGACTTGAGT  | 24 | 9  |
| 72   | + | 555 | TTGATGCATTTGTGGGACTTG     | 21 | 9  |
| 15   | + | 556 | TGATGCATTTGTGGGACTTGAGT   | 23 | 10 |
| 64   | + | 556 | TGATGCATTTGTGGGACTTGA     | 21 | 10 |
| 109  | + | 557 | GATGCATTTGTGGGACTTGAG     | 21 | 11 |
| 7    | + | 557 | GATGCATTTGTGGGACTTGAGT    | 22 | 11 |
| 1058 | + | 558 | ATGCATTTGTGGGACTTGAGT     | 21 | 12 |
| 18   | + | 558 | ATGCATTTGTGGGACTTGAGTT    | 22 | 12 |
| 1    | + | 558 | ATGCATTTGTGGGACTTGAG      | 20 | 12 |
| 4    | + | 558 | ATGCATTTGTGGGACTTGAGTTTC  | 24 | 12 |
| 5    | + | 558 | ATGCATTTGTGGGACTTGAGTTTCA | 25 | 12 |
| 122  | + | 559 | TGCATTTGTGGGACTTGAGTTT    | 22 | 13 |

|      |   |     |                           |    |    |
|------|---|-----|---------------------------|----|----|
| 1546 | + | 559 | TGCATTTGTGGGACTTGAGTT     | 21 | 13 |
| 17   | + | 559 | TGCATTTGTGGGACTTGAGTTTCA  | 24 | 13 |
| 137  | + | 560 | GCATTTGTGGGACTTGAGTTT     | 21 | 14 |
| 2    | + | 560 | GCATTTGTGGGACTTGAGTTTC    | 22 | 14 |
| 108  | + | 561 | CATTTGTGGGACTTGAGTTTC     | 21 | 15 |
| 20   | + | 561 | CATTTGTGGGACTTGAGTTTCA    | 22 | 15 |
| 17   | + | 562 | ATTTGTGGGACTTGAGTTTC      | 20 | 16 |
| 3961 | + | 562 | ATTTGTGGGACTTGAGTTTCA     | 21 | 16 |
| 4    | + | 562 | ATTTGTGGGACTTGAGTTT       | 19 | 16 |
| 6    | + | 562 | ATTTGTGGGACTTGAGT         | 17 | 16 |
| 8    | + | 562 | ATTTGTGGGACTTGAGTTTCACAT  | 24 | 16 |
| 116  | + | 563 | TTTGTGGGACTTGAGTTTCACA    | 22 | 17 |
| 14   | + | 563 | TTTGTGGGACTTGAGTTTCA      | 20 | 17 |
| 1    | + | 566 | GTGGGACTTGAGTTTCACATTAGGG | 25 | 20 |
| 4    | + | 567 | TGGGACTTGAGTTTCACATTAGGG  | 24 | 0  |
| 2    | + | 568 | GGGACTTGAGTTTCACATTAGGGA  | 24 | 1  |
| 2    | + | 568 | GGGACTTGAGTTTCACATTAG     | 21 | 1  |
| 7    | + | 568 | GGGACTTGAGTTTCACATTAGG    | 22 | 1  |
| 18   | + | 569 | GGACTTGAGTTTCACATTAGGG    | 22 | 2  |
| 108  | + | 570 | GACTTGAGTTTCACATTAGGG     | 21 | 3  |
| 2    | + | 570 | GACTTGAGTTTCACATTAGG      | 20 | 3  |
| 17   | + | 571 | ACTTGAGTTTCACATTAGGGAA    | 22 | 4  |
| 59   | + | 571 | ACTTGAGTTTCACATTAGGGA     | 21 | 4  |
| 5    | + | 571 | ACTTGAGTTTCACATTAGGGAATT  | 24 | 4  |
| 105  | + | 572 | CTTGAGTTTCACATTAGGGAA     | 21 | 5  |
| 10   | + | 572 | CTTGAGTTTCACATTAGGGAAT    | 22 | 5  |
| 1    | + | 572 | CTTGAGTTTCACATTAGGGA      | 20 | 5  |
| 7    | + | 572 | CTTGAGTTTCACATTAGGGAATT   | 23 | 5  |
| 98   | + | 573 | TTGAGTTTCACATTAGGGAAT     | 21 | 6  |
| 7    | + | 578 | TTTCACATTAGGGAATTAAGT     | 21 | 11 |
| 16   | + | 579 | TTCACATTAGGGAATTAAGTT     | 21 | 12 |
| 19   | + | 580 | TCACATTAGGGAATTAAGTTC     | 21 | 13 |
| 1    | + | 580 | TCACATTAGGGAATTAAGTTCT    | 22 | 13 |
| 13   | + | 581 | CACATTAGGGAATTAAGTTCT     | 21 | 14 |
| 26   | + | 590 | GAATTAAGTTCTCTGCTATAC     | 21 | 2  |
| 140  | + | 591 | AATTAAGTTCTCTGCTATACC     | 21 | 3  |
| 59   | + | 592 | ATTAAGTTCTCTGCTATACCT     | 21 | 4  |
| 4    | + | 593 | TTAAGTTCTCTGCTATACCTA     | 21 | 5  |
| 5    | + | 596 | AGTTCTCTGCTATACCTAGAC     | 21 | 8  |
| 22   | + | 597 | GTTCTCTGCTATACCTAGACT     | 21 | 9  |
| 317  | + | 598 | TTCTCTGCTATACCTAGACTA     | 21 | 10 |
| 1    | + | 599 | TCTCTGCTATACCTAGACTATG    | 22 | 11 |
| 10   | + | 600 | CTCTGCTATACCTAGACTATGA    | 22 | 12 |
| 16   | + | 601 | TCTGCTATACCTAGACTATGAG    | 22 | 13 |

|      |   |     |                              |    |    |
|------|---|-----|------------------------------|----|----|
| 20   | + | 601 | TCTGCTATACCTAGACTATGA        | 21 | 13 |
| 1    | + | 602 | CTGCTATACCTAGACTATGAGCAA     | 24 | 14 |
| 1    | + | 602 | CTGCTATACCTAGACTATGA         | 20 | 14 |
| 417  | + | 602 | CTGCTATACCTAGACTATGAG        | 21 | 14 |
| 54   | + | 602 | CTGCTATACCTAGACTATGAGC       | 22 | 14 |
| 2    | + | 603 | TGCTATACCTAGACTATGAG         | 20 | 15 |
| 98   | + | 603 | TGCTATACCTAGACTATGAGC        | 21 | 15 |
| 106  | + | 606 | TATACCTAGACTATGAGCAAG        | 21 | 18 |
| 31   | + | 607 | ATACCTAGACTATGAGCAAGTG       | 22 | 19 |
| 1    | + | 608 | TACCTAGACTATGAGCAAGTGA       | 22 | 20 |
| 2    | + | 608 | TACCTAGACTATGAGCAAGTGAG      | 23 | 20 |
| 61   | + | 608 | TACCTAGACTATGAGCAAGTG        | 21 | 20 |
| 89   | + | 609 | ACCTAGACTATGAGCAAGTGA        | 21 | 0  |
| 128  | + | 610 | CCTAGACTATGAGCAAGTGAG        | 21 | 1  |
| 15   | + | 610 | CCTAGACTATGAGCAAGTGAGG       | 22 | 1  |
| 8    | + | 610 | CCTAGACTATGAGCAAGTGA         | 20 | 1  |
| 5    | + | 611 | CTAGACTATGAGCAAGTGAGG        | 21 | 2  |
| 1    | + | 612 | TAGACTATGAGCAAGTGAGG         | 20 | 3  |
| 673  | + | 612 | TAGACTATGAGCAAGTGAGGA        | 21 | 3  |
| 20   | + | 613 | AGACTATGAGCAAGTGAGGAT        | 21 | 4  |
| 4    | + | 616 | CTATGAGCAAGTGAGGATAGTAGGAATC | 28 | 7  |
| 1    | + | 617 | TATGAGCAAGTGAGGATAGTA        | 21 | 8  |
| 22   | + | 617 | TATGAGCAAGTGAGGATAGTAG       | 22 | 8  |
| 5    | + | 618 | ATGAGCAAGTGAGGATAGTAGG       | 22 | 9  |
| 73   | + | 618 | ATGAGCAAGTGAGGATAGTAG        | 21 | 9  |
| 156  | + | 619 | TGAGCAAGTGAGGATAGTAGG        | 21 | 10 |
| 3    | + | 620 | GAGCAAGTGAGGATAGTAGGA        | 21 | 11 |
| 191  | + | 621 | AGCAAGTGAGGATAGTAGGAA        | 21 | 12 |
| 13   | + | 622 | GCAAGTGAGGATAGTAGG           | 18 | 13 |
| 2    | + | 622 | GCAAGTGAGGATAGTAGGAA         | 20 | 13 |
| 3    | + | 622 | GCAAGTGAGGATAGTAGGAATCTG     | 24 | 13 |
| 461  | + | 622 | GCAAGTGAGGATAGTAGGAAT        | 21 | 13 |
| 47   | + | 622 | GCAAGTGAGGATAGTAGGAATC       | 22 | 13 |
| 22   | + | 623 | CAAGTGAGGATAGTAGGAATCT       | 22 | 14 |
| 36   | + | 623 | CAAGTGAGGATAGTAGGAATC        | 21 | 14 |
| 1    | + | 624 | AAGTGAGGATAGTAGGAAT          | 19 | 15 |
| 297  | + | 624 | AAGTGAGGATAGTAGGAATCT        | 21 | 15 |
| 34   | + | 624 | AAGTGAGGATAGTAGGAATCTG       | 22 | 15 |
| 1628 | + | 625 | AGTGAGGATAGTAGGAATCTG        | 21 | 16 |
| 80   | + | 625 | AGTGAGGATAGTAGGAATCTGT       | 22 | 16 |
| 51   | + | 626 | GTGAGGATAGTAGGAATCTGT        | 21 | 17 |
| 7    | + | 626 | GTGAGGATAGTAGGAATCTG         | 20 | 17 |
| 51   | + | 627 | TGAGGATAGTAGGAATCTGTGG       | 22 | 18 |
| 84   | + | 627 | TGAGGATAGTAGGAATCTGTG        | 21 | 18 |

|     |   |     |                               |    |    |
|-----|---|-----|-------------------------------|----|----|
| 24  | + | 628 | GAGGATAGTAGGAATCTGTGGC        | 22 | 19 |
| 7   | + | 628 | GAGGATAGTAGGAATCTGTGG         | 21 | 19 |
| 24  | + | 629 | AGGATAGTAGGAATCTGTGGC         | 21 | 20 |
| 43  | + | 629 | AGGATAGTAGGAATCTGTGGCC        | 22 | 20 |
| 29  | + | 630 | GGATAGTAGGAATCTGTGGCC         | 21 | 0  |
| 42  | + | 630 | GGATAGTAGGAATCTGTGGCCCTG      | 24 | 0  |
| 23  | + | 631 | GATAGTAGGAATCTGTGGC           | 19 | 1  |
| 255 | + | 631 | GATAGTAGGAATCTGTGGCCC         | 21 | 1  |
| 4   | + | 631 | GATAGTAGGAATCTGTGGCCCTGCA     | 25 | 1  |
| 120 | + | 632 | ATAGTAGGAATCTGTGGCCCTG        | 22 | 2  |
| 187 | + | 632 | ATAGTAGGAATCTGTGGCCCT         | 21 | 2  |
| 10  | + | 633 | TAGTAGGAATCTGTGGCC            | 18 | 3  |
| 1   | + | 633 | TAGTAGGAATCTGTGGCCCTGCAGGAATT | 29 | 3  |
| 258 | + | 633 | TAGTAGGAATCTGTGGCCCTGC        | 22 | 3  |
| 350 | + | 633 | TAGTAGGAATCTGTGGCCCTG         | 21 | 3  |
| 122 | + | 634 | AGTAGGAATCTGTGGCCCTGC         | 21 | 4  |
| 9   | + | 634 | AGTAGGAATCTGTGGCCCTGCA        | 22 | 4  |
| 61  | + | 636 | TAGGAATCTGTGGCCCTGCAG         | 21 | 6  |
| 7   | + | 637 | AGGAATCTGTGGCCCTGCAGGAATC     | 25 | 7  |
| 9   | + | 638 | GGAATCTGTGGCCCTGCAGGA         | 21 | 8  |
| 19  | + | 640 | AATCTGTGGCCCTGCAGGAAT         | 21 | 10 |
| 129 | + | 642 | TCTGTGGCCCTGCAGGAATCGG        | 22 | 12 |
| 29  | + | 642 | TCTGTGGCCCTGCAGGAATCG         | 21 | 12 |
| 10  | + | 643 | CTGTGGCCCTGCAGGAATCGGTA       | 23 | 13 |
| 256 | + | 643 | CTGTGGCCCTGCAGGAATCGGT        | 22 | 13 |
| 704 | + | 643 | CTGTGGCCCTGCAGGAATCGG         | 21 | 13 |
| 8   | + | 643 | CTGTGGCCCTGCAGGAATCG          | 20 | 13 |
| 873 | + | 644 | TGTGGCCCTGCAGGAATCGGT         | 21 | 14 |
| 8   | + | 644 | TGTGGCCCTGCAGGAATCGG          | 20 | 14 |
| 12  | + | 645 | GTGGCCCTGCAGGAATCGGT          | 20 | 15 |
| 1   | + | 645 | GTGGCCCTGCAGGAATCGG           | 19 | 15 |
| 67  | + | 645 | GTGGCCCTGCAGGAATCGGTA         | 21 | 15 |
| 290 | + | 646 | TGGCCCTGCAGGAATCGGTAA         | 21 | 16 |
| 308 | + | 646 | TGGCCCTGCAGGAATCGGTAAAG       | 22 | 16 |
| 12  | + | 647 | GGCCCTGCAGGAATCGGTAAAG        | 21 | 17 |
| 4   | + | 648 | GCCCTGCAGGAATCGGTAAAGA        | 21 | 18 |
| 16  | + | 649 | CCCTGCAGGAATCGGTAAAGAC        | 21 | 19 |
| 6   | + | 649 | CCCTGCAGGAATCGGTAAAGACT       | 22 | 19 |
| 12  | + | 650 | CCTGCAGGAATCGGTAAAGACTA       | 22 | 20 |
| 39  | + | 650 | CCTGCAGGAATCGGTAAAGACT        | 21 | 20 |
| 335 | + | 651 | CTGCAGGAATCGGTAAAGACTA        | 21 | 0  |
| 3   | + | 651 | CTGCAGGAATCGGTAAAGACTACC      | 23 | 0  |
| 240 | + | 652 | TGCAGGAATCGGTAAAGACTAC        | 21 | 1  |
| 371 | + | 652 | TGCAGGAATCGGTAAAGACTACC       | 22 | 1  |

|      |   |     |                          |    |    |
|------|---|-----|--------------------------|----|----|
| 1    | + | 653 | GCAGGAATCGGTAAGACTACCA   | 22 | 2  |
| 1    | + | 653 | GCAGGAATCGGTAAGACTAC     | 20 | 2  |
| 20   | + | 653 | GCAGGAATCGGTAAGACTACC    | 21 | 2  |
| 27   | + | 654 | CAGGAATCGGTAAGACTACCA    | 21 | 3  |
| 16   | + | 655 | AGGAATCGGTAAGACTACCAT    | 21 | 4  |
| 28   | + | 655 | AGGAATCGGTAAGACTACCATT   | 22 | 4  |
| 55   | + | 659 | ATCGGTAAGACTACCATTGCT    | 21 | 8  |
| 14   | + | 660 | TCGGTAAGACTACCATTGCTCG   | 22 | 9  |
| 35   | + | 660 | TCGGTAAGACTACCATTGCTC    | 21 | 9  |
| 11   | + | 661 | CGGTAAGACTACCATTGCTCGTGC | 24 | 10 |
| 4    | + | 661 | CGGTAAGACTACCATTGCTCG    | 21 | 10 |
| 44   | + | 663 | GTAAGACTACCATTGCTCGTG    | 21 | 12 |
| 8    | + | 663 | GTAAGACTACCATTGCTCGTGC   | 22 | 12 |
| 18   | + | 664 | TAAGACTACCATTGCTCGTG     | 20 | 13 |
| 1    | + | 664 | TAAGACTACCATTGCTC        | 17 | 13 |
| 22   | + | 664 | TAAGACTACCATTGCTCGTGCTTT | 24 | 13 |
| 2673 | + | 664 | TAAGACTACCATTGCTCGTGC    | 21 | 13 |
| 64   | + | 664 | TAAGACTACCATTGCTCGTGCT   | 22 | 13 |
| 10   | + | 665 | AAGACTACCATTGCTCGTGC     | 20 | 14 |
| 2    | + | 665 | AAGACTACCATTGCTCGTGCTTT  | 23 | 14 |
| 774  | + | 665 | AAGACTACCATTGCTCGTGCT    | 21 | 14 |
| 8    | + | 665 | AAGACTACCATTGCTCGTGCTT   | 22 | 14 |
| 135  | + | 666 | AGACTACCATTGCTCGTGCTT    | 21 | 15 |
| 1    | + | 666 | AGACTACCATTGCTCGTGCTTT   | 22 | 15 |
| 14   | + | 667 | GACTACCATTGCTCGTGCTTT    | 21 | 16 |
| 42   | + | 668 | ACTACCATTGCTCGTGCTTTAC   | 22 | 17 |
| 64   | + | 668 | ACTACCATTGCTCGTGCTTTA    | 21 | 17 |
| 33   | + | 669 | CTACCATTGCTCGTGCTTTAC    | 21 | 18 |
| 8    | + | 672 | CCATTGCTCGTGCTTTACAAA    | 21 | 0  |
| 23   | + | 673 | CATTGCTCGTGCTTTACAAAGC   | 22 | 1  |
| 247  | + | 674 | ATTGCTCGTGCTTTACAAAGC    | 21 | 2  |
| 16   | + | 675 | TTGCTCGTGCTTTACAAAGCC    | 21 | 3  |
| 8    | + | 675 | TTGCTCGTGCTTTACAAAGCCT   | 22 | 3  |
| 65   | + | 684 | CTTTACAAAGCCTACTCTCTA    | 21 | 12 |
| 124  | + | 685 | TTTACAAAGCCTACTCTCTAG    | 21 | 13 |
| 395  | + | 685 | TTTACAAAGCCTACTCTCTAGC   | 22 | 13 |
| 6    | + | 685 | TTTACAAAGCCTACTCTCTA     | 20 | 13 |
| 20   | + | 686 | TTACAAAGCCTACTCTCTAGCA   | 22 | 14 |
| 485  | + | 686 | TTACAAAGCCTACTCTCTAGC    | 21 | 14 |
| 16   | + | 687 | TACAAAGCCTACTCTCTAGCAATT | 24 | 15 |
| 6    | + | 687 | TACAAAGCCTACTCTCTAGC     | 20 | 15 |
| 70   | + | 687 | TACAAAGCCTACTCTCTAGCA    | 21 | 15 |
| 33   | + | 688 | ACAAAGCCTACTCTCTAGCAA    | 21 | 16 |
| 2    | + | 689 | CAAAGCCTACTCTCTAGCAAT    | 21 | 17 |



|     |   |     |                            |    |    |
|-----|---|-----|----------------------------|----|----|
| 44  | + | 690 | AAAGCCTACTCTCTAGCAATT      | 21 | 18 |
| 21  | + | 695 | CTACTCTCTAGCAATTTTCAGC     | 22 | 2  |
| 58  | + | 695 | CTACTCTCTAGCAATTTTCAG      | 21 | 2  |
| 7   | + | 695 | CTACTCTCTAGCAATTTTCA       | 20 | 2  |
| 11  | + | 696 | TACTCTCTAGCAATTTTCAGCG     | 22 | 3  |
| 21  | + | 696 | TACTCTCTAGCAATTTTCAGC      | 21 | 3  |
| 2   | + | 696 | TACTCTCTAGCAATTTTCAGCGA    | 23 | 3  |
| 14  | + | 697 | ACTCTCTAGCAATTTTCAGCG      | 21 | 4  |
| 25  | + | 698 | CTCTCTAGCAATTTTCAGCGA      | 21 | 5  |
| 2   | + | 701 | TCTAGCAATTTTCAGCGAAGT      | 21 | 8  |
| 15  | + | 702 | CTAGCAATTTTCAGCGAAGTTG     | 22 | 9  |
| 7   | + | 702 | CTAGCAATTTTCAGCGAAGTT      | 21 | 9  |
| 74  | + | 705 | GCAATTTTCAGCGAAGTTGTT      | 21 | 12 |
| 27  | + | 707 | AATTTTCAGCGAAGTTGTTTT      | 21 | 14 |
| 15  | + | 708 | ATTTTCAGCGAAGTTGTTTTA      | 21 | 15 |
| 29  | + | 708 | ATTTTCAGCGAAGTTGTTTTATGGAG | 26 | 15 |
| 20  | + | 709 | TTTTCAGCGAAGTTGTTTTATG     | 22 | 16 |
| 8   | + | 709 | TTTTCAGCGAAGTTGTTTTAT      | 21 | 16 |
| 15  | + | 710 | TTTCAGCGAAGTTGTTTTATGG     | 22 | 17 |
| 36  | + | 710 | TTTCAGCGAAGTTGTTTTATG      | 21 | 17 |
| 145 | + | 711 | TTCAGCGAAGTTGTTTTATGG      | 21 | 18 |
| 197 | + | 712 | TCAGCGAAGTTGTTTTATGGA      | 21 | 19 |
| 44  | + | 712 | TCAGCGAAGTTGTTTTATGGAG     | 22 | 19 |
| 93  | + | 713 | CAGCGAAGTTGTTTTATGGAG      | 21 | 20 |
| 257 | + | 714 | AGCGAAGTTGTTTTATGGAGA      | 21 | 0  |
| 29  | + | 714 | AGCGAAGTTGTTTTATGGAGAA     | 22 | 0  |
| 197 | + | 715 | GCGAAGTTGTTTTATGGAGAA      | 21 | 1  |
| 212 | + | 716 | CGAAGTTGTTTTATGGAGAATG     | 22 | 2  |
| 2   | + | 718 | AAGTTGTTTTATGGAGAATGTT     | 22 | 4  |
| 5   | + | 718 | AAGTTGTTTTATGGAGAATGTTAGG  | 25 | 4  |
| 169 | + | 719 | AGTTGTTTTATGGAGAATGTT      | 21 | 5  |
| 1   | + | 719 | AGTTGTTTTATGGAGAATGTTA     | 22 | 5  |
| 57  | + | 721 | TTGTTTTATGGAGAATGTTAGG     | 22 | 7  |
| 27  | + | 722 | TGTTTTATGGAGAATGTTAGG      | 21 | 8  |
| 7   | + | 722 | TGTTTTATGGAGAATGTTAGGG     | 22 | 8  |
| 11  | + | 723 | GTTTTATGGAGAATGTTAGGG      | 21 | 9  |
| 1   | + | 723 | GTTTTATGGAGAATGTTAGG       | 20 | 9  |
| 55  | + | 723 | GTTTTATGGAGAATGTTAGGGG     | 22 | 9  |
| 102 | + | 724 | TTTTATGGAGAATGTTAGGGG      | 21 | 10 |
| 63  | + | 724 | TTTTATGGAGAATGTTAGGGGA     | 22 | 10 |
| 20  | + | 725 | TTTATGGAGAATGTTAGGGGA      | 21 | 11 |
| 4   | + | 726 | TTATGGAGAATGTTAGGGGA       | 20 | 12 |
| 84  | + | 726 | TTATGGAGAATGTTAGGGGAA      | 21 | 12 |
| 63  | + | 727 | TATGGAGAATGTTAGGGGAAG      | 21 | 13 |

|      |   |     |                           |    |    |
|------|---|-----|---------------------------|----|----|
| 540  | + | 728 | ATGGAGAATGTTAGGGGAAGT     | 21 | 14 |
| 230  | + | 729 | TGGAGAATGTTAGGGGAAGTC     | 21 | 15 |
| 9    | + | 730 | GGAGAATGTTAGGGGAAGT       | 19 | 16 |
| 34   | + | 731 | GAGAATGTTAGGGGAAGTCTT     | 21 | 17 |
| 4    | + | 731 | GAGAATGTTAGGGGAAGTC       | 19 | 17 |
| 2    | + | 732 | AGAATGTTAGGGGAAGTCTTA     | 21 | 18 |
| 152  | + | 735 | ATGTTAGGGGAAGTCTTAATA     | 21 | 0  |
| 3    | + | 738 | TTAGGGGAAGTCTTAATATTG     | 21 | 3  |
| 4    | + | 738 | TTAGGGGAAGTCTTAATATTGGC   | 24 | 3  |
| 53   | + | 738 | TTAGGGGAAGTCTTAATATTGG    | 22 | 3  |
| 7    | + | 738 | TTAGGGGAAGTCTTAATATTGGG   | 23 | 3  |
| 114  | + | 739 | TAGGGGAAGTCTTAATATTGG     | 21 | 4  |
| 131  | + | 739 | TAGGGGAAGTCTTAATATTGGG    | 22 | 4  |
| 1012 | + | 740 | AGGGGAAGTCTTAATATTGGG     | 21 | 5  |
| 1    | + | 740 | AGGGGAAGTCTTAATATTGGGC    | 22 | 5  |
| 81   | + | 741 | GGGGAAGTCTTAATATTGGGC     | 21 | 6  |
| 48   | + | 745 | AAGTCTTAATATTGGGCTTGA     | 21 | 10 |
| 1    | + | 747 | GTCTTAATATTGGGCTTGACG     | 21 | 12 |
| 416  | + | 748 | TCTTAATATTGGGCTTGACGA     | 21 | 13 |
| 43   | + | 748 | TCTTAATATTGGGCTTGACGAG    | 22 | 13 |
| 73   | + | 749 | CTTAATATTGGGCTTGACGA      | 20 | 14 |
| 800  | + | 749 | CTTAATATTGGGCTTGACGAG     | 21 | 14 |
| 97   | + | 749 | CTTAATATTGGGCTTGACGAGT    | 22 | 14 |
| 192  | + | 750 | TTAATATTGGGCTTGACGAGTA    | 22 | 15 |
| 1    | + | 750 | TTAATATTGGGCTTGACGAGTAT   | 23 | 15 |
| 4    | + | 750 | TTAATATTGGGCTTGACGAG      | 20 | 15 |
| 566  | + | 750 | TTAATATTGGGCTTGACGAGT     | 21 | 15 |
| 1    | + | 751 | TAATATTGGGCTTGACGAG       | 19 | 16 |
| 1    | + | 751 | TAATATTGGGCTTGACGAGT      | 20 | 16 |
| 309  | + | 751 | TAATATTGGGCTTGACGAGTA     | 21 | 16 |
| 4    | + | 751 | TAATATTGGGCTTGACGAGTAT    | 22 | 16 |
| 10   | + | 752 | AATATTGGGCTTGACGAGTATG    | 22 | 17 |
| 12   | + | 752 | AATATTGGGCTTGACGAGTAT     | 21 | 17 |
| 6    | + | 752 | AATATTGGGCTTGACGAGTATGGT  | 24 | 17 |
| 10   | + | 753 | ATATTGGGCTTGACGAGTA       | 19 | 18 |
| 136  | + | 753 | ATATTGGGCTTGACGAGTATG     | 21 | 18 |
| 5    | + | 753 | ATATTGGGCTTGACGAGTATGGT   | 23 | 18 |
| 8    | + | 753 | ATATTGGGCTTGACGAGTATGG    | 22 | 18 |
| 32   | + | 754 | TATTGGGCTTGACGAGTATGG     | 21 | 19 |
| 50   | + | 754 | TATTGGGCTTGACGAGTATGGT    | 22 | 19 |
| 1    | + | 755 | ATTGGGCTTGACGAGTATGGTCTGA | 25 | 20 |
| 2    | + | 755 | ATTGGGCTTGACGAGTATGGTCT   | 23 | 20 |
| 605  | + | 755 | ATTGGGCTTGACGAGTATGGT     | 21 | 20 |
| 125  | + | 756 | TTGGGCTTGACGAGTATGGTCT    | 22 | 0  |

|     |   |     |                            |    |    |
|-----|---|-----|----------------------------|----|----|
| 627 | + | 756 | TTGGGCTTGACGAGTATGGTC      | 21 | 0  |
| 6   | + | 756 | TTGGGCTTGACGAGTATGGT       | 20 | 0  |
| 154 | + | 757 | TGGGCTTGACGAGTATGGTCT      | 21 | 1  |
| 15  | + | 757 | TGGGCTTGACGAGTATGGTCTG     | 22 | 1  |
| 1   | + | 757 | TGGGCTTGACGAGTATGGTC       | 20 | 1  |
| 10  | + | 758 | GGGCTTGACGAGTATGGTCTG      | 21 | 2  |
| 1   | + | 758 | GGGCTTGACGAGTATGGTC        | 19 | 2  |
| 5   | + | 759 | GGCTTGACGAGTATGGTCTGAAG    | 23 | 3  |
| 16  | + | 760 | GCTTGACGAGTATGGTCTGAAG     | 22 | 4  |
| 52  | + | 760 | GCTTGACGAGTATGGTCTGAA      | 21 | 4  |
| 28  | + | 761 | CTTGACGAGTATGGTCTGAAGT     | 22 | 5  |
| 50  | + | 762 | TTGACGAGTATGGTCTGAAGT      | 21 | 6  |
| 2   | + | 763 | TGACGAGTATGGTCTGAAGTTAGATT | 26 | 7  |
| 11  | + | 765 | ACGAGTATGGTCTGAAGTTAG      | 21 | 9  |
| 43  | + | 765 | ACGAGTATGGTCTGAAGTTAGA     | 22 | 9  |
| 4   | + | 765 | ACGAGTATGGTCTGAAGTTAGATT   | 24 | 9  |
| 22  | + | 766 | CGAGTATGGTCTGAAGTTAGAT     | 22 | 10 |
| 11  | + | 767 | GAGTATGGTCTGAAGTTAGAT      | 21 | 11 |
| 3   | + | 767 | GAGTATGGTCTGAAGTTAGATT     | 22 | 11 |
| 10  | + | 768 | AGTATGGTCTGAAGTTAGA        | 19 | 12 |
| 2   | + | 768 | AGTATGGTCTGAAGTTAGATTT     | 22 | 12 |
| 91  | + | 768 | AGTATGGTCTGAAGTTAGATT      | 21 | 12 |
| 2   | + | 769 | GTATGGTCTGAAGTTAGATTT      | 21 | 13 |
| 2   | + | 770 | TATGGTCTGAAGTTAGATTTAC     | 22 | 14 |
| 84  | + | 770 | TATGGTCTGAAGTTAGATTTA      | 21 | 14 |
| 27  | + | 771 | ATGGTCTGAAGTTAGATTTACA     | 22 | 15 |
| 5   | + | 771 | ATGGTCTGAAGTTAGATTTAC      | 21 | 15 |
| 11  | + | 772 | TGGTCTGAAGTTAGATTTACAA     | 22 | 16 |
| 2   | + | 772 | TGGTCTGAAGTTAGATTTACAAGA   | 24 | 16 |
| 3   | + | 772 | TGGTCTGAAGTTAGATTTACAAG    | 23 | 16 |
| 99  | + | 772 | TGGTCTGAAGTTAGATTTACA      | 21 | 16 |
| 12  | + | 773 | GGTCTGAAGTTAGATTTACAA      | 21 | 17 |
| 1   | + | 774 | GTCTGAAGTTAGATTTACAAGAACG  | 25 | 18 |
| 28  | + | 774 | GTCTGAAGTTAGATTTACAAGAAC   | 24 | 18 |
| 29  | + | 776 | CTGAAGTTAGATTTACAAGAA      | 21 | 20 |
| 4   | + | 776 | CTGAAGTTAGATTTACAAGA       | 20 | 20 |
| 199 | + | 777 | TGAAGTTAGATTTACAAGAACG     | 22 | 0  |
| 7   | + | 777 | TGAAGTTAGATTTACAAGAAC      | 21 | 0  |
| 7   | + | 779 | AAGTTAGATTTACAAGAACGA      | 21 | 2  |
| 18  | + | 780 | AGTTAGATTTACAAGAACGAC      | 21 | 3  |
| 7   | + | 780 | AGTTAGATTTACAAGAACGACT     | 22 | 3  |
| 57  | + | 782 | TTAGATTTACAAGAACGACTT      | 21 | 5  |
| 10  | + | 783 | TAGATTTACAAGAACGACTTCT     | 22 | 6  |
| 2   | + | 783 | TAGATTTACAAGAACGACTTC      | 21 | 6  |

|      |   |     |                          |    |    |
|------|---|-----|--------------------------|----|----|
| 18   | + | 787 | TTTACAAGAACGACTTCTTTC    | 21 | 10 |
| 1    | + | 788 | TTACAAGAACGACTTCTTTC     | 20 | 11 |
| 6    | + | 790 | ACAAGAACGACTTCTTTCAA     | 21 | 13 |
| 199  | + | 792 | AAGAACGACTTCTTTCAAAGA    | 21 | 15 |
| 1    | + | 793 | AGAACGACTTCTTTCAAAGA     | 20 | 16 |
| 2    | + | 793 | AGAACGACTTCTTTCAAAGATT   | 22 | 16 |
| 3    | + | 793 | AGAACGACTTCTTTCAAAGAT    | 21 | 16 |
| 1    | + | 801 | TTCTTTCAAAGATTATGAACC    | 21 | 3  |
| 3    | + | 801 | TTCTTTCAAAGATTATGAACCA   | 22 | 3  |
| 4    | + | 802 | TCTTTCAAAGATTATGAACCA    | 21 | 4  |
| 4    | + | 806 | TCAAAGATTATGAACCAAAG     | 21 | 8  |
| 12   | + | 807 | CAAAGATTATGAACCAAAA      | 19 | 9  |
| 6    | + | 807 | CAAAGATTATGAACCAAAGGG    | 22 | 9  |
| 71   | + | 808 | AAAGATTATGAACCAAAGGG     | 21 | 10 |
| 16   | + | 809 | AAGATTATGAACCAAAGGGT     | 21 | 11 |
| 1    | + | 809 | AAGATTATGAACCAAAGGGTAT   | 23 | 11 |
| 5    | + | 809 | AAGATTATGAACCAAAGGGTA    | 22 | 11 |
| 46   | + | 810 | AGATTATGAACCAAAGGGTA     | 21 | 12 |
| 1    | + | 811 | GATTATGAACCAAAGGGTA      | 20 | 13 |
| 23   | + | 812 | ATTATGAACCAAAGGGTATG     | 21 | 14 |
| 51   | + | 813 | TTATGAACCAAAGGGTATGA     | 21 | 15 |
| 36   | + | 814 | TATGAACCAAAGGGTATGAGG    | 22 | 16 |
| 59   | + | 814 | TATGAACCAAAGGGTATGAG     | 21 | 16 |
| 36   | + | 815 | ATGAACCAAAGGGTATGAGGA    | 22 | 17 |
| 66   | + | 815 | ATGAACCAAAGGGTATGAGG     | 21 | 17 |
| 127  | + | 816 | TGAACCAAAGGGTATGAGGA     | 21 | 18 |
| 60   | + | 816 | TGAACCAAAGGGTATGAGGAT    | 22 | 18 |
| 18   | + | 817 | GAACCAAAGGGTATGAGGAT     | 21 | 19 |
| 42   | + | 818 | AACCAAAGGGTATGAGGATA     | 21 | 20 |
| 1    | + | 819 | ACCAAAGGGTATGAGGATAG     | 21 | 0  |
| 61   | + | 821 | CAAAGGGTATGAGGATAGAGC    | 22 | 2  |
| 8    | + | 821 | CAAAGGGTATGAGGATAGAG     | 21 | 2  |
| 130  | + | 822 | AAAAGGGTATGAGGATAGAGCA   | 22 | 3  |
| 162  | + | 822 | AAAAGGGTATGAGGATAGAGC    | 21 | 3  |
| 7    | + | 822 | AAAAGGGTATGAGGATAGAG     | 20 | 3  |
| 1819 | + | 823 | AAAGGGTATGAGGATAGAGCA    | 21 | 4  |
| 1    | + | 823 | AAAGGGTATGAGGATAGAGC     | 20 | 4  |
| 23   | + | 823 | AAAGGGTATGAGGATAGAGCAT   | 22 | 4  |
| 10   | + | 824 | AAGGGTATGAGGATAGAGCATTAG | 25 | 5  |
| 1    | + | 824 | AAGGGTATGAGGATAGAGCA     | 20 | 5  |
| 6    | + | 824 | AAGGGTATGAGGATAGAGCATT   | 22 | 5  |
| 86   | + | 824 | AAGGGTATGAGGATAGAGCAT    | 21 | 5  |
| 11   | + | 825 | AGGGTATGAGGATAGAGCATT    | 21 | 6  |
| 2    | + | 825 | AGGGTATGAGGATAGAGCATTAG  | 24 | 6  |

|     |   |     |                               |    |    |
|-----|---|-----|-------------------------------|----|----|
| 6   | + | 828 | GTATGAGGATAGAGCATTTAG         | 21 | 9  |
| 39  | + | 829 | TATGAGGATAGAGCATTTAGGC        | 22 | 10 |
| 70  | + | 829 | TATGAGGATAGAGCATTTAGG         | 21 | 10 |
| 125 | + | 830 | ATGAGGATAGAGCATTTAGGC         | 21 | 11 |
| 1   | + | 831 | TGAGGATAGAGCATTTAGGC          | 20 | 12 |
| 443 | + | 831 | TGAGGATAGAGCATTTAGGCA         | 21 | 12 |
| 1   | + | 832 | GAGGATAGAGCATTTAGGCA          | 20 | 13 |
| 61  | + | 832 | GAGGATAGAGCATTTAGGCACA        | 22 | 13 |
| 7   | + | 832 | GAGGATAGAGCATTTAGGCAC         | 21 | 13 |
| 156 | + | 833 | AGGATAGAGCATTTAGGCACA         | 21 | 14 |
| 1   | + | 833 | AGGATAGAGCATTTAGGCACAA        | 22 | 14 |
| 1   | + | 834 | GGATAGAGCATTTAGGCACA          | 20 | 15 |
| 3   | + | 834 | GGATAGAGCATTTAGGCAC           | 19 | 15 |
| 8   | + | 834 | GGATAGAGCATTTAGGCACAA         | 21 | 15 |
| 12  | + | 836 | ATAGAGCATTTAGGCACAATA         | 21 | 17 |
| 7   | + | 837 | TAGAGCATTTAGGCACAATAAG        | 22 | 18 |
| 3   | + | 839 | GAGCATTTAGGCACAATAAGAG        | 22 | 20 |
| 1   | + | 841 | GCATTTAGGCACAATAAGAGA         | 21 | 1  |
| 2   | + | 841 | GCATTTAGGCACAATAAGAGATAGGTTAC | 30 | 1  |
| 34  | + | 842 | CATTTAGGCACAATAAGAGAT         | 21 | 2  |
| 42  | + | 843 | ATTTAGGCACAATAAGAGATA         | 21 | 3  |
| 4   | + | 843 | ATTTAGGCACAATAAGAGATAGGT      | 24 | 3  |
| 22  | + | 844 | TTTAGGCACAATAAGAGATAGG        | 22 | 4  |
| 4   | + | 844 | TTTAGGCACAATAAGAGATA          | 20 | 4  |
| 52  | + | 844 | TTTAGGCACAATAAGAGATAG         | 21 | 4  |
| 137 | + | 845 | TTAGGCACAATAAGAGATAGG         | 21 | 5  |
| 17  | + | 845 | TTAGGCACAATAAGAGATAGGT        | 22 | 5  |
| 258 | + | 846 | TAGGCACAATAAGAGATAGGT         | 21 | 6  |
| 6   | + | 846 | TAGGCACAATAAGAGATAGGTT        | 22 | 6  |
| 19  | + | 847 | AGGCACAATAAGAGATAGGTT         | 21 | 7  |
| 3   | + | 848 | GGCACAATAAGAGATAGG            | 18 | 8  |
| 1   | + | 849 | GCACAATAAGAGATAGGTTACA        | 22 | 9  |
| 7   | + | 849 | GCACAATAAGAGATAGGTTAC         | 21 | 9  |
| 19  | + | 852 | CAATAAGAGATAGGTTACATGA        | 22 | 12 |
| 13  | + | 853 | AATAAGAGATAGGTTACATGA         | 21 | 13 |
| 22  | + | 854 | ATAAGAGATAGGTTACATGACC        | 22 | 14 |
| 2   | + | 854 | ATAAGAGATAGGTTACATGACCA       | 23 | 14 |
| 302 | + | 854 | ATAAGAGATAGGTTACATGAC         | 21 | 14 |
| 16  | + | 856 | AAGAGATAGGTTACATGACCA         | 21 | 16 |
| 27  | + | 856 | AAGAGATAGGTTACATGA            | 18 | 16 |
| 2   | + | 859 | AGATAGGTTACATGACCAAAA         | 21 | 19 |
| 5   | + | 865 | GTTACATGACCAAAAAGTGCT         | 21 | 4  |
| 7   | + | 871 | TGACCAAAAAGTGCTTATCAT         | 21 | 10 |
| 15  | + | 875 | CAAAAAGTGCTTATCATTCTAG        | 22 | 14 |

|      |   |     |                          |    |    |
|------|---|-----|--------------------------|----|----|
| 2    | + | 875 | CAAAAAGTGCTTATCATTCTA    | 21 | 14 |
| 129  | + | 876 | AAAAAGTGCTTATCATTCTAG    | 21 | 15 |
| 435  | + | 876 | AAAAAGTGCTTATCATTCTAGA   | 22 | 15 |
| 1    | + | 877 | AAAAGTGCTTATCATTCTAGAT   | 22 | 16 |
| 4    | + | 877 | AAAAGTGCTTATCATTCTAGATGA | 24 | 16 |
| 612  | + | 877 | AAAAGTGCTTATCATTCTAGA    | 21 | 16 |
| 26   | + | 878 | AAAGTGCTTATCATTCTAGATGA  | 23 | 17 |
| 8    | + | 878 | AAAGTGCTTATCATTCTAGATG   | 22 | 17 |
| 34   | + | 879 | AAGTGCTTATCATTCTAGATG    | 21 | 18 |
| 47   | + | 879 | AAGTGCTTATCATTCTAGATGA   | 22 | 18 |
| 937  | + | 880 | AGTGCTTATCATTCTAGATGA    | 21 | 19 |
| 1    | + | 881 | GTGCTTATCATTCTAGATGA     | 20 | 20 |
| 5    | + | 883 | GCTTATCATTCTAGATGATGT    | 21 | 1  |
| 2    | + | 889 | CATTCTAGATGATGTTAATGAT   | 22 | 7  |
| 7    | + | 890 | ATTCTAGATGATGTTAATGAT    | 21 | 8  |
| 144  | + | 891 | TTCTAGATGATGTTAATGATC    | 21 | 9  |
| 5    | + | 891 | TTCTAGATGATGTTAATGATCT   | 22 | 9  |
| 4    | + | 892 | TCTAGATGATGTTAATGATCT    | 21 | 10 |
| 1    | + | 893 | CTAGATGATGTTAATGATCTC    | 21 | 11 |
| 3    | + | 894 | TAGATGATGTTAATGATCTCG    | 21 | 12 |
| 3    | + | 896 | GATGATGTTAATGATCTCGAT    | 21 | 14 |
| 28   | + | 897 | ATGATGTTAATGATCTCGATT    | 21 | 15 |
| 15   | + | 898 | TGATGTTAATGATCTCGATTT    | 21 | 16 |
| 41   | + | 900 | ATGTTAATGATCTCGATTTGTA   | 22 | 18 |
| 58   | + | 900 | ATGTTAATGATCTCGATTTGT    | 21 | 18 |
| 273  | + | 901 | TGTTAATGATCTCGATTTGTA    | 21 | 19 |
| 50   | + | 903 | TTAATGATCTCGATTTGTATGC   | 22 | 0  |
| 87   | + | 903 | TTAATGATCTCGATTTGTATG    | 21 | 0  |
| 30   | + | 904 | TAATGATCTCGATTTGTATGCT   | 22 | 1  |
| 36   | + | 904 | TAATGATCTCGATTTGTATGC    | 21 | 1  |
| 1068 | + | 905 | AATGATCTCGATTTGTATGCT    | 21 | 2  |
| 24   | + | 905 | AATGATCTCGATTTGTATGCTT   | 22 | 2  |
| 3    | + | 905 | AATGATCTCGATTTGTA        | 17 | 2  |
| 101  | + | 906 | ATGATCTCGATTTGTATGCTT    | 21 | 3  |
| 14   | + | 906 | ATGATCTCGATTTGTATGCTTT   | 22 | 3  |
| 2    | + | 906 | ATGATCTCGATTTGTATGCT     | 20 | 3  |
| 279  | + | 907 | TGATCTCGATTTGTATGCTTT    | 21 | 4  |
| 9    | + | 907 | TGATCTCGATTTGTATGCTTTG   | 22 | 4  |
| 244  | + | 909 | ATCTCGATTTGTATGCTTTGG    | 21 | 6  |
| 55   | + | 909 | ATCTCGATTTGTATGCTTTGGC   | 22 | 6  |
| 348  | + | 910 | TCTCGATTTGTATGCTTTGGC    | 21 | 7  |
| 63   | + | 911 | CTCGATTTGTATGCTTTGGCT    | 21 | 8  |
| 116  | + | 912 | TCGATTTGTATGCTTTGGCTG    | 21 | 9  |
| 8    | + | 912 | TCGATTTGTATGCTTTGGCTGA   | 22 | 9  |

|      |   |     |                          |    |    |
|------|---|-----|--------------------------|----|----|
| 107  | + | 913 | CGATTTGTATGCTTTGGCTGA    | 21 | 10 |
| 10   | + | 914 | GATTTGTATGCTTTGGCTGAT    | 21 | 11 |
| 41   | + | 915 | ATTTGTATGCTTTGGCTGATC    | 21 | 12 |
| 65   | + | 915 | ATTTGTATGCTTTGGCTGATCA   | 22 | 12 |
| 12   | + | 916 | TTTGTATGCTTTGGCTGATCA    | 21 | 13 |
| 3    | + | 916 | TTTGTATGCTTTGGCTGATCAG   | 22 | 13 |
| 16   | + | 917 | TTGTATGCTTTGGCTGATCAG    | 21 | 14 |
| 50   | + | 917 | TTGTATGCTTTGGCTGATCAGA   | 22 | 14 |
| 5    | + | 918 | TGTATGCTTTGGCTGATCAGAC   | 22 | 15 |
| 88   | + | 918 | TGTATGCTTTGGCTGATCAGA    | 21 | 15 |
| 20   | + | 919 | GTATGCTTTGGCTGATCAGA     | 20 | 16 |
| 86   | + | 919 | GTATGCTTTGGCTGATCAGAC    | 21 | 16 |
| 50   | + | 920 | TATGCTTTGGCTGATCAGACAACG | 24 | 17 |
| 6    | + | 920 | TATGCTTTGGCTGATCAGACAAC  | 23 | 17 |
| 92   | + | 920 | TATGCTTTGGCTGATCAGACA    | 21 | 17 |
| 185  | + | 921 | ATGCTTTGGCTGATCAGACA     | 20 | 18 |
| 48   | + | 921 | ATGCTTTGGCTGATCAGACAA    | 21 | 18 |
| 109  | + | 922 | TGCTTTGGCTGATCAGACAAC    | 21 | 19 |
| 1    | + | 922 | TGCTTTGGCTGATCAGACAACGTG | 24 | 19 |
| 10   | + | 923 | GCTTTGGCTGATCAGACAACGT   | 22 | 20 |
| 104  | + | 924 | CTTTGGCTGATCAGACAACGT    | 21 | 0  |
| 123  | + | 925 | TTTGGCTGATCAGACAACGTG    | 21 | 1  |
| 19   | + | 925 | TTTGGCTGATCAGACAACGTGG   | 22 | 1  |
| 8    | + | 925 | TTTGGCTGATCAGACAACGTGGT  | 23 | 1  |
| 273  | + | 926 | TTGGCTGATCAGACAACGTGGT   | 22 | 2  |
| 312  | + | 926 | TTGGCTGATCAGACAACGTGG    | 21 | 2  |
| 1217 | + | 927 | TGGCTGATCAGACAACGTGGT    | 21 | 3  |
| 160  | + | 927 | TGGCTGATCAGACAACGTGGTT   | 22 | 3  |
| 1    | + | 927 | TGGCTGATCAGACAACGTGG     | 20 | 3  |
| 14   | + | 928 | GGCTGATCAGACAACGTGGTTT   | 22 | 4  |
| 17   | + | 928 | GGCTGATCAGACAACGTGG      | 19 | 4  |
| 669  | + | 928 | GGCTGATCAGACAACGTGGTT    | 21 | 4  |
| 4    | + | 929 | GCTGATCAGACAACGTGGTT     | 20 | 5  |
| 23   | + | 930 | CTGATCAGACAACGTGGTTTGG   | 22 | 6  |
| 308  | + | 931 | TGATCAGACAACGTGGTTTGG    | 21 | 7  |
| 6    | + | 932 | GATCAGACAACGTGGTTTGGT    | 21 | 8  |
| 38   | + | 934 | TCAGACAACGTGGTTTGGTCC    | 21 | 10 |
| 3    | + | 934 | TCAGACAACGTGGTTTGGTCCTGG | 24 | 10 |
| 3    | + | 934 | TCAGACAACGTGGTTTGGTC     | 20 | 10 |
| 7    | + | 935 | CAGACAACGTGGTTTGGTCC     | 20 | 11 |
| 7    | + | 936 | AGACAACGTGGTTTGGTCCTGG   | 22 | 12 |
| 1    | + | 937 | GACAACGTGGTTTGGTCCTGGA   | 22 | 13 |
| 61   | + | 937 | GACAACGTGGTTTGGTCCTGG    | 21 | 13 |
| 417  | + | 938 | ACAACGTGGTTTGGTCCTGGA    | 21 | 14 |

|     |   |     |                               |    |    |
|-----|---|-----|-------------------------------|----|----|
| 24  | + | 939 | CAACGTGGTTTGGTCCTGGAAG        | 22 | 15 |
| 68  | + | 939 | CAACGTGGTTTGGTCCTGGAA         | 21 | 15 |
| 7   | + | 939 | CAACGTGGTTTGGTCCTGGA          | 20 | 15 |
| 42  | + | 940 | AACGTGGTTTGGTCCTGGAAG         | 21 | 16 |
| 51  | + | 940 | AACGTGGTTTGGTCCTGGAAGT        | 22 | 16 |
| 19  | + | 948 | TTGGTCCTGGAAGTAGGATTATCGTGACA | 29 | 3  |
| 39  | + | 952 | TCCTGGAAGTAGGATTATCGTG        | 22 | 7  |
| 1   | + | 953 | CCTGGAAGTAGGATTATCGTGA        | 22 | 8  |
| 36  | + | 953 | CCTGGAAGTAGGATTATCGTG         | 21 | 8  |
| 22  | + | 954 | CTGGAAGTAGGATTATCGTGAC        | 22 | 9  |
| 45  | + | 954 | CTGGAAGTAGGATTATCGTGA         | 21 | 9  |
| 44  | + | 955 | TGGAAGTAGGATTATCGTGACA        | 22 | 10 |
| 84  | + | 955 | TGGAAGTAGGATTATCGTGAC         | 21 | 10 |
| 119 | + | 957 | GAAGTAGGATTATCGTGACAA         | 21 | 12 |
| 54  | + | 957 | GAAGTAGGATTATCGTGACA          | 20 | 12 |
| 53  | + | 958 | AAGTAGGATTATCGTGACAACAGA      | 24 | 13 |
| 7   | + | 958 | AAGTAGGATTATCGTGACAAC         | 21 | 13 |
| 1   | + | 959 | AGTAGGATTATCGTGACAACAGA       | 23 | 14 |
| 27  | + | 959 | AGTAGGATTATCGTGACAACA         | 21 | 14 |
| 10  | + | 960 | GTAGGATTATCGTGACAACA          | 20 | 15 |
| 20  | + | 960 | GTAGGATTATCGTGACAACAG         | 21 | 15 |
| 2   | + | 961 | TAGGATTATCGTGACAACAGAAGACAA   | 27 | 16 |
| 312 | + | 961 | TAGGATTATCGTGACAACAGA         | 21 | 16 |
| 6   | + | 961 | TAGGATTATCGTGACAACAGAA        | 22 | 16 |
| 18  | + | 962 | AGGATTATCGTGACAACAGAAG        | 22 | 17 |
| 1   | + | 962 | AGGATTATCGTGACAACAGA          | 20 | 17 |
| 68  | + | 962 | AGGATTATCGTGACAACAGAA         | 21 | 17 |
| 26  | + | 963 | GGATTATCGTGACAACAGAAG         | 21 | 18 |
| 3   | + | 963 | GGATTATCGTGACAACAGA           | 19 | 18 |
| 33  | + | 965 | ATTATCGTGACAACAGAAGAC         | 21 | 20 |
| 44  | + | 965 | ATTATCGTGACAACAGAAGACA        | 22 | 20 |
| 4   | + | 965 | ATTATCGTGACAACAGAAGACAAC      | 24 | 20 |
| 34  | + | 966 | TTATCGTGACAACAGAAGACA         | 21 | 0  |
| 22  | + | 967 | TATCGTGACAACAGAAGACAA         | 21 | 1  |
| 15  | + | 968 | ATCGTGACAACAGAAGACAACG        | 22 | 2  |
| 824 | + | 968 | ATCGTGACAACAGAAGACAAC         | 21 | 2  |
| 14  | + | 969 | TCGTGACAACAGAAGACAACG         | 21 | 3  |
| 12  | + | 970 | CGTGACAACAGAAGACAACG          | 20 | 4  |
| 440 | + | 970 | CGTGACAACAGAAGACAACGA         | 21 | 4  |
| 10  | + | 971 | GTGACAACAGAAGACAACGA          | 20 | 5  |
| 4   | + | 971 | GTGACAACAGAAGACAACG           | 19 | 5  |
| 5   | + | 971 | GTGACAACAGAAGACAACGAGC        | 22 | 5  |
| 75  | + | 971 | GTGACAACAGAAGACAACGAG         | 21 | 5  |
| 353 | + | 972 | TGACAACAGAAGACAACGAGCT        | 22 | 6  |



|      |   |      |                           |    |    |
|------|---|------|---------------------------|----|----|
| 63   | + | 972  | TGACAACAGAAGACAACGAGC     | 21 | 6  |
| 3    | + | 973  | GACAACAGAAGACAACGAGCT     | 21 | 7  |
| 10   | + | 974  | ACAACAGAAGACAACGAGCTT     | 21 | 8  |
| 5    | + | 974  | ACAACAGAAGACAACGAGCT      | 20 | 8  |
| 7    | + | 976  | AACAGAAGACAACGAGCTTTT     | 21 | 10 |
| 4    | + | 980  | GAAGACAACGAGCTTTTGCAG     | 21 | 14 |
| 276  | + | 981  | AAGACAACGAGCTTTTGCAGA     | 21 | 15 |
| 54   | + | 982  | AGACAACGAGCTTTTGCAGAA     | 21 | 16 |
| 5    | + | 982  | AGACAACGAGCTTTTGCAGA      | 20 | 16 |
| 11   | + | 983  | GACAACGAGCTTTTGCAGAAA     | 21 | 17 |
| 11   | + | 988  | CGAGCTTTTGCAGAAACATGAT    | 22 | 1  |
| 11   | + | 989  | GAGCTTTTGCAGAAACATGAT     | 21 | 2  |
| 4    | + | 989  | GAGCTTTTGCAGAAACATGA      | 20 | 2  |
| 99   | + | 992  | CTTTTGCAGAAACATGATATT     | 21 | 5  |
| 19   | + | 993  | TTTTGCAGAAACATGATATTA     | 21 | 6  |
| 3    | + | 993  | TTTTGCAGAAACATGATATT      | 20 | 6  |
| 14   | + | 994  | TTTGCAGAAACATGATATTA      | 21 | 7  |
| 2    | + | 994  | TTTGCAGAAACATGATATTA      | 20 | 7  |
| 10   | + | 995  | TTGCAGAAACATGATATTAAC     | 21 | 8  |
| 39   | + | 995  | TTGCAGAAACATGATATTAACA    | 22 | 8  |
| 4    | + | 996  | TGCAGAAACATGATATTAACA     | 21 | 9  |
| 61   | + | 1008 | ATATTAACAATGTCTACCATG     | 21 | 0  |
| 3    | + | 1009 | TATTAACAATGTCTACCATGTGGA  | 24 | 1  |
| 10   | + | 1010 | ATTAACAATGTCTACCA         | 17 | 2  |
| 11   | + | 1010 | ATTAACAATGTCTACCATGTGG    | 22 | 2  |
| 12   | + | 1010 | ATTAACAATGTCTACCATGTGGATT | 25 | 2  |
| 24   | + | 1010 | ATTAACAATGTCTACCATGTG     | 21 | 2  |
| 109  | + | 1011 | TAAACAATGTCTACCATGTGG     | 21 | 3  |
| 329  | + | 1011 | TAAACAATGTCTACCATGTGGA    | 22 | 3  |
| 1050 | + | 1012 | TAACAATGTCTACCATGTGGA     | 21 | 4  |
| 13   | + | 1012 | TAACAATGTCTACCATGTGGAT    | 22 | 4  |
| 1    | + | 1012 | TAACAATGTCTACCATGTGG      | 20 | 4  |
| 4    | + | 1012 | TAACAATGTCTACCATGTGGATT   | 23 | 4  |
| 140  | + | 1013 | AACAATGTCTACCATGTGGATT    | 22 | 5  |
| 1    | + | 1013 | AACAATGTCTACCATGTGGA      | 20 | 5  |
| 75   | + | 1013 | AACAATGTCTACCATGTGGAT     | 21 | 5  |
| 265  | + | 1014 | ACAATGTCTACCATGTGGATT     | 21 | 6  |
| 6    | + | 1017 | ATGTCTACCATGTGGATT        | 18 | 9  |
| 3    | + | 1023 | ACCATGTGGATTTTCCATCTAG    | 22 | 15 |
| 16   | + | 1026 | ATGTGGATTTTCCATCTAGAA     | 21 | 18 |
| 5    | + | 1033 | TTTTCCATCTAGAAAAGA        | 18 | 4  |
| 3    | + | 1034 | TTTCCATCTAGAAAAGAAGCT     | 21 | 5  |
| 11   | + | 1035 | TTCCATCTAGAAAAGAAGCTC     | 21 | 6  |
| 60   | + | 1035 | TTCCATCTAGAAAAGAAGCTCT    | 22 | 6  |

|     |   |      |                          |    |    |
|-----|---|------|--------------------------|----|----|
| 11  | + | 1036 | TCCATCTAGAAAAGAAGCTCT    | 21 | 7  |
| 18  | + | 1037 | CCATCTAGAAAAGAAGCTCTT    | 21 | 8  |
| 7   | + | 1037 | CCATCTAGAAAAGAAGCTCTTG   | 22 | 8  |
| 4   | + | 1038 | CATCTAGAAAAGAAGCTCTTG    | 21 | 9  |
| 6   | + | 1038 | CATCTAGAAAAGAAGCTCTTGA   | 22 | 9  |
| 28  | + | 1039 | ATCTAGAAAAGAAGCTCTTGA    | 21 | 10 |
| 34  | + | 1039 | ATCTAGAAAAGAAGCTCT       | 18 | 10 |
| 1   | + | 1040 | TCTAGAAAAGAAGCTCTTGAG    | 21 | 11 |
| 92  | + | 1040 | TCTAGAAAAGAAGCTCTTGAGA   | 22 | 11 |
| 82  | + | 1041 | CTAGAAAAGAAGCTCTTGAGA    | 21 | 12 |
| 23  | + | 1042 | TAGAAAAGAAGCTCTTGAGAT    | 21 | 13 |
| 68  | + | 1042 | TAGAAAAGAAGCTCTTGAGATC   | 22 | 13 |
| 77  | + | 1042 | TAGAAAAGAAGCTCTTGAG      | 19 | 13 |
| 1   | + | 1043 | AGAAAAGAAGCTCTTGAG       | 18 | 14 |
| 6   | + | 1043 | AGAAAAGAAGCTCTTGAGATC    | 21 | 14 |
| 27  | + | 1045 | AAAAGAAGCTCTTGAGATCTT    | 21 | 16 |
| 49  | + | 1050 | AAGCTCTTGAGATCTTTTGCA    | 21 | 0  |
| 13  | + | 1051 | AGCTCTTGAGATCTTTTGCAG    | 21 | 1  |
| 27  | + | 1051 | AGCTCTTGAGATCTTTTGCAGA   | 22 | 1  |
| 1   | + | 1053 | CTCTTGAGATCTTTTGCAGAT    | 21 | 3  |
| 4   | + | 1054 | TCTTGAGATCTTTTGCAGATGTGC | 24 | 4  |
| 53  | + | 1054 | TCTTGAGATCTTTTGCAGATG    | 21 | 4  |
| 9   | + | 1054 | TCTTGAGATCTTTTGCAGATGT   | 22 | 4  |
| 44  | + | 1055 | CTTGAGATCTTTTGCAGATGTG   | 22 | 5  |
| 44  | + | 1056 | TTGAGATCTTTTGCAGATGTG    | 21 | 6  |
| 56  | + | 1056 | TTGAGATCTTTTGCAGATGTGC   | 22 | 6  |
| 62  | + | 1057 | TGAGATCTTTTGCAGATGTGC    | 21 | 7  |
| 21  | + | 1058 | GAGATCTTTTGCAGATGTGCT    | 21 | 8  |
| 15  | + | 1062 | TCTTTTGCAGATGTGCTTTTA    | 21 | 12 |
| 21  | + | 1064 | TTTTGCAGATGTGCTTTTAGAC   | 22 | 14 |
| 93  | + | 1064 | TTTTGCAGATGTGCTTTTAGA    | 21 | 14 |
| 39  | + | 1065 | TTTGCAGATGTGCTTTTAGACA   | 22 | 15 |
| 76  | + | 1065 | TTTGCAGATGTGCTTTTAGAC    | 21 | 15 |
| 273 | + | 1066 | TTGCAGATGTGCTTTTAGACA    | 21 | 16 |
| 11  | + | 1067 | TGCAGATGTGCTTTTAGACAA    | 21 | 17 |
| 4   | + | 1069 | CAGATGTGCTTTTAGACAAA     | 20 | 19 |
| 75  | + | 1069 | CAGATGTGCTTTTAGACAAAGC   | 22 | 19 |
| 13  | + | 1075 | TGCTTTTAGACAAAGCTCTGCA   | 22 | 4  |
| 13  | + | 1077 | CTTTTAGACAAAGCTCTGCAC    | 21 | 6  |
| 32  | + | 1077 | CTTTTAGACAAAGCTCTGCACC   | 22 | 6  |
| 109 | + | 1078 | TTTTAGACAAAGCTCTGCACC    | 21 | 7  |
| 7   | + | 1078 | TTTTAGACAAAGCTCTGCAC     | 20 | 7  |
| 20  | + | 1079 | TTTAGACAAAGCTCTGCACCTG   | 22 | 8  |
| 40  | + | 1079 | TTTAGACAAAGCTCTGCACCTGA  | 23 | 8  |

|     |   |      |                         |    |    |
|-----|---|------|-------------------------|----|----|
| 77  | + | 1079 | TTTAGACAAAGCTCTGCACCT   | 21 | 8  |
| 3   | + | 1080 | TTAGACAAAGCTCTGCACCTG   | 21 | 9  |
| 91  | + | 1080 | TTAGACAAAGCTCTGCACCTGA  | 22 | 9  |
| 101 | + | 1081 | TAGACAAAGCTCTGCACCTGA   | 21 | 10 |
| 1   | + | 1081 | TAGACAAAGCTCTGCACCTGAT  | 22 | 10 |
| 4   | + | 1082 | AGACAAAGCTCTGCACCTGAT   | 21 | 11 |
| 9   | + | 1083 | GACAAAGCTCTGCACCTGATAC  | 22 | 12 |
| 27  | + | 1084 | ACAAAGCTCTGCACCTGATAC   | 21 | 13 |
| 2   | + | 1086 | AAAGCTCTGCACCTGATACGAT  | 22 | 15 |
| 459 | + | 1086 | AAAGCTCTGCACCTGATACGA   | 21 | 15 |
| 135 | + | 1087 | AAGCTCTGCACCTGATACGAT   | 21 | 16 |
| 3   | + | 1087 | AAGCTCTGCACCTGATACGA    | 20 | 16 |
| 2   | + | 1088 | AGCTCTGCACCTGATACGATT   | 21 | 17 |
| 2   | + | 1089 | GCTCTGCACCTGATACGATTC   | 21 | 18 |
| 6   | + | 1090 | CTCTGCACCTGATACGATTCTA  | 22 | 19 |
| 161 | + | 1091 | TCTGCACCTGATACGATTCTAA  | 22 | 20 |
| 18  | + | 1091 | TCTGCACCTGATACGATTCTA   | 21 | 20 |
| 1   | + | 1092 | CTGCACCTGATACGATTCTA    | 20 | 0  |
| 22  | + | 1093 | TGCACCTGATACGATTCTAAAG  | 22 | 1  |
| 2   | + | 1095 | CACCTGATACGATTCTAAAGC   | 21 | 3  |
| 1   | + | 1096 | ACCTGATACGATTCTAAAG     | 19 | 4  |
| 99  | + | 1096 | ACCTGATACGATTCTAAAGCT   | 21 | 4  |
| 114 | + | 1097 | CCTGATACGATTCTAAAGCTTG  | 22 | 5  |
| 29  | + | 1097 | CCTGATACGATTCTAAAGCTT   | 21 | 5  |
| 7   | + | 1099 | TGATACGATTCTAAAGCTTGCA  | 22 | 7  |
| 84  | + | 1099 | TGATACGATTCTAAAGCTTGC   | 21 | 7  |
| 17  | + | 1100 | GATACGATTCTAAAGCTTGCA   | 21 | 8  |
| 26  | + | 1100 | GATACGATTCTAAAGCT       | 17 | 8  |
| 190 | + | 1101 | ATACGATTCTAAAGCTTGCAGA  | 22 | 9  |
| 3   | + | 1101 | ATACGATTCTAAAGCTTGCAGAA | 23 | 9  |
| 79  | + | 1101 | ATACGATTCTAAAGCTTGCAG   | 21 | 9  |
| 495 | + | 1102 | TACGATTCTAAAGCTTGCAGA   | 21 | 10 |
| 13  | + | 1103 | ACGATTCTAAAGCTTGCAG     | 19 | 11 |
| 19  | + | 1103 | ACGATTCTAAAGCTTGCAGAA   | 21 | 11 |
| 1   | + | 1103 | ACGATTCTAAAGCTTGCAGA    | 20 | 11 |
| 35  | + | 1104 | CGATTCTAAAGCTTGCAGAAC   | 21 | 12 |
| 258 | + | 1106 | ATTCTAAAGCTTGCAGAACGA   | 21 | 14 |
| 59  | + | 1106 | ATTCTAAAGCTTGCAGAACGAG  | 22 | 14 |
| 1   | + | 1107 | TTCTAAAGCTTGCAGAACGA    | 20 | 15 |
| 359 | + | 1107 | TTCTAAAGCTTGCAGAACGAG   | 21 | 15 |
| 6   | + | 1108 | TCTAAAGCTTGCAGAACGAGTA  | 22 | 16 |
| 9   | + | 1108 | TCTAAAGCTTGCAGAACGAGT   | 21 | 16 |
| 9   | + | 1109 | CTAAAGCTTGCAGAACGAGTA   | 21 | 17 |
| 8   | + | 1110 | TAAAGCTTGCAGAACGAGTAAC  | 22 | 18 |

|      |   |      |                                |    |    |
|------|---|------|--------------------------------|----|----|
| 10   | + | 1113 | AGCTTGCAGAACGAGTAACAGA         | 22 | 0  |
| 43   | + | 1113 | AGCTTGCAGAACGAGTAACAG          | 21 | 0  |
| 34   | + | 1115 | CTTGCAGAACGAGTAACAGAG          | 21 | 2  |
| 5    | + | 1115 | CTTGCAGAACGAGTAACAGAGCT        | 23 | 2  |
| 62   | + | 1115 | CTTGCAGAACGAGTAACAGAGC         | 22 | 2  |
| 1166 | + | 1116 | TTGCAGAACGAGTAACAGAGC          | 21 | 3  |
| 11   | + | 1116 | TTGCAGAACGAGTAACA              | 17 | 3  |
| 15   | + | 1116 | TTGCAGAACGAGTAACAGAGCT         | 22 | 3  |
| 3    | + | 1116 | TTGCAGAACGAGTAACAGA            | 19 | 3  |
| 7    | + | 1117 | TGCAGAACGAGTAACAGA             | 18 | 4  |
| 821  | + | 1117 | TGCAGAACGAGTAACAGAGCT          | 21 | 4  |
| 26   | + | 1118 | GCAGAACGAGTAACAGAGCTT          | 21 | 5  |
| 7    | + | 1118 | GCAGAACGAGTAACAGAGC            | 19 | 5  |
| 5    | + | 1119 | CAGAACGAGTAACAGAGCTTT          | 21 | 6  |
| 48   | + | 1122 | AACGAGTAACAGAGCTTTGTG          | 21 | 9  |
| 19   | + | 1123 | ACGAGTAACAGAGCTTTGTGGT         | 22 | 10 |
| 3    | + | 1123 | ACGAGTAACAGAGCTTTGTGGTAA       | 24 | 10 |
| 55   | + | 1123 | ACGAGTAACAGAGCTTTGTGG          | 21 | 10 |
| 14   | + | 1124 | CGAGTAACAGAGCTTTGTGGTA         | 22 | 11 |
| 38   | + | 1124 | CGAGTAACAGAGCTTTGTGGT          | 21 | 11 |
| 133  | + | 1125 | GAGTAACAGAGCTTTGTGGTA          | 21 | 12 |
| 30   | + | 1126 | AGTAACAGAGCTTTGTGGTAA          | 21 | 13 |
| 2    | + | 1127 | GTAACAGAGCTTTGTGGTAATC         | 22 | 14 |
| 24   | + | 1128 | TAACAGAGCTTTGTGGTAATCT         | 22 | 15 |
| 7    | + | 1128 | TAACAGAGCTTTGTGGTAATC          | 21 | 15 |
| 12   | + | 1130 | ACAGAGCTTTGTGGTAATCTCCA        | 24 | 17 |
| 1    | + | 1130 | ACAGAGCTTTGTGGTAATCTT          | 21 | 17 |
| 7    | + | 1130 | ACAGAGCTTTGTGGTAATC            | 19 | 17 |
| 12   | + | 1133 | GAGCTTTGTGGTAATCTCCA           | 21 | 20 |
| 1    | + | 1138 | TTGTGGTAATCTTCCATTGGGTCTCTGTGT | 30 | 4  |
| 142  | + | 1141 | TGGTAATCTTCCATTGGGTCTC         | 22 | 7  |
| 5    | + | 1142 | GGTAATCTTCCATTGGGTCTC          | 21 | 8  |
| 120  | + | 1144 | TAATCTTCCATTGGGTCTCTGT         | 22 | 10 |
| 16   | + | 1144 | TAATCTTCCATTGGGTCTCTG          | 21 | 10 |
| 105  | + | 1145 | AATCTTCCATTGGGTCTCTGT          | 21 | 11 |
| 11   | + | 1145 | AATCTTCCATTGGGTCTCTGTG         | 22 | 11 |
| 2    | + | 1145 | AATCTTCCATTGGGTCTCTGTGTC       | 24 | 11 |
| 51   | + | 1146 | ATCTTCCATTGGGTCTCTGTGT         | 22 | 12 |
| 66   | + | 1146 | ATCTTCCATTGGGTCTCTGTG          | 21 | 12 |
| 4    | + | 1147 | TCTTCCATTGGGTCTCTGTGT          | 21 | 13 |
| 97   | + | 1147 | TCTTCCATTGGGTCTCTGTGTC         | 22 | 13 |
| 2    | + | 1148 | CTTCCATTGGGTCTCTGTG            | 19 | 14 |
| 2    | + | 1148 | CTTCCATTGGGTCTCTGTGTCA         | 22 | 14 |
| 89   | + | 1148 | CTTCCATTGGGTCTCTGTGTC          | 21 | 14 |

|     |   |      |                          |    |    |
|-----|---|------|--------------------------|----|----|
| 16  | + | 1150 | TCCATTGGGTCTCTGTGTCAT    | 21 | 16 |
| 13  | + | 1151 | CCATTGGGTCTCTGTGTCATAGG  | 23 | 17 |
| 8   | + | 1151 | CCATTGGGTCTCTGTGTCATA    | 21 | 17 |
| 5   | + | 1152 | CATTGGGTCTCTGTGTCATAGG   | 22 | 18 |
| 529 | + | 1153 | ATTGGGTCTCTGTGTCATAGG    | 21 | 19 |
| 8   | + | 1153 | ATTGGGTCTCTGTGTCATAGGT   | 22 | 19 |
| 18  | + | 1154 | TTGGGTCTCTGTGTCATAGGTT   | 22 | 20 |
| 517 | + | 1154 | TTGGGTCTCTGTGTCATAGGT    | 21 | 20 |
| 6   | + | 1154 | TTGGGTCTCTGTGTCATAGG     | 20 | 20 |
| 1   | + | 1155 | TGGGTCTCTGTGTCATAGGT     | 20 | 0  |
| 345 | + | 1155 | TGGGTCTCTGTGTCATAGGTT    | 21 | 0  |
| 4   | + | 1156 | GGGTCTCTGTGTCATAGGTTTC   | 21 | 1  |
| 8   | + | 1158 | GTCTCTGTGTCATAGGTTTCAT   | 21 | 3  |
| 9   | + | 1158 | GTCTCTGTGTCATAGGTTTCATC  | 22 | 3  |
| 133 | + | 1159 | TCTCTGTGTCATAGGTTTCATC   | 21 | 4  |
| 9   | + | 1159 | TCTCTGTGTCATAGGTTTCAT    | 20 | 4  |
| 1   | + | 1160 | CTCTGTGTCATAGGTTTCAT     | 19 | 5  |
| 8   | + | 1160 | CTCTGTGTCATAGGTTTCATCT   | 21 | 5  |
| 48  | + | 1161 | TCTGTGTCATAGGTTTCATC     | 19 | 6  |
| 65  | + | 1161 | TCTGTGTCATAGGTTTCATCTT   | 21 | 6  |
| 13  | + | 1162 | CTGTGTCATAGGTTTCATCTTT   | 21 | 7  |
| 1   | + | 1162 | CTGTGTCATAGGTTTCATCTT    | 20 | 7  |
| 182 | + | 1163 | TGTGTCATAGGTTTCATCTTTA   | 21 | 8  |
| 9   | + | 1165 | TGTCATAGGTTTCATCTTTACA   | 21 | 10 |
| 59  | + | 1167 | TCATAGGTTTCATCTTTACACG   | 21 | 12 |
| 6   | + | 1167 | TCATAGGTTTCATCTTTACAC    | 20 | 12 |
| 99  | + | 1167 | TCATAGGTTTCATCTTTACACGG  | 22 | 12 |
| 1   | + | 1168 | CATAGGTTTCATCTTTACACGGG  | 22 | 13 |
| 85  | + | 1168 | CATAGGTTTCATCTTTACACGG   | 21 | 13 |
| 25  | + | 1169 | ATAGGTTTCATCTTTACACGGGA  | 22 | 14 |
| 365 | + | 1169 | ATAGGTTTCATCTTTACACGGG   | 21 | 14 |
| 2   | + | 1170 | TAGGTTTCATCTTTACACGGGAAA | 23 | 15 |
| 341 | + | 1170 | TAGGTTTCATCTTTACACGGGA   | 21 | 15 |
| 9   | + | 1170 | TAGGTTTCATCTTTACACGGGAA  | 22 | 15 |
| 5   | + | 1171 | AGGTTTCATCTTTACACGGGAAA  | 22 | 16 |
| 99  | + | 1171 | AGGTTTCATCTTTACACGGGAA   | 21 | 16 |
| 31  | + | 1172 | GGTTTCATCTTTACACGGGAAA   | 21 | 17 |
| 31  | + | 1172 | GGTTTCATCTTTACACGGGA     | 19 | 17 |
| 3   | + | 1176 | CATCTTTACACGGGAAAACCTG   | 21 | 0  |
| 219 | + | 1177 | ATCTTTACACGGGAAAACCTGA   | 21 | 1  |
| 6   | + | 1177 | ATCTTTACACGGGAAAAA       | 17 | 1  |
| 17  | + | 1178 | TCTTTACACGGGAAAACCTGAGG  | 22 | 2  |
| 19  | + | 1178 | TCTTTACACGGGAAAACCTGAG   | 21 | 2  |
| 74  | + | 1179 | CTTTACACGGGAAAACCTGAGGA  | 22 | 3  |

|      |   |      |                           |    |    |
|------|---|------|---------------------------|----|----|
| 8    | + | 1179 | CTTTACACGGGAAAACCTGAGG    | 21 | 3  |
| 2    | + | 1180 | TTTACACGGGAAAACCTGAGGATG  | 23 | 4  |
| 3312 | + | 1180 | TTTACACGGGAAAACCTGAGGA    | 21 | 4  |
| 3    | + | 1180 | TTTACACGGGAAAACCTGAGGAT   | 22 | 4  |
| 21   | + | 1181 | TTACACGGGAAAACCTGAGGAT    | 21 | 5  |
| 3    | + | 1181 | TTACACGGGAAAACCTGAGGA     | 20 | 5  |
| 4    | + | 1181 | TTACACGGGAAAACCTGAGGATGAG | 24 | 5  |
| 201  | + | 1182 | TACACGGGAAAACCTGAGGATG    | 21 | 6  |
| 10   | + | 1183 | ACACGGGAAAACCTGAGGATGAGTG | 24 | 7  |
| 10   | + | 1183 | ACACGGGAAAACCTGAGGATGA    | 21 | 7  |
| 55   | + | 1183 | ACACGGGAAAACCTGAGGATGAG   | 22 | 7  |
| 10   | + | 1184 | CACGGGAAAACCTGAGGATGAGT   | 22 | 8  |
| 673  | + | 1184 | CACGGGAAAACCTGAGGATGAG    | 21 | 8  |
| 11   | + | 1185 | ACGGGAAAACCTGAGGATGAGTG   | 22 | 9  |
| 1    | + | 1185 | ACGGGAAAACCTGAGGATGAG     | 20 | 9  |
| 32   | + | 1185 | ACGGGAAAACCTGAGGATGAGTGGG | 24 | 9  |
| 45   | + | 1185 | ACGGGAAAACCTGAGGATGAGT    | 21 | 9  |
| 461  | + | 1186 | CGGGAAAACCTGAGGATGAGTG    | 21 | 10 |
| 1    | + | 1187 | GGGAAAACCTGAGGATGAGTG     | 20 | 11 |
| 5    | + | 1188 | GGAAAACCTGAGGATGAGTGGGA   | 22 | 12 |
| 859  | + | 1188 | GGAAAACCTGAGGATGAGTGGG    | 21 | 12 |
| 1    | + | 1189 | GAAAACCTGAGGATGAGTGGGAA   | 22 | 13 |
| 90   | + | 1189 | GAAAACCTGAGGATGAGTGGGA    | 21 | 13 |
| 1    | + | 1190 | AAAACCTGAGGATGAGTGGGAAA   | 22 | 14 |
| 831  | + | 1190 | AAAACCTGAGGATGAGTGGGAA    | 21 | 14 |
| 1    | + | 1191 | AAACCTGAGGATGAGTGGGAA     | 20 | 15 |
| 61   | + | 1191 | AAACCTGAGGATGAGTGGGAAA    | 21 | 15 |
| 48   | + | 1192 | AACTGAGGATGAGTGGGAAAT     | 21 | 16 |
| 29   | + | 1193 | ACTGAGGATGAGTGGGAAATT     | 21 | 17 |
| 5    | + | 1193 | ACTGAGGATGAGTGGGAAATTT    | 22 | 17 |
| 1    | + | 1194 | CTGAGGATGAGTGGGAAATTTTA   | 23 | 18 |
| 59   | + | 1194 | CTGAGGATGAGTGGGAAATTTT    | 22 | 18 |
| 29   | + | 1195 | TGAGGATGAGTGGGAAATTTTA    | 22 | 19 |
| 82   | + | 1195 | TGAGGATGAGTGGGAAATTTT     | 21 | 19 |
| 2    | + | 1197 | AGGATGAGTGGGAAATTTTAA     | 21 | 0  |
| 127  | + | 1200 | ATGAGTGGGAAATTTTAATTC     | 21 | 3  |
| 165  | + | 1201 | TGAGTGGGAAATTTTAATTCGC    | 22 | 4  |
| 19   | + | 1201 | TGAGTGGGAAATTTTAATTCG     | 21 | 4  |
| 1    | + | 1201 | TGAGTGGGAAATTTTAATTCGCA   | 23 | 4  |
| 36   | + | 1202 | GAGTGGGAAATTTTAATTCGC     | 21 | 5  |
| 78   | + | 1203 | AGTGGGAAATTTTAATTCGCA     | 21 | 6  |
| 8    | + | 1204 | GTGGGAAATTTTAATTCGCAGA    | 22 | 7  |
| 23   | + | 1205 | TGGGAAATTTTAATTCGCAGAC    | 22 | 8  |
| 36   | + | 1205 | TGGGAAATTTTAATTCGCAGA     | 21 | 8  |

|     |   |      |                           |    |    |
|-----|---|------|---------------------------|----|----|
| 5   | + | 1205 | TGGGAAATTTTAATTCGCAGACT   | 23 | 8  |
| 3   | + | 1206 | GGGAAATTTTAATTCGCAGAC     | 21 | 9  |
| 4   | + | 1206 | GGGAAATTTTAATTCGCAGACTAGA | 25 | 9  |
| 112 | + | 1209 | AAATTTTAATTCGCAGACTAGA    | 22 | 12 |
| 18  | + | 1209 | AAATTTTAATTCGCAGACTAG     | 21 | 12 |
| 188 | + | 1210 | AATTTTAATTCGCAGACTAGA     | 21 | 13 |
| 109 | + | 1211 | ATTTTAATTCGCAGACTAGAAA    | 22 | 14 |
| 65  | + | 1211 | ATTTTAATTCGCAGACTAGAA     | 21 | 14 |
| 22  | + | 1212 | TTTTAATTCGCAGACTAGAAA     | 21 | 15 |
| 55  | + | 1212 | TTTTAATTCGCAGACTAGAAAT    | 22 | 15 |
| 258 | + | 1213 | TTTAATTCGCAGACTAGAAAT     | 21 | 16 |
| 54  | + | 1213 | TTTAATTCGCAGACTAGAAATT    | 22 | 16 |
| 421 | + | 1214 | TTAATTCGCAGACTAGAAATT     | 21 | 17 |
| 8   | + | 1214 | TTAATTCGCAGACTAGAAAT      | 20 | 17 |
| 44  | + | 1216 | AATTCGCAGACTAGAAATTAG     | 21 | 19 |
| 125 | + | 1217 | ATTCGCAGACTAGAAATTAGT     | 21 | 20 |
| 3   | + | 1217 | ATTCGCAGACTAGAAATTAG      | 20 | 20 |
| 7   | + | 1223 | AGACTAGAAATTAGTCTTGAT     | 21 | 5  |
| 11  | + | 1226 | CTAGAAATTAGTCTTGATCGAG    | 22 | 8  |
| 2   | + | 1226 | CTAGAAATTAGTCTTGATCGA     | 21 | 8  |
| 100 | + | 1227 | TAGAAATTAGTCTTGATCGAGA    | 22 | 9  |
| 48  | + | 1227 | TAGAAATTAGTCTTGATCGAG     | 21 | 9  |
| 212 | + | 1228 | AGAAATTAGTCTTGATCGAGA     | 21 | 10 |
| 4   | + | 1229 | GAAATTAGTCTTGATCGAGAT     | 21 | 11 |
| 276 | + | 1230 | AAATTAGTCTTGATCGAGATA     | 21 | 12 |
| 6   | + | 1231 | AATTAGTCTTGATCGAGATAA     | 21 | 13 |
| 36  | + | 1233 | TTAGTCTTGATCGAGATAACGA    | 22 | 15 |
| 24  | + | 1234 | TAGTCTTGATCGAGATAACGA     | 21 | 16 |
| 388 | + | 1235 | AGTCTTGATCGAGATAACGAG     | 21 | 17 |
| 8   | + | 1235 | AGTCTTGATCGAGATAACGAGGC   | 23 | 17 |
| 95  | + | 1235 | AGTCTTGATCGAGATAACGAGG    | 22 | 17 |
| 17  | + | 1236 | GTCTTGATCGAGATAACGAGG     | 21 | 18 |
| 24  | + | 1236 | GTCTTGATCGAGATAACGAGGC    | 22 | 18 |
| 430 | + | 1237 | TCTTGATCGAGATAACGAGGC     | 21 | 19 |
| 5   | + | 1237 | TCTTGATCGAGATAACGAGGCA    | 22 | 19 |
| 21  | + | 1238 | CTTGATCGAGATAACGAGGCA     | 21 | 20 |
| 3   | + | 1238 | CTTGATCGAGATAACGAGGC      | 20 | 20 |
| 7   | + | 1239 | TTGATCGAGATAACGAGGCAC     | 21 | 0  |
| 24  | + | 1241 | GATCGAGATAACGAGGCACAA     | 21 | 2  |
| 9   | + | 1242 | ATCGAGATAACGAGGCACAAC     | 21 | 3  |
| 10  | + | 1243 | TCGAGATAACGAGGCACAAC      | 21 | 4  |
| 5   | + | 1244 | CGAGATAACGAGGCACAACCTT    | 21 | 5  |
| 5   | + | 1246 | AGATAACGAGGCACAACCTTAGA   | 22 | 7  |
| 179 | + | 1248 | ATAACGAGGCACAACCTTAGAG    | 21 | 9  |

|      |   |      |                          |    |    |
|------|---|------|--------------------------|----|----|
| 3    | + | 1248 | ATAACGAGGCACAACCTTAGAGT  | 22 | 9  |
| 15   | + | 1249 | TAACGAGGCACAACCTTAGAGT   | 21 | 10 |
| 19   | + | 1249 | TAACGAGGCACAACCTTAGAGTT  | 22 | 10 |
| 2    | + | 1250 | AACGAGGCACAACCTTAGAGTT   | 21 | 11 |
| 1    | + | 1252 | CGAGGCACAACCTTAGAGTTGG   | 21 | 13 |
| 85   | + | 1252 | CGAGGCACAACCTTAGAGTTGGG  | 22 | 13 |
| 45   | + | 1253 | GAGGCACAACCTTAGAGTTGGG   | 21 | 14 |
| 9    | + | 1253 | GAGGCACAACCTTAGAGTTGGGT  | 22 | 14 |
| 14   | + | 1254 | AGGCACAACCTTAGAGTTGGGTA  | 22 | 15 |
| 6    | + | 1254 | AGGCACAACCTTAGAGTTGGGT   | 21 | 15 |
| 14   | + | 1255 | GGCACAACCTTAGAGTTGGGTA   | 21 | 16 |
| 1    | + | 1255 | GGCACAACCTTAGAGTTGGG     | 19 | 16 |
| 1    | + | 1256 | GCACAACCTTAGAGTTGGG      | 18 | 17 |
| 5    | + | 1256 | GCACAACCTTAGAGTTGGGTA    | 20 | 17 |
| 5    | + | 1258 | ACAACCTTAGAGTTGGGTATGAT  | 22 | 19 |
| 7    | + | 1258 | ACAACCTTAGAGTTGGGTATGA   | 21 | 19 |
| 213  | + | 1259 | CAACCTTAGAGTTGGGTATGAT   | 21 | 20 |
| 49   | + | 1260 | AACTTAGAGTTGGGTATGATAG   | 22 | 0  |
| 94   | + | 1260 | AACTTAGAGTTGGGTATGATA    | 21 | 0  |
| 168  | + | 1261 | ACTTAGAGTTGGGTATGATAGC   | 22 | 1  |
| 28   | + | 1261 | ACTTAGAGTTGGGTATGATAGCTT | 24 | 1  |
| 416  | + | 1261 | ACTTAGAGTTGGGTATGATAG    | 21 | 1  |
| 11   | + | 1262 | CTTAGAGTTGGGTATGATAGC    | 21 | 2  |
| 1    | + | 1262 | CTTAGAGTTGGGTATGATAGCTT  | 23 | 2  |
| 37   | + | 1262 | CTTAGAGTTGGGTATGATAGCT   | 22 | 2  |
| 1239 | + | 1263 | TTAGAGTTGGGTATGATAGCT    | 21 | 3  |
| 40   | + | 1263 | TTAGAGTTGGGTATGATAGCTT   | 22 | 3  |
| 5    | + | 1263 | TTAGAGTTGGGTATGATAG      | 19 | 3  |
| 8    | + | 1263 | TTAGAGTTGGGTATGATAGC     | 20 | 3  |
| 2    | + | 1264 | TAGAGTTGGGTATGATAGCTTA   | 22 | 4  |
| 914  | + | 1264 | TAGAGTTGGGTATGATAGCTT    | 21 | 4  |
| 6    | + | 1265 | AGAGTTGGGTATGATAGCTTA    | 21 | 5  |
| 2    | + | 1266 | GAGTTGGGTATGATAGCTTACATG | 24 | 6  |
| 475  | + | 1269 | TTGGGTATGATAGCTTACATG    | 21 | 9  |
| 16   | + | 1270 | TGGGTATGATAGCTTACATGA    | 21 | 10 |
| 21   | + | 1271 | GGGTATGATAGCTTACATGAG    | 21 | 11 |
| 33   | + | 1272 | GGTATGATAGCTTACATGAGA    | 21 | 12 |
| 3    | + | 1273 | GTATGATAGCTTACATGAGAA    | 21 | 13 |
| 5    | + | 1273 | GTATGATAGCTTACATGAGAAC   | 22 | 13 |
| 149  | + | 1274 | TATGATAGCTTACATGAGAACG   | 22 | 14 |
| 96   | + | 1274 | TATGATAGCTTACATGAGAAC    | 21 | 14 |
| 13   | + | 1275 | ATGATAGCTTACATGAGAACGA   | 22 | 15 |
| 59   | + | 1275 | ATGATAGCTTACATGAGAACG    | 21 | 15 |
| 132  | + | 1276 | TGATAGCTTACATGAGAACGA    | 21 | 16 |



|     |   |      |                           |    |    |
|-----|---|------|---------------------------|----|----|
| 66  | + | 1276 | TGATAGCTTACATGAGAACGAG    | 22 | 16 |
| 86  | + | 1277 | GATAGCTTACATGAGAACGAG     | 21 | 17 |
| 52  | + | 1278 | ATAGCTTACATGAGAACGAGCA    | 22 | 18 |
| 552 | + | 1278 | ATAGCTTACATGAGAACGAGC     | 21 | 18 |
| 5   | + | 1278 | ATAGCTTACATGAGAACGAG      | 20 | 18 |
| 2   | + | 1280 | AGCTTACATGAGAACGAGCAA     | 21 | 20 |
| 107 | + | 1283 | TTACATGAGAACGAGCAAGCT     | 21 | 2  |
| 1   | + | 1283 | TTACATGAGAACGAGCAAGCTT    | 22 | 2  |
| 9   | + | 1284 | TACATGAGAACGAGCAAGCTT     | 21 | 3  |
| 59  | + | 1285 | ACATGAGAACGAGCAAGCTTT     | 21 | 4  |
| 28  | + | 1296 | AGCAAGCTTTATTTCTCAGCA     | 21 | 15 |
| 4   | + | 1297 | GCAAGCTTTATTTCTCAGCAT     | 21 | 16 |
| 29  | + | 1302 | CTTTATTTCTCAGCATTGCAGT    | 22 | 0  |
| 68  | + | 1302 | CTTTATTTCTCAGCATTGCAG     | 21 | 0  |
| 142 | + | 1303 | TTTATTTCTCAGCATTGCAGT     | 21 | 1  |
| 4   | + | 1303 | TTTATTTCTCAGCATTGCAGTC    | 22 | 1  |
| 104 | + | 1304 | TTATTTCTCAGCATTGCAGTC     | 21 | 2  |
| 14  | + | 1305 | TATTTCTCAGCATTGCAGTCTT    | 22 | 3  |
| 29  | + | 1305 | TATTTCTCAGCATTGCAGTCT     | 21 | 3  |
| 47  | + | 1306 | ATTTCTCAGCATTGCAGTCTT     | 21 | 4  |
| 14  | + | 1307 | TTTCTCAGCATTGCAGTCTTCT    | 22 | 5  |
| 77  | + | 1307 | TTTCTCAGCATTGCAGTCTTC     | 21 | 5  |
| 13  | + | 1308 | TTCTCAGCATTGCAGTCTTCTT    | 22 | 6  |
| 8   | + | 1308 | TTCTCAGCATTGCAGTCTTCT     | 21 | 6  |
| 65  | + | 1309 | TCTCAGCATTGCAGTCTTCTT     | 21 | 7  |
| 23  | + | 1311 | TCAGCATTGCAGTCTTCTTCA     | 21 | 9  |
| 43  | + | 1312 | CAGCATTGCAGTCTTCTTCAA     | 21 | 10 |
| 29  | + | 1313 | AGCATTGCAGTCTTCTTCAAC     | 21 | 11 |
| 3   | + | 1315 | CATTGCAGTCTTCTTCAACTA     | 21 | 13 |
| 21  | + | 1321 | AGTCTTCTTCAACTATAAAGA     | 21 | 19 |
| 15  | + | 1323 | TCTTCTTCAACTATAAAGACC     | 21 | 0  |
| 23  | + | 1324 | CTTCTTCAACTATAAAGACCGT    | 22 | 1  |
| 24  | + | 1325 | TTCTTCAACTATAAAGACCGTC    | 22 | 2  |
| 8   | + | 1325 | TTCTTCAACTATAAAGACCGT     | 21 | 2  |
| 188 | + | 1326 | TCTTCAACTATAAAGACCGTC     | 21 | 3  |
| 1   | + | 1326 | TCTTCAACTATAAAGACCGTCA    | 22 | 3  |
| 6   | + | 1326 | TCTTCAACTATAAAGACCGTCAGCT | 25 | 3  |
| 7   | + | 1327 | CTTCAACTATAAAGACCGTCAG    | 22 | 4  |
| 208 | + | 1328 | TTCAACTATAAAGACCGTCAGC    | 22 | 5  |
| 39  | + | 1328 | TTCAACTATAAAGACCGTCAG     | 21 | 5  |
| 1   | + | 1329 | TCAACTATAAAGACCGTCA       | 19 | 6  |
| 227 | + | 1329 | TCAACTATAAAGACCGTCAGC     | 21 | 6  |
| 45  | + | 1329 | TCAACTATAAAGACCGTCAGCT    | 22 | 6  |
| 35  | + | 1330 | CAACTATAAAGACCGTCAGCT     | 21 | 7  |

|     |   |      |                          |    |    |
|-----|---|------|--------------------------|----|----|
| 37  | + | 1331 | AACTATAAAGACCGTCAGCTT    | 21 | 8  |
| 35  | + | 1332 | ACTATAAAGACCGTCAGCTTGT   | 22 | 9  |
| 3   | + | 1332 | ACTATAAAGACCGTCAGCTTGTGA | 24 | 9  |
| 96  | + | 1332 | ACTATAAAGACCGTCAGCTTG    | 21 | 9  |
| 6   | + | 1333 | CTATAAAGACCGTCAGCTTGT    | 21 | 10 |
| 122 | + | 1334 | TATAAAGACCGTCAGCTTGTG    | 21 | 11 |
| 2   | + | 1334 | TATAAAGACCGTCAGCTTGTGA   | 22 | 11 |
| 148 | + | 1335 | ATAAAGACCGTCAGCTTGTGA    | 21 | 12 |
| 22  | + | 1335 | ATAAAGACCGTCAGCTTGTGAT   | 22 | 12 |
| 12  | + | 1336 | TAAAGACCGTCAGCTTGTGATG   | 22 | 13 |
| 211 | + | 1336 | TAAAGACCGTCAGCTTGTGAT    | 21 | 13 |
| 4   | + | 1336 | TAAAGACCGTCAGCTTGTGA     | 20 | 13 |
| 176 | + | 1337 | AAAGACCGTCAGCTTGTGATG    | 21 | 14 |
| 1   | + | 1338 | AAGACCGTCAGCTTGTGATGGCCA | 24 | 15 |
| 23  | + | 1338 | AAGACCGTCAGCTTGTGATGG    | 21 | 15 |
| 25  | + | 1338 | AAGACCGTCAGCTTGTGATGGC   | 22 | 15 |
| 13  | + | 1344 | GTCAGCTTGTGATGGCCATGC    | 21 | 0  |
| 13  | + | 1345 | TCAGCTTGTGATGGCCATGCT    | 21 | 1  |
| 16  | + | 1346 | CAGCTTGTGATGGCCATGCTC    | 21 | 2  |
| 178 | + | 1349 | CTTGTGATGGCCATGCTCCTT    | 21 | 5  |
| 11  | + | 1350 | TTGTGATGGCCATGCTCCTTG    | 21 | 6  |
| 12  | + | 1350 | TTGTGATGGCCATGCTCCTT     | 20 | 6  |
| 3   | + | 1350 | TTGTGATGGCCATGCTCCTTGA   | 22 | 6  |
| 10  | + | 1351 | TGTGATGGCCATGCTCCTTGAC   | 22 | 7  |
| 66  | + | 1351 | TGTGATGGCCATGCTCCTTGA    | 21 | 7  |
| 1   | + | 1355 | ATGGCCATGCTCCTTGACAGT    | 21 | 11 |
| 10  | + | 1356 | TGGCCATGCTCCTTGACAGTAA   | 22 | 12 |
| 13  | + | 1356 | TGGCCATGCTCCTTGACAGTA    | 21 | 12 |
| 10  | + | 1358 | GCCATGCTCCTTGACAGTAAC    | 21 | 14 |
| 3   | + | 1359 | CCATGCTCCTTGACAGTAACCT   | 22 | 15 |
| 5   | + | 1360 | CATGCTCCTTGACAGTAACCTA   | 22 | 16 |
| 61  | + | 1360 | CATGCTCCTTGACAGTAACCT    | 21 | 16 |
| 13  | + | 1361 | ATGCTCCTTGACAGTAACCTA    | 21 | 17 |
| 18  | + | 1361 | ATGCTCCTTGACAGTAACCTAGA  | 23 | 17 |
| 63  | + | 1362 | TGCTCCTTGACAGTAACCTAGA   | 22 | 18 |
| 7   | + | 1362 | TGCTCCTTGACAGTAACCTAG    | 21 | 18 |
| 14  | + | 1364 | CTCCTTGACAGTAACCTAGATG   | 22 | 20 |
| 26  | + | 1365 | TCCTTGACAGTAACCTAGATG    | 21 | 0  |
| 8   | + | 1365 | TCCTTGACAGTAACCTAGATGT   | 22 | 0  |
| 35  | + | 1366 | CCTTGACAGTAACCTAGATGT    | 21 | 1  |
| 1   | + | 1367 | CTTGACAGTAACCTAGATGTC    | 21 | 2  |
| 3   | + | 1369 | TGACAGTAACCTAGATGTGCGAGT | 23 | 4  |
| 69  | + | 1370 | GACAGTAACCTAGATGTGCGAG   | 21 | 5  |
| 9   | + | 1370 | GACAGTAACCTAGATGTGCGAGT  | 22 | 5  |

|     |   |      |                           |    |    |
|-----|---|------|---------------------------|----|----|
| 114 | + | 1371 | ACAGTAACCTAGATGTTCGAGT    | 21 | 6  |
| 262 | + | 1371 | ACAGTAACCTAGATGTTCGAGTA   | 22 | 6  |
| 134 | + | 1372 | CAGTAACCTAGATGTTCGAGTA    | 21 | 7  |
| 5   | + | 1372 | CAGTAACCTAGATGTTCGAGT     | 20 | 7  |
| 15  | + | 1373 | AGTAACCTAGATGTTCGAGTA     | 20 | 8  |
| 31  | + | 1373 | AGTAACCTAGATGTTCGAGTAT    | 21 | 8  |
| 3   | + | 1373 | AGTAACCTAGATGTTCGAGTATG   | 22 | 8  |
| 153 | + | 1374 | GTAACCTAGATGTTCGAGTATGG   | 22 | 9  |
| 15  | + | 1374 | GTAACCTAGATGTTCGAGTATG    | 21 | 9  |
| 16  | + | 1375 | TAACCTAGATGTTCGAGTATGGG   | 22 | 10 |
| 1   | + | 1376 | AACCTAGATGTTCGAGTATGGGT   | 22 | 11 |
| 230 | + | 1376 | AACCTAGATGTTCGAGTATGGG    | 21 | 11 |
| 9   | + | 1376 | AACCTAGATGTTCGAGTATGG     | 20 | 11 |
| 9   | + | 1378 | CCTAGATGTTCGAGTATGGGTT    | 21 | 13 |
| 127 | + | 1380 | TAGATGTTCGAGTATGGGTTAAG   | 22 | 15 |
| 2   | + | 1380 | TAGATGTTCGAGTATGGGTTAA    | 21 | 15 |
| 4   | + | 1380 | TAGATGTTCGAGTATGGGTTA     | 20 | 15 |
| 3   | + | 1381 | AGATGTTCGAGTATGGGTTAAGAAC | 24 | 16 |
| 4   | + | 1381 | AGATGTTCGAGTATGGGTTAA     | 20 | 16 |
| 70  | + | 1381 | AGATGTTCGAGTATGGGTTAAGA   | 22 | 16 |
| 79  | + | 1381 | AGATGTTCGAGTATGGGTTAAG    | 21 | 16 |
| 9   | + | 1382 | GATGTTCGAGTATGGGTTAAGA    | 21 | 17 |
| 257 | + | 1383 | ATGTTCGAGTATGGGTTAAGAA    | 21 | 18 |
| 2   | + | 1383 | ATGTTCGAGTATGGGTTAAGAACC  | 23 | 18 |
| 1   | + | 1384 | TGTCGAGTATGGGTTAAGAA      | 20 | 19 |
| 8   | + | 1384 | TGTCGAGTATGGGTTAAGAAC     | 21 | 19 |
| 9   | + | 1384 | TGTCGAGTATGGGTTAAGAACC    | 22 | 19 |
| 11  | + | 1387 | CGAGTATGGGTTAAGAACCCT     | 21 | 1  |
| 1   | + | 1398 | TAAGAACCCTCGCCAATAAATCTCT | 25 | 12 |
| 2   | + | 1398 | TAAGAACCCTCGCCAATAAATCTC  | 24 | 12 |
| 45  | + | 1401 | GAACCCTCGCCAATAAATCTC     | 21 | 15 |
| 18  | + | 1402 | AACCCTCGCCAATAAATCTCT     | 21 | 16 |
| 1   | + | 1402 | AACCCTCGCCAATAAATCTCTA    | 22 | 16 |
| 3   | + | 1403 | ACCCTCGCCAATAAATCTCTA     | 21 | 17 |
| 7   | + | 1407 | TCGCCAATAAATCTCTAATAC     | 21 | 0  |
| 10  | + | 1417 | ATCTCTAATACATATATCTAGG    | 22 | 10 |
| 4   | + | 1417 | ATCTCTAATACATATATCTAG     | 21 | 10 |
| 51  | + | 1417 | ATCTCTAATACATATATCTAGGA   | 23 | 10 |
| 10  | + | 1418 | TCTCTAATACATATATCTAGGAAT  | 24 | 11 |
| 130 | + | 1418 | TCTCTAATACATATATCTAGGA    | 22 | 11 |
| 8   | + | 1418 | TCTCTAATACATATATCTAGG     | 21 | 11 |
| 128 | + | 1419 | CTCTAATACATATATCTAGGA     | 21 | 12 |
| 2   | + | 1420 | TCTAATACATATATCTAGGA      | 20 | 13 |
| 26  | + | 1421 | CTAATACATATATCTAGGAAT     | 21 | 14 |

|     |   |      |                          |    |    |
|-----|---|------|--------------------------|----|----|
| 81  | + | 1422 | TAATACATATATCTAGGAATG    | 21 | 15 |
| 8   | + | 1423 | AATACATATATCTAGGAATGA    | 21 | 16 |
| 37  | + | 1424 | ATACATATATCTAGGAATGAG    | 21 | 17 |
| 84  | + | 1424 | ATACATATATCTAGGAATGAGA   | 22 | 17 |
| 6   | + | 1429 | TATATCTAGGAATGAGAAAATAGT | 24 | 1  |
| 104 | + | 1430 | ATATCTAGGAATGAGAAAATA    | 21 | 2  |
| 128 | + | 1433 | TCTAGGAATGAGAAAATAGTG    | 21 | 5  |
| 6   | + | 1433 | TCTAGGAATGAGAAAATAGTGA   | 22 | 5  |
| 1   | + | 1434 | CTAGGAATGAGAAAATAGTGA    | 21 | 6  |
| 114 | + | 1435 | TAGGAATGAGAAAATAGTGATG   | 22 | 7  |
| 5   | + | 1436 | AGGAATGAGAAAATAGTGATG    | 21 | 8  |
| 7   | + | 1441 | TGAGAAAATAGTGATGCATAAC   | 22 | 13 |
| 5   | + | 1444 | GAAAATAGTGATGCATAACTT    | 21 | 16 |
| 17  | + | 1451 | GTGATGCATAACTTACTACAA    | 21 | 2  |
| 4   | + | 1451 | GTGATGCATAACTTACTACAAC   | 22 | 2  |
| 8   | + | 1454 | ATGCATAACTTACTACAACATG   | 22 | 5  |
| 6   | + | 1457 | CATAACTTACTACAACATGTG    | 21 | 8  |
| 14  | + | 1458 | ATAACTTACTACAACATGTGGG   | 22 | 9  |
| 63  | + | 1458 | ATAACTTACTACAACATGTGG    | 21 | 9  |
| 9   | + | 1459 | TAACTTACTACAACATGTGGG    | 21 | 10 |
| 3   | + | 1460 | AACTTACTACAACATGTGGG     | 20 | 11 |
| 3   | + | 1460 | AACTTACTACAACATGTGGGT    | 21 | 11 |
| 37  | + | 1463 | TTACTACAACATGTGGGTAGA    | 21 | 14 |
| 12  | + | 1467 | TACAACATGTGGGTAGACAAGC   | 22 | 18 |
| 9   | + | 1467 | TACAACATGTGGGTAGACAAG    | 21 | 18 |
| 43  | + | 1468 | ACAACATGTGGGTAGACAAGC    | 21 | 19 |
| 4   | + | 1468 | ACAACATGTGGGTAGACAAGCC   | 22 | 19 |
| 1   | + | 1469 | CAACATGTGGGTAGACAAGC     | 20 | 20 |
| 2   | + | 1469 | CAACATGTGGGTAGACAAGCC    | 21 | 20 |
| 153 | + | 1470 | AACATGTGGGTAGACAAGCCA    | 21 | 0  |
| 9   | + | 1471 | ACATGTGGGTAGACAAGCCATT   | 22 | 1  |
| 10  | + | 1476 | TGGGTAGACAAGCCATTCAA     | 21 | 6  |
| 1   | + | 1476 | TGGGTAGACAAGCCATTCAA     | 20 | 6  |
| 27  | + | 1476 | TGGGTAGACAAGCCATTCAAAG   | 22 | 6  |
| 7   | + | 1477 | GGGTAGACAAGCCATTCAAAGA   | 22 | 7  |
| 2   | + | 1478 | GGTAGACAAGCCATTCAAAGA    | 21 | 8  |
| 79  | + | 1479 | GTAGACAAGCCATTCAAAGAC    | 21 | 9  |
| 4   | + | 1480 | TAGACAAGCCATTCAAAGACA    | 21 | 10 |
| 6   | + | 1480 | TAGACAAGCCATTCAAAGAC     | 20 | 10 |
| 3   | + | 1483 | ACAAGCCATTCAAAGACAAGA    | 21 | 13 |
| 4   | + | 1484 | CAAGCCATTCAAAGACAAGA     | 20 | 14 |
| 240 | + | 1486 | AGCCATTCAAAGACAAGAACCT   | 22 | 16 |
| 5   | + | 1486 | AGCCATTCAAAGACAAGAAC     | 21 | 16 |
| 4   | + | 1487 | GCCATTCAAAGACAAGAACCTT   | 22 | 17 |

|     |   |      |                         |    |    |
|-----|---|------|-------------------------|----|----|
| 52  | + | 1487 | GCCATTCAAAGACAAGAACCT   | 21 | 17 |
| 19  | + | 1488 | CCATTCAAAGACAAGAACCTT   | 21 | 18 |
| 36  | + | 1490 | ATTCAAAGACAAGAACCTTGG   | 21 | 20 |
| 184 | + | 1491 | TTCAAAGACAAGAACCTTGGA   | 21 | 0  |
| 31  | + | 1492 | TCAAAGACAAGAACCTTGGAA   | 21 | 1  |
| 15  | + | 1494 | AAAGACAAGAACCTTGGAAACG  | 22 | 3  |
| 6   | + | 1494 | AAAGACAAGAACCTTGGAAACGC | 23 | 3  |
| 75  | + | 1494 | AAAGACAAGAACCTTGGAAAC   | 21 | 3  |
| 15  | + | 1495 | AAGACAAGAACCTTGGAAACG   | 21 | 4  |
| 2   | + | 1495 | AAGACAAGAACCTTGGAAACGC  | 22 | 4  |
| 47  | + | 1496 | AGACAAGAACCTTGGAAACGC   | 21 | 5  |
| 94  | + | 1497 | GACAAGAACCTTGGAAACGCC   | 21 | 6  |
| 1   | + | 1498 | ACAAGAACCTTGGAAACGCC    | 20 | 7  |
| 4   | + | 1498 | ACAAGAACCTTGGAAACGCCAC  | 22 | 7  |
| 7   | + | 1498 | ACAAGAACCTTGGAAACGCCA   | 21 | 7  |
| 9   | + | 1500 | AAGAACCTTGGAAACGCCACA   | 21 | 9  |
| 6   | + | 1501 | AGAACCTTGGAAACGCCACATC  | 22 | 10 |
| 34  | + | 1503 | AACCTTGGAAACGCCACATCTT  | 22 | 12 |
| 3   | + | 1504 | ACCTTGGAAACGCCACATCTT   | 21 | 13 |
| 3   | + | 1507 | TTGGAAACGCCACATCTTAATA  | 22 | 16 |
| 1   | + | 1510 | GAAACGCCACATCTTAATAGA   | 21 | 19 |
| 9   | + | 1519 | CATCTTAATAGATGCTGACGA   | 21 | 7  |
| 36  | + | 1520 | ATCTTAATAGATGCTGACGAG   | 21 | 8  |
| 21  | + | 1521 | TCTTAATAGATGCTGACGAGA   | 21 | 9  |
| 36  | + | 1521 | TCTTAATAGATGCTGACGAGAT  | 22 | 9  |
| 30  | + | 1522 | CTTAATAGATGCTGACGAGAT   | 21 | 10 |
| 11  | + | 1523 | TTAATAGATGCTGACGAGATAT  | 22 | 11 |
| 19  | + | 1523 | TTAATAGATGCTGACGAGATA   | 21 | 11 |
| 4   | + | 1524 | TAATAGATGCTGACGAGATAT   | 21 | 12 |
| 29  | + | 1525 | AATAGATGCTGACGAGATATG   | 21 | 13 |
| 22  | + | 1526 | ATAGATGCTGACGAGATATGCA  | 22 | 14 |
| 66  | + | 1526 | ATAGATGCTGACGAGATATGC   | 21 | 14 |
| 55  | + | 1527 | TAGATGCTGACGAGATATGCA   | 21 | 15 |
| 6   | + | 1528 | AGATGCTGACGAGATATGCAA   | 21 | 16 |
| 42  | + | 1530 | ATGCTGACGAGATATGCAATG   | 21 | 18 |
| 26  | + | 1531 | TGCTGACGAGATATGCAATGTC  | 22 | 19 |
| 3   | + | 1531 | TGCTGACGAGATATGCAATGT   | 21 | 19 |
| 4   | + | 1532 | GCTGACGAGATATGCAATGTC   | 21 | 20 |
| 33  | + | 1533 | CTGACGAGATATGCAATGTCCT  | 22 | 0  |
| 12  | + | 1534 | TGACGAGATATGCAATGTCCTT  | 22 | 1  |
| 6   | + | 1534 | TGACGAGATATGCAATGTCCT   | 21 | 1  |
| 16  | + | 1536 | ACGAGATATGCAATGTCCTTG   | 21 | 3  |
| 2   | + | 1537 | CGAGATATGCAATGTCCTTGAA  | 22 | 4  |
| 3   | + | 1538 | GAGATATGCAATGTCCTTGAA   | 21 | 5  |

|     |   |      |                           |    |    |
|-----|---|------|---------------------------|----|----|
| 2   | + | 1541 | ATATGCAATGTCCTTGAAAAT     | 21 | 8  |
| 76  | + | 1541 | ATATGCAATGTCCTTGAAAATG    | 22 | 8  |
| 22  | + | 1542 | TATGCAATGTCCTTGAAAATGA    | 22 | 9  |
| 213 | + | 1543 | ATGCAATGTCCTTGAAAATGA     | 21 | 10 |
| 1   | + | 1544 | TGCAATGTCCTTGAAAATGAT     | 21 | 11 |
| 4   | + | 1544 | TGCAATGTCCTTGAAAATGATA    | 22 | 11 |
| 28  | + | 1568 | GATGCTAGAATTGTGTCAGGG     | 21 | 14 |
| 1   | + | 1569 | ATGCTAGAATTGTGTCAGGGAT    | 22 | 15 |
| 377 | + | 1569 | ATGCTAGAATTGTGTCAGGGGA    | 21 | 15 |
| 1   | + | 1570 | TGCTAGAATTGTGTCAGGGGA     | 20 | 16 |
| 20  | + | 1570 | TGCTAGAATTGTGTCAGGGAT     | 21 | 16 |
| 9   | + | 1570 | TGCTAGAATTGTGTCAGGGATA    | 22 | 16 |
| 2   | + | 1571 | GCTAGAATTGTGTCAGGGATA     | 21 | 17 |
| 5   | + | 1571 | GCTAGAATTGTGTCAGGGGA      | 19 | 17 |
| 1   | + | 1572 | CTAGAATTGTGTCAGGGATATC    | 22 | 18 |
| 93  | + | 1573 | TAGAATTGTGTCAGGGATATC     | 21 | 19 |
| 1   | + | 1575 | GAATTGTGTCAGGGATATCATT    | 22 | 0  |
| 4   | + | 1575 | GAATTGTGTCAGGGATATCATTGAT | 26 | 0  |
| 6   | + | 1575 | GAATTGTGTCAGGGATATC       | 19 | 0  |
| 8   | + | 1575 | GAATTGTGTCAGGGATATCAT     | 21 | 0  |
| 110 | + | 1576 | AATTGTGTCAGGGATATCATT     | 21 | 1  |
| 36  | + | 1576 | AATTGTGTCAGGGATATCATTT    | 22 | 1  |
| 103 | + | 1577 | ATTGTGTCAGGGATATCATTT     | 21 | 2  |
| 1   | + | 1577 | ATTGTGTCAGGGATATC         | 17 | 2  |
| 10  | + | 1578 | TTGTGTCAGGGATATCATTTG     | 21 | 3  |
| 48  | + | 1578 | TTGTGTCAGGGATATCATTTGA    | 22 | 3  |
| 36  | + | 1579 | TGTGTCAGGGATATCATTTGA     | 21 | 4  |
| 7   | + | 1579 | TGTGTCAGGGATATCATTTGAT    | 22 | 4  |
| 37  | + | 1580 | GTGTCAGGGATATCATTTGAT     | 21 | 5  |
| 48  | + | 1581 | TGTCAGGGATATCATTTGATA     | 21 | 6  |
| 43  | + | 1583 | TCAGGGATATCATTTGATATA     | 21 | 8  |
| 7   | + | 1589 | ATATCATTTGATATATCCAGA     | 21 | 14 |
| 16  | + | 1592 | TCATTTGATATATCCAGAATC     | 21 | 17 |
| 18  | + | 1592 | TCATTTGATATATCCAGAATCGGC  | 24 | 17 |
| 7   | + | 1594 | ATTTGATATATCCAGAATCGGC    | 22 | 19 |
| 8   | + | 1594 | ATTTGATATATCCAGAATCGG     | 21 | 19 |
| 41  | + | 1595 | TTTGATATATCCAGAATCGGC     | 21 | 20 |
| 7   | + | 1595 | TTTGATATATCCAGAATCGGCG    | 22 | 20 |
| 57  | + | 1596 | TTGATATATCCAGAATCGGCGA    | 22 | 0  |
| 5   | + | 1596 | TTGATATATCCAGAATCGGCG     | 21 | 0  |
| 1   | + | 1597 | TGATATATCCAGAATCGGCGAA    | 22 | 1  |
| 3   | + | 1597 | TGATATATCCAGAATCGGCGAAGT  | 24 | 1  |
| 49  | + | 1597 | TGATATATCCAGAATCGGCGA     | 21 | 1  |
| 9   | + | 1598 | GATATATCCAGAATCGGCGAA     | 21 | 2  |

|      |   |      |                        |    |    |
|------|---|------|------------------------|----|----|
| 137  | + | 1599 | ATATATCCAGAATCGGCGAAG  | 21 | 3  |
| 3    | + | 1599 | ATATATCCAGAATCGGCGAAGT | 22 | 3  |
| 174  | + | 1600 | TATATCCAGAATCGGCGAAGTT | 22 | 4  |
| 39   | + | 1600 | TATATCCAGAATCGGCGAAGT  | 21 | 4  |
| 237  | + | 1601 | ATATCCAGAATCGGCGAAGTT  | 21 | 5  |
| 24   | + | 1601 | ATATCCAGAATCGGCGAAGTTT | 22 | 5  |
| 2    | + | 1602 | TATCCAGAATCGGCGAAGTT   | 20 | 6  |
| 35   | + | 1602 | TATCCAGAATCGGCGAAGTTTT | 22 | 6  |
| 88   | + | 1602 | TATCCAGAATCGGCGAAGTTT  | 21 | 6  |
| 10   | + | 1603 | ATCCAGAATCGGCGAAGTTTT  | 21 | 7  |
| 38   | + | 1604 | TCCAGAATCGGCGAAGTTTTTT | 22 | 8  |
| 57   | + | 1604 | TCCAGAATCGGCGAAGTTTTTT | 21 | 8  |
| 57   | + | 1607 | AGAATCGGCGAAGTTTTTTTA  | 21 | 11 |
| 87   | + | 1609 | AATCGGCGAAGTTTTTTTAAG  | 21 | 13 |
| 16   | + | 1610 | ATCGGCGAAGTTTTTTTAAGCG | 22 | 14 |
| 85   | + | 1610 | ATCGGCGAAGTTTTTTTAAGC  | 21 | 14 |
| 1    | + | 1611 | TCGGCGAAGTTTTTTTAAGCGA | 22 | 15 |
| 21   | + | 1611 | TCGGCGAAGTTTTTTTAAGCG  | 21 | 15 |
| 29   | + | 1612 | CGGCGAAGTTTTTTTAAGCGA  | 21 | 16 |
| 3    | + | 1612 | CGGCGAAGTTTTTTTAAGCGAG | 22 | 16 |
| 3    | + | 1613 | GGCGAAGTTTTTTTAAGCGAGA | 22 | 17 |
| 4    | + | 1617 | AAGTTTTTTTAAGCGAGAGAG  | 21 | 0  |
| 3    | + | 1619 | GTTTTTTTAAGCGAGAGAGCT  | 21 | 2  |
| 6    | + | 1625 | TTAAGCGAGAGAGCTTTTAAA  | 21 | 8  |
| 12   | + | 1632 | AGAGAGCTTTTAAAAGATTGT  | 21 | 15 |
| 3    | + | 1633 | GAGAGCTTTTAAAAGATTGTGT | 22 | 16 |
| 3    | + | 1634 | AGAGCTTTTAAAAGATTGTGTA | 22 | 17 |
| 4    | + | 1637 | GCTTTTAAAAGATTGTGTAAT  | 21 | 20 |
| 3    | + | 1649 | TTGTGTAATCTCCAATTCCTC  | 21 | 11 |
| 1    | + | 1650 | TGTGTAATCTCCAATTCCT    | 19 | 12 |
| 36   | + | 1650 | TGTGTAATCTCCAATTCCTCAG | 22 | 12 |
| 3    | + | 1651 | GTGTAATCTCCAATTCCTCAG  | 21 | 13 |
| 16   | + | 1652 | TGTAATCTCCAATTCCTCAGG  | 21 | 14 |
| 65   | + | 1652 | TGTAATCTCCAATTCCTCAGGG | 22 | 14 |
| 13   | + | 1653 | GTAATCTCCAATTCCTCAGGG  | 21 | 15 |
| 49   | + | 1654 | TAATCTCCAATTCCTCAGGGTG | 22 | 16 |
| 7    | + | 1654 | TAATCTCCAATTCCTCAGGGT  | 21 | 16 |
| 3    | + | 1656 | ATCTCCAATTCCTCAGGGTGT  | 21 | 18 |
| 10   | + | 1657 | TCTCCAATTCCTCAGGGTGTT  | 21 | 19 |
| 82   | + | 1662 | AATTCCTCAGGGTGTTTAAGA  | 21 | 3  |
| 42   | + | 1664 | TTCCTCAGGGTGTTTAAGACT  | 21 | 5  |
| 5    | + | 1664 | TTCCTCAGGGTGTTTAAGACTG | 22 | 5  |
| 83   | + | 1665 | TCCTCAGGGTGTTTAAGACTG  | 21 | 6  |
| 1015 | + | 1667 | CTCAGGGTGTTTAAGACTGGA  | 21 | 8  |

|     |   |      |                         |    |    |
|-----|---|------|-------------------------|----|----|
| 1   | + | 1667 | CTCAGGGTGTTTAAGACTGGAT  | 22 | 8  |
| 1   | + | 1668 | TCAGGGTGTTTAAGACTGGA    | 20 | 9  |
| 25  | + | 1668 | TCAGGGTGTTTAAGACTGGATA  | 22 | 9  |
| 9   | + | 1668 | TCAGGGTGTTTAAGACTGGAT   | 21 | 9  |
| 25  | + | 1669 | CAGGGTGTTTAAGACTGGATA   | 21 | 10 |
| 1   | + | 1670 | AGGGTGTTTAAGACTGGATATGA | 23 | 11 |
| 24  | + | 1670 | AGGGTGTTTAAGACTGGATATG  | 22 | 11 |
| 4   | + | 1670 | AGGGTGTTTAAGACTGGATAT   | 21 | 11 |
| 1   | + | 1671 | GGGTGTTTAAGACTGGATATG   | 21 | 12 |
| 4   | + | 1671 | GGGTGTTTAAGACTGGATATGA  | 22 | 12 |
| 3   | + | 1672 | GGTGTTTAAGACTGGATATGAT  | 22 | 13 |
| 5   | + | 1672 | GGTGTTTAAGACTGGATATGA   | 21 | 13 |
| 129 | + | 1673 | GTGTTTAAGACTGGATATGAT   | 21 | 14 |
| 4   | + | 1673 | GTGTTTAAGACTGGATATGATG  | 22 | 14 |
| 14  | + | 1674 | TGTTTAAGACTGGATATGATGA  | 22 | 15 |
| 175 | + | 1674 | TGTTTAAGACTGGATATGATG   | 21 | 15 |
| 97  | + | 1675 | GTTTAAGACTGGATATGATGA   | 21 | 16 |
| 32  | + | 1676 | TTTAAGACTGGATATGATGAAA  | 22 | 17 |
| 99  | + | 1676 | TTTAAGACTGGATATGATGAA   | 21 | 17 |
| 112 | + | 1677 | TTAAGACTGGATATGATGAAA   | 21 | 18 |
| 12  | + | 1677 | TTAAGACTGGATATGATGAAAA  | 22 | 18 |
| 39  | + | 1678 | TAAGACTGGATATGATGAAAA   | 21 | 19 |
| 2   | + | 1679 | AAGACTGGATATGATGAAAAAAC | 24 | 20 |
| 5   | + | 1679 | AAGACTGGATATGATGAAAAA   | 21 | 20 |
| 173 | + | 1680 | AGACTGGATATGATGAAAAAA   | 21 | 0  |
| 117 | + | 1682 | ACTGGATATGATGAAAAAAC    | 21 | 2  |
| 2   | + | 1684 | TGGATATGATGAAAAAACAG    | 21 | 4  |
| 33  | + | 1684 | TGGATATGATGAAAAAACAGA   | 22 | 4  |
| 11  | + | 1686 | GATATGATGAAAAAACAGAG    | 21 | 6  |
| 18  | + | 1687 | ATATGATGAAAAAACAGAGT    | 21 | 7  |
| 3   | + | 1689 | ATGATGAAAAAACAGAGTGC    | 21 | 9  |
| 17  | + | 1690 | TGATGAAAAAACAGAGTGCGC   | 22 | 10 |
| 2   | + | 1690 | TGATGAAAAAACAGAGTGCG    | 21 | 10 |
| 5   | + | 1690 | TGATGAAAAAACAGAGTGCGCA  | 23 | 10 |
| 15  | + | 1691 | GATGAAAAAACAGAGTGCGC    | 21 | 11 |
| 8   | + | 1691 | GATGAAAAAACAGAGTGCGCA   | 22 | 11 |
| 335 | + | 1692 | ATGAAAAAACAGAGTGCGCA    | 21 | 12 |
| 4   | + | 1696 | AAAAACAGAGTGCGCATAACC   | 21 | 16 |
| 24  | + | 1697 | AAAAACAGAGTGCGCATAACCG  | 21 | 17 |
| 149 | + | 1698 | AAAACAGAGTGCGCATAACCGG  | 21 | 18 |
| 84  | + | 1698 | AAAACAGAGTGCGCATAACCGGA | 22 | 18 |
| 1   | + | 1699 | AAACAGAGTGCGCATAACCGGAG | 22 | 19 |
| 70  | + | 1699 | AAACAGAGTGCGCATAACCGGA  | 21 | 19 |
| 3   | + | 1700 | AACAGAGTGCGCATAACCGGAGA | 22 | 20 |



|     |   |      |                           |    |    |
|-----|---|------|---------------------------|----|----|
| 65  | + | 1700 | AACAGAGTGCGCATACCGGAG     | 21 | 20 |
| 396 | + | 1701 | ACAGAGTGCGCATACCGGAGA     | 21 | 0  |
| 63  | + | 1702 | CAGAGTGCGCATACCGGAGAA     | 21 | 1  |
| 18  | + | 1703 | AGAGTGCGCATACCGGAGAACA    | 22 | 2  |
| 35  | + | 1703 | AGAGTGCGCATACCGGAGAAC     | 21 | 2  |
| 12  | + | 1705 | AGTGCGCATACCGGAGAACAT     | 21 | 4  |
| 6   | + | 1706 | GTGCGCATACCGGAGAACATGG    | 22 | 5  |
| 113 | + | 1707 | TGCGCATACCGGAGAACATGGA    | 22 | 6  |
| 59  | + | 1707 | TGCGCATACCGGAGAACATGG     | 21 | 6  |
| 125 | + | 1708 | GCGCATACCGGAGAACATGGA     | 21 | 7  |
| 5   | + | 1708 | GCGCATACCGGAGAACATGGAG    | 22 | 7  |
| 17  | + | 1709 | CGCATACCGGAGAACATGGAG     | 21 | 8  |
| 58  | + | 1709 | CGCATACCGGAGAACATGGAGT    | 22 | 8  |
| 14  | + | 1710 | GCATACCGGAGAACATGGAGTT    | 22 | 9  |
| 31  | + | 1710 | GCATACCGGAGAACATGGAGT     | 21 | 9  |
| 135 | + | 1711 | CATACCGGAGAACATGGAGTT     | 21 | 10 |
| 5   | + | 1711 | CATACCGGAGAACATGGAGTTTC   | 23 | 10 |
| 14  | + | 1712 | ATACCGGAGAACATGGAGTTTC    | 22 | 11 |
| 78  | + | 1712 | ATACCGGAGAACATGGAGTTT     | 21 | 11 |
| 178 | + | 1713 | TACCGGAGAACATGGAGTTTC     | 21 | 12 |
| 1   | + | 1713 | TACCGGAGAACATGGAGTTT      | 20 | 12 |
| 5   | + | 1713 | TACCGGAGAACATGGAGTTTCC    | 22 | 12 |
| 12  | + | 1714 | ACCGGAGAACATGGAGTTTCC     | 21 | 13 |
| 1   | + | 1715 | CCGGAGAACATGGAGTTTCCAC    | 22 | 14 |
| 8   | + | 1715 | CCGGAGAACATGGAGTTTC       | 19 | 14 |
| 22  | + | 1720 | GAACATGGAGTTTCCACCTCGTCTA | 25 | 19 |
| 12  | + | 1721 | AACATGGAGTTTCCACCTCGT     | 21 | 20 |
| 4   | + | 1721 | AACATGGAGTTTCCACCTCGTC    | 22 | 20 |
| 54  | + | 1722 | ACATGGAGTTTCCACCTCGTC     | 21 | 0  |
| 19  | + | 1724 | ATGGAGTTTCCACCTCGTCTA     | 21 | 2  |
| 7   | + | 1734 | CACCTCGTCTAAGGTTACTAC     | 21 | 12 |
| 26  | + | 1736 | CCTCGTCTAAGGTTACTACAG     | 21 | 14 |
| 62  | + | 1737 | CTCGTCTAAGGTTACTACAGT     | 21 | 15 |
| 4   | + | 1738 | TCGTCTAAGGTTACTACAGTGG    | 22 | 16 |
| 9   | + | 1738 | TCGTCTAAGGTTACTACAGTG     | 21 | 16 |
| 17  | + | 1739 | CGTCTAAGGTTACTACAGTGG     | 21 | 17 |
| 28  | + | 1740 | GTCTAAGGTTACTACAGTGGG     | 21 | 18 |
| 75  | + | 1741 | TCTAAGGTTACTACAGTGGGA     | 21 | 19 |
| 59  | + | 1743 | TAAGGTTACTACAGTGGGAAG     | 21 | 0  |
| 9   | + | 1743 | TAAGGTTACTACAGTGGGAAGC    | 22 | 0  |
| 18  | + | 1745 | AGGTTACTACAGTGGGAAGCA     | 21 | 2  |
| 1   | + | 1748 | TTACTACAGTGGGAAGCATATC    | 22 | 5  |
| 24  | + | 1751 | CTACAGTGGGAAGCATATCCG     | 21 | 8  |
| 2   | + | 1753 | ACAGTGGGAAGCATATCCGAGG    | 22 | 10 |

|     |   |      |                          |    |    |
|-----|---|------|--------------------------|----|----|
| 13  | + | 1754 | CAGTGGGAAGCATATCCGAGG    | 21 | 11 |
| 1   | + | 1754 | CAGTGGGAAGCATATCCGAGGA   | 22 | 11 |
| 2   | + | 1754 | CAGTGGGAAGCATATCCGAGGAGA | 24 | 11 |
| 506 | + | 1755 | AGTGGGAAGCATATCCGAGGA    | 21 | 12 |
| 5   | + | 1755 | AGTGGGAAGCATATCCGAGG     | 20 | 12 |
| 19  | + | 1756 | GTGGGAAGCATATCCGAGGAG    | 21 | 13 |
| 3   | + | 1756 | GTGGGAAGCATATCCGAGGAGA   | 22 | 13 |
| 56  | + | 1757 | TGGGAAGCATATCCGAGGAGAA   | 22 | 14 |
| 80  | + | 1757 | TGGGAAGCATATCCGAGGAGA    | 21 | 14 |
| 3   | + | 1758 | GGGAAGCATATCCGAGGAGAA    | 21 | 15 |
| 6   | + | 1758 | GGGAAGCATATCCGAGGAGA     | 20 | 15 |
| 8   | + | 1758 | GGGAAGCATATCCGAGG        | 17 | 15 |
| 3   | + | 1760 | GAAGCATATCCGAGGAGAAGTC   | 22 | 17 |
| 38  | + | 1761 | AAGCATATCCGAGGAGAAGTC    | 21 | 18 |
| 3   | + | 1762 | AGCATATCCGAGGAGAAGTCTT   | 22 | 19 |
| 9   | + | 1762 | AGCATATCCGAGGAGAAGTCT    | 21 | 19 |
| 19  | + | 1763 | GCATATCCGAGGAGAAGTCTT    | 21 | 20 |
| 38  | + | 1765 | ATATCCGAGGAGAAGTCTTTC    | 21 | 1  |
| 5   | + | 1765 | ATATCCGAGGAGAAGTC        | 17 | 1  |
| 1   | + | 1766 | TATCCGAGGAGAAGTCTTTCTC   | 22 | 2  |
| 11  | + | 1778 | AGTCTTTCTCTTAAACTTAAC    | 21 | 14 |
| 26  | + | 1782 | TTTCTCTTAAACTTAACCTGG    | 21 | 18 |
| 142 | + | 1783 | TTCTCTTAAACTTAACCTGGA    | 21 | 19 |
| 1   | + | 1783 | TTCTCTTAAACTTAACCTGGAA   | 22 | 19 |
| 31  | + | 1784 | TCTCTTAAACTTAACCTGGAA    | 21 | 20 |
| 5   | + | 1785 | CTCTTAAACTTAACCTGGAATA   | 22 | 0  |
| 8   | + | 1785 | CTCTTAAACTTAACCTGGAAT    | 21 | 0  |
| 12  | + | 1786 | TCTTAAACTTAACCTGGAATA    | 21 | 1  |
| 65  | + | 1786 | TCTTAAACTTAACCTGGA       | 18 | 1  |
| 16  | + | 1787 | CTTAAACTTAACCTGGAATAT    | 21 | 2  |
| 2   | + | 1790 | AAACTTAACCTGGAATATCTT    | 21 | 5  |
| 5   | + | 1791 | AACTTAACCTGGAATATCTTG    | 21 | 6  |
| 10  | + | 1792 | ACTTAACCTGGAATATCTTGT    | 21 | 7  |
| 13  | + | 1793 | CTTAACCTGGAATATCTTGTC    | 21 | 8  |
| 28  | + | 1794 | TTAACCTGGAATATCTTGTCG    | 21 | 9  |
| 355 | + | 1794 | TTAACCTGGAATATCTTGTCGA   | 22 | 9  |
| 7   | + | 1795 | TAACCTGGAATATCTTG        | 17 | 10 |
| 16  | + | 1796 | AACCTGGAATATCTTGTCGAA    | 21 | 11 |
| 22  | + | 1797 | ACCTGGAATATCTTGTCGAAC    | 21 | 12 |
| 26  | + | 1799 | CTGGAATATCTTGTCGAACTT    | 21 | 14 |
| 11  | + | 1800 | TGGAATATCTTGTCGAACTTGA   | 22 | 15 |
| 206 | + | 1800 | TGGAATATCTTGTCGAACTTG    | 21 | 15 |
| 1   | + | 1801 | GGAATATCTTGTCGAACTTG     | 20 | 16 |
| 20  | + | 1801 | GGAATATCTTGTCGAACTTGA    | 21 | 16 |

|     |   |      |                          |    |    |
|-----|---|------|--------------------------|----|----|
| 3   | + | 1802 | GAATATCTTGTCGAACTTGAT    | 21 | 17 |
| 6   | + | 1803 | AATATCTTGTCGAACTTGATA    | 21 | 18 |
| 10  | + | 1805 | TATCTTGTCGAACTTGATATG    | 21 | 20 |
| 8   | + | 1806 | ATCTTGTCGAACTTGATATGG    | 21 | 0  |
| 713 | + | 1807 | TCTTGTCGAACTTGATATGGA    | 21 | 1  |
| 4   | + | 1808 | CTTGTCGAACTTGATATGGAA    | 21 | 2  |
| 48  | + | 1809 | TTGTCGAACTTGATATGGAAGG   | 22 | 3  |
| 99  | + | 1809 | TTGTCGAACTTGATATGGAAG    | 21 | 3  |
| 14  | + | 1811 | GTCGAACTTGATATGGAAGGT    | 21 | 5  |
| 2   | + | 1811 | GTCGAACTTGATATGGAAGG     | 20 | 5  |
| 21  | + | 1812 | TCGAACTTGATATGGAAGGTA    | 21 | 6  |
| 4   | + | 1813 | CGAACTTGATATGGAAGGTAG    | 21 | 7  |
| 9   | + | 1813 | CGAACTTGATATGGAAGGTAGC   | 22 | 7  |
| 11  | + | 1814 | GAACTTGATATGGAAGGTAGC    | 21 | 8  |
| 30  | + | 1814 | GAACTTGATATGGAAGGTAGCC   | 22 | 8  |
| 29  | + | 1815 | AACTTGATATGGAAGGTAGCC    | 21 | 9  |
| 22  | + | 1816 | ACTTGATATGGAAGGTAGCCT    | 21 | 10 |
| 17  | + | 1817 | CTTGATATGGAAGGTAGCCTG    | 21 | 11 |
| 369 | + | 1818 | TTGATATGGAAGGTAGCCTGC    | 21 | 12 |
| 41  | + | 1818 | TTGATATGGAAGGTAGCCTGCT   | 22 | 12 |
| 1   | + | 1819 | TGATATGGAAGGTAGCC        | 17 | 13 |
| 25  | + | 1819 | TGATATGGAAGGTAGCCTGCT    | 21 | 13 |
| 19  | + | 1820 | GATATGGAAGGTAGCCTGCTC    | 21 | 14 |
| 29  | + | 1821 | ATATGGAAGGTAGCCTGCTCGA   | 22 | 15 |
| 4   | + | 1821 | ATATGGAAGGTAGCCTGCTCGAGA | 24 | 15 |
| 59  | + | 1821 | ATATGGAAGGTAGCCTGCTCG    | 21 | 15 |
| 154 | + | 1822 | TATGGAAGGTAGCCTGCTCGA    | 21 | 16 |
| 1   | + | 1822 | TATGGAAGGTAGCCTGCTCGAGAA | 24 | 16 |
| 72  | + | 1822 | TATGGAAGGTAGCCTGCTCGAG   | 22 | 16 |
| 9   | + | 1822 | TATGGAAGGTAGCCTGCTCGAGA  | 23 | 16 |
| 26  | + | 1823 | ATGGAAGGTAGCCTGCTCGAGA   | 22 | 17 |
| 533 | + | 1823 | ATGGAAGGTAGCCTGCTCGAG    | 21 | 17 |
| 176 | + | 1824 | TGGAAGGTAGCCTGCTCGAGA    | 21 | 18 |
| 1   | + | 1824 | TGGAAGGTAGCCTGCTCGAG     | 20 | 18 |
| 24  | + | 1824 | TGGAAGGTAGCCTGCTCGAGAA   | 22 | 18 |
| 6   | + | 1826 | GAAGGTAGCCTGCTCGAGAAG    | 21 | 20 |
| 10  | + | 1832 | AGCCTGCTCGAGAAGCTATGG    | 21 | 5  |
| 15  | + | 1832 | AGCCTGCTCGAGAAGCTATGGG   | 22 | 5  |
| 116 | + | 1833 | GCCTGCTCGAGAAGCTATGGG    | 21 | 6  |
| 1   | + | 1833 | GCCTGCTCGAGAAGCTATGGGA   | 22 | 6  |
| 9   | + | 1835 | CTGCTCGAGAAGCTATGGGAT    | 21 | 8  |
| 4   | + | 1838 | CTCGAGAAGCTATGGGATGG     | 20 | 11 |
| 81  | + | 1838 | CTCGAGAAGCTATGGGATGGA    | 21 | 11 |
| 170 | + | 1839 | TCGAGAAGCTATGGGATGGAA    | 21 | 12 |

|     |   |      |                             |    |    |
|-----|---|------|-----------------------------|----|----|
| 37  | + | 1839 | TCGAGAAGCTATGGGATGGAAC      | 22 | 12 |
| 37  | + | 1840 | CGAGAAGCTATGGGATGGAAC       | 21 | 13 |
| 9   | + | 1841 | GAGAAGCTATGGGATGGAAC        | 21 | 14 |
| 12  | + | 1842 | AGAAGCTATGGGATGGAAC         | 21 | 15 |
| 162 | + | 1844 | AAGCTATGGGATGGAAC           | 21 | 17 |
| 4   | + | 1863 | AGCCCCTTGCAAATCTCAAGA       | 21 | 15 |
| 11  | + | 1864 | GCCCCTTGCAAATCTCAAGA        | 20 | 16 |
| 2   | + | 1864 | GCCCCTTGCAAATCTCAAGAA       | 21 | 16 |
| 3   | + | 1865 | CCCCTTGCAAATCTCAAGAAG       | 21 | 17 |
| 10  | + | 1866 | CCCTTGCAAATCTCAAGAAGA       | 21 | 18 |
| 4   | + | 1867 | CCTTGCAAATCTCAAGAAGATG      | 22 | 19 |
| 8   | + | 1868 | CTTGCAAATCTCAAGAAGATG       | 21 | 20 |
| 14  | + | 1870 | TGCAAATCTCAAGAAGATGTC       | 21 | 1  |
| 32  | + | 1876 | TCTCAAGAAGATGTCTTTGTC       | 21 | 7  |
| 14  | + | 1880 | AAGAAGATGTCTTTGTCAAGT       | 21 | 11 |
| 7   | + | 1880 | AAGAAGATGTCTTTGTCAAGTT      | 22 | 11 |
| 134 | + | 1881 | AGAAGATGTCTTTGTCAAGTT       | 21 | 12 |
| 1   | + | 1883 | AAGATGTCTTTGTCAAGTTCA       | 21 | 14 |
| 29  | + | 1886 | ATGTCTTTGTCAAGTTCATGG       | 21 | 17 |
| 221 | + | 1887 | TGTCTTTGTCAAGTTCATGGT       | 21 | 18 |
| 117 | + | 1888 | GTCTTTGTCAAGTTCATGGTA       | 21 | 19 |
| 1   | + | 1888 | GTCTTTGTCAAGTTCATGGT        | 20 | 19 |
| 15  | + | 1889 | TCTTTGTCAAGTTCATGGTAT       | 21 | 20 |
| 61  | + | 1889 | TCTTTGTCAAGTTCATGGTATT      | 22 | 20 |
| 28  | + | 1891 | TTTGTCAAGTTCATGGTATTT       | 21 | 1  |
| 52  | + | 1891 | TTTGTCAAGTTCATGGTATTTA      | 22 | 1  |
| 59  | + | 1891 | TTTGTCAAGTTCATGGTAT         | 19 | 1  |
| 3   | + | 1895 | TCAAGTTCATGGTATTTAAAG       | 21 | 5  |
| 108 | + | 1897 | AAGTTCATGGTATTTAAAGAA       | 21 | 7  |
| 22  | + | 1897 | AAGTTCATGGTATTTAAAGA        | 20 | 7  |
| 2   | + | 1899 | GTCATGGTATTTAAAGAAAC        | 21 | 9  |
| 17  | + | 1900 | TTCATGGTATTTAAAGAAACT       | 21 | 10 |
| 1   | + | 1901 | TCATGGTATTTAAAGAAACT        | 20 | 11 |
| 7   | + | 1903 | ATGGTATTTAAAGAAACTTCC       | 21 | 13 |
| 9   | + | 1904 | TGGTATTTAAAGAAACTTCCGG      | 22 | 14 |
| 1   | + | 1905 | GGTATTTAAAGAAACTTCCGGATCTGT | 27 | 15 |
| 111 | + | 1907 | TATTTAAAGAAACTTCCGGAT       | 21 | 17 |
| 2   | + | 1907 | TATTTAAAGAAACTTCCGGATC      | 22 | 17 |
| 101 | + | 1908 | ATTTAAAGAAACTTCCGGATC       | 21 | 18 |
| 11  | + | 1910 | TTAAAGAAACTTCCGGATCTG       | 21 | 20 |
| 15  | + | 1911 | TAAAGAAACTTCCGGATCTGT       | 21 | 0  |
| 119 | + | 1912 | AAAGAAACTTCCGGATCTGTC       | 21 | 1  |
| 4   | + | 1913 | AAGAAACTTCCGGATCTGTCA       | 21 | 2  |
| 9   | + | 1913 | AAGAAACTTCCGGATCTGTC        | 20 | 2  |

|     |   |      |                            |    |    |
|-----|---|------|----------------------------|----|----|
| 19  | + | 1914 | AGAACTTCCGGATCTGTCAA       | 21 | 3  |
| 12  | + | 1915 | GAACTTCCGGATCTGTCAAA       | 21 | 4  |
| 126 | + | 1916 | AACTTCCGGATCTGTCAAAT       | 21 | 5  |
| 4   | + | 1916 | AACTTCCGGATCTGTCAAATG      | 22 | 5  |
| 39  | + | 1917 | AACTTCCGGATCTGTCAAATG      | 21 | 6  |
| 63  | + | 1918 | ACTTCCGGATCTGTCAAATGC      | 21 | 7  |
| 40  | + | 1919 | CTTCCGGATCTGTCAAATGCT      | 21 | 8  |
| 11  | + | 1920 | TTCCGGATCTGTCAAATGCTA      | 21 | 9  |
| 51  | + | 1921 | TCCGGATCTGTCAAATGCTACA     | 22 | 10 |
| 5   | + | 1921 | TCCGGATCTGTCAAATGCTAC      | 21 | 10 |
| 8   | + | 1922 | CCGGATCTGTCAAATGCTACAAATC  | 25 | 11 |
| 28  | + | 1923 | CGGATCTGTCAAATGCTACAA      | 21 | 12 |
| 4   | + | 1923 | CGGATCTGTCAAATGCTACAAA     | 22 | 12 |
| 13  | + | 1926 | ATCTGTCAAATGCTACAAATC      | 21 | 15 |
| 10  | + | 1928 | CTGTCAAATGCTACAAATCTC      | 21 | 17 |
| 4   | + | 1929 | TGTCAAATGCTACAAATCTCGAAGAA | 26 | 18 |
| 4   | + | 1929 | TGTCAAATGCTACAAATCTCG      | 21 | 18 |
| 7   | + | 1930 | GTCAAATGCTACAAATCTCGA      | 21 | 19 |
| 22  | + | 1931 | TCAAATGCTACAAATCTCGAAG     | 22 | 20 |
| 33  | + | 1931 | TCAAATGCTACAAATCTCGAA      | 21 | 20 |
| 23  | + | 1933 | AAATGCTACAAATCTCGAAGAA     | 22 | 1  |
| 70  | + | 1933 | AAATGCTACAAATCTCGAAGA      | 21 | 1  |
| 64  | + | 1934 | AATGCTACAAATCTCGAAGAA      | 21 | 2  |
| 27  | + | 1935 | ATGCTACAAATCTCGAAGAAT      | 21 | 3  |
| 6   | + | 1936 | TGCTACAAATCTCGAAGAATTGGAT  | 25 | 4  |
| 77  | + | 1938 | CTACAAATCTCGAAGAATTGGA     | 22 | 6  |
| 408 | + | 1939 | TACAAATCTCGAAGAATTGGA      | 21 | 7  |
| 6   | + | 1943 | AATCTCGAAGAATTGGATCTG      | 21 | 11 |
| 61  | + | 1944 | ATCTCGAAGAATTGGATCTGA      | 21 | 12 |
| 1   | + | 1945 | TCTCGAAGAATTGGATC          | 17 | 13 |
| 6   | + | 1947 | TCGAAGAATTGGATCTGAGAG      | 21 | 15 |
| 3   | + | 1949 | GAAGAATTGGATCTGAGAGCTT     | 22 | 17 |
| 5   | + | 1949 | GAAGAATTGGATCTGAGAGCT      | 21 | 17 |
| 2   | + | 1950 | AAGAATTGGATCTGAGAG         | 18 | 18 |
| 54  | + | 1950 | AAGAATTGGATCTGAGAGCTTG     | 22 | 18 |
| 59  | + | 1950 | AAGAATTGGATCTGAGAGCTT      | 21 | 18 |
| 5   | + | 1951 | AGAATTGGATCTGAGAGCTTG      | 21 | 19 |
| 1   | + | 1952 | GAATTGGATCTGAGAGCTTGCC     | 22 | 20 |
| 2   | + | 1952 | GAATTGGATCTGAGAGCTTGC      | 21 | 20 |
| 1   | + | 1953 | AATTGGATCTGAGAGCTTGCCA     | 22 | 0  |
| 230 | + | 1953 | AATTGGATCTGAGAGCTTGCC      | 21 | 0  |
| 27  | + | 1954 | ATTGGATCTGAGAGCTTGCCA      | 21 | 1  |
| 2   | + | 1954 | ATTGGATCTGAGAGCTTGCC       | 20 | 1  |
| 5   | + | 1954 | ATTGGATCTGAGAGCTTGC        | 19 | 1  |

|     |   |      |                          |    |    |
|-----|---|------|--------------------------|----|----|
| 140 | + | 1955 | TTGGATCTGAGAGCTTGCCAGA   | 22 | 2  |
| 15  | + | 1955 | TTGGATCTGAGAGCTTGC       | 18 | 2  |
| 332 | + | 1955 | TTGGATCTGAGAGCTTGCCAG    | 21 | 2  |
| 270 | + | 1956 | TGGATCTGAGAGCTTGCCAGA    | 21 | 3  |
| 1   | + | 1957 | GGATCTGAGAGCTTGCCAGA     | 20 | 4  |
| 2   | + | 1957 | GGATCTGAGAGCTTGCCAG      | 19 | 4  |
| 4   | + | 1957 | GGATCTGAGAGCTTGCCAGAA    | 21 | 4  |
| 2   | + | 1962 | TGAGAGCTTGCCAGAATTTAGT   | 22 | 9  |
| 6   | + | 1964 | AGAGCTTGCCAGAATTTAGTA    | 21 | 11 |
| 31  | + | 1966 | AGCTTGCCAGAATTTAGTAGA    | 21 | 13 |
| 25  | + | 1967 | GCTTGCCAGAATTTAGTAGAG    | 21 | 14 |
| 6   | + | 1968 | CTTGCCAGAATTTAGTAGAGC    | 21 | 15 |
| 11  | + | 1969 | TTGCCAGAATTTAGTAGAGCTT   | 22 | 16 |
| 1   | + | 1969 | TTGCCAGAATTTAGTAGAGCTTCC | 24 | 16 |
| 44  | + | 1969 | TTGCCAGAATTTAGTAGAGCT    | 21 | 16 |
| 196 | + | 1970 | TGCCAGAATTTAGTAGAGCTT    | 21 | 17 |
| 1   | + | 1971 | GCCAGAATTTAGTAGAGCTT     | 20 | 18 |
| 4   | + | 1973 | CAGAATTTAGTAGAGCTTCCTT   | 22 | 20 |
| 8   | + | 1973 | CAGAATTTAGTAGAGCTTCCT    | 21 | 20 |
| 158 | + | 1974 | AGAATTTAGTAGAGCTTCCTT    | 21 | 0  |
| 4   | + | 1974 | AGAATTTAGTAGAGCTTCCTTC   | 22 | 0  |
| 20  | + | 1976 | AATTTAGTAGAGCTTCCTTCC    | 21 | 2  |
| 11  | + | 1977 | ATTTAGTAGAGCTTCCTTCCT    | 21 | 3  |
| 16  | + | 1978 | TTTAGTAGAGCTTCCTTCCTC    | 21 | 4  |
| 7   | + | 1979 | TTAGTAGAGCTTCCTTCCTCC    | 21 | 5  |
| 120 | + | 1980 | TAGTAGAGCTTCCTTCCTCCT    | 21 | 6  |
| 22  | + | 1989 | TTCCTTCCTTCCTTTTCTTATC   | 21 | 15 |
| 6   | + | 1993 | TTCCTTCCTTTTCTTATCTGCA   | 21 | 19 |
| 14  | + | 2006 | TATCTGCATAAGCTAAAGTAT    | 21 | 11 |
| 5   | + | 2017 | GCTAAAGTATTTGAATATGAT    | 21 | 1  |
| 2   | + | 2018 | CTAAAGTATTTGAATATGATGG   | 22 | 2  |
| 198 | + | 2019 | TAAAGTATTTGAATATGATGG    | 21 | 3  |
| 27  | + | 2020 | AAAGTATTTGAATATGATGGG    | 21 | 4  |
| 267 | + | 2021 | AAGTATTTGAATATGATGGGA    | 21 | 5  |
| 13  | + | 2022 | AGTATTTGAATATGATGGGAT    | 21 | 6  |
| 1   | + | 2022 | AGTATTTGAATATGATGGGA     | 20 | 6  |
| 11  | + | 2024 | TATTTGAATATGATGGGATGCA   | 22 | 8  |
| 8   | + | 2024 | TATTTGAATATGATGGGATGC    | 21 | 8  |
| 25  | + | 2025 | ATTTGAATATGATGGGATGCA    | 21 | 9  |
| 161 | + | 2026 | TTTGAATATGATGGGATGCAGA   | 22 | 10 |
| 21  | + | 2026 | TTTGAATATGATGGGATGCAG    | 21 | 10 |
| 235 | + | 2027 | TTGAATATGATGGGATGCAGA    | 21 | 11 |
| 1   | + | 2028 | TGAATATGATGGGATGCAGA     | 20 | 12 |
| 3   | + | 2028 | TGAATATGATGGGATGCAGAA    | 21 | 12 |

|     |   |      |                          |    |    |
|-----|---|------|--------------------------|----|----|
| 53  | + | 2030 | AATATGATGGGATGCAGAAGG    | 21 | 14 |
| 103 | + | 2031 | ATATGATGGGATGCAGAAGGC    | 21 | 15 |
| 12  | + | 2037 | TGGGATGCAGAAGGCTAAAAG    | 21 | 0  |
| 36  | + | 2037 | TGGGATGCAGAAGGCTAAAAGA   | 22 | 0  |
| 16  | + | 2039 | GGATGCAGAAGGCTAAAAGAA    | 21 | 2  |
| 10  | + | 2040 | GATGCAGAAGGCTAAAAGAAG    | 21 | 3  |
| 12  | + | 2041 | ATGCAGAAGGCTAAAAGAAGTT   | 22 | 4  |
| 69  | + | 2041 | ATGCAGAAGGCTAAAAGAAGT    | 21 | 4  |
| 2   | + | 2042 | TGCAGAAGGCTAAAAGAAGTTC   | 22 | 5  |
| 40  | + | 2042 | TGCAGAAGGCTAAAAGAAGTT    | 21 | 5  |
| 1   | + | 2043 | GCAGAAGGCTAAAAGAAGTTC    | 21 | 6  |
| 18  | + | 2048 | AGGCTAAAAGAAGTTCCACCT    | 21 | 11 |
| 1   | + | 2054 | AAAGAAGTTCCACCTCATATCA   | 22 | 17 |
| 34  | + | 2054 | AAAGAAGTTCCACCTCATATC    | 21 | 17 |
| 12  | + | 2059 | AGTTCCACCTCATATCAACTT    | 21 | 1  |
| 7   | + | 2061 | TTCCACCTCATATCAACTTGA    | 21 | 3  |
| 2   | + | 2062 | TCCACCTCATATCAACTTGAA    | 21 | 4  |
| 1   | + | 2067 | CTCATATCAACTTGAAGTCTCT   | 22 | 9  |
| 6   | + | 2067 | CTCATATCAACTTGAAGTCTC    | 21 | 9  |
| 2   | + | 2069 | CATATCAACTTGAAGTCTCT     | 20 | 11 |
| 10  | + | 2070 | ATATCAACTTGAAGTCTCTTG    | 21 | 12 |
| 1   | + | 2070 | ATATCAACTTGAAGTCTCTTGA   | 22 | 12 |
| 16  | + | 2071 | TATCAACTTGAAGTCTCTTGA    | 21 | 13 |
| 19  | + | 2073 | TCAACTTGAAGTCTCTTGAATT   | 22 | 15 |
| 6   | + | 2073 | TCAACTTGAAGTCTCTTGAAT    | 21 | 15 |
| 15  | + | 2076 | ACTTGAAGTCTCTTGAATTGG    | 21 | 18 |
| 14  | + | 2077 | CTTGAAGTCTCTTGAATTGGT    | 21 | 19 |
| 2   | + | 2077 | CTTGAAGTCTCTTGAATTGGTC   | 22 | 19 |
| 1   | + | 2078 | TTGAAGTCTCTTGAATTGGT     | 20 | 20 |
| 48  | + | 2078 | TTGAAGTCTCTTGAATTGGTC    | 21 | 20 |
| 4   | + | 2079 | TGAAGTCTCTTGAATTGGTCA    | 21 | 0  |
| 4   | + | 2080 | GAAGTCTCTTGAATTGGTCA     | 20 | 1  |
| 12  | + | 2081 | AAGTCTCTTGAATTGGTCAACA   | 22 | 2  |
| 4   | + | 2086 | TCTTGAATTGGTCAACATGTA    | 21 | 7  |
| 1   | + | 2087 | CTTGAATTGGTCAACATGTATGG  | 23 | 8  |
| 9   | + | 2088 | TTGAATTGGTCAACATGTATGG   | 22 | 9  |
| 11  | + | 2089 | TGAATTGGTCAACATGTATGG    | 21 | 10 |
| 51  | + | 2089 | TGAATTGGTCAACATGTATGGA   | 22 | 10 |
| 100 | + | 2090 | GAATTGGTCAACATGTATGGA    | 21 | 11 |
| 7   | + | 2090 | GAATTGGTCAACATGTATGG     | 20 | 11 |
| 9   | + | 2090 | GAATTGGTCAACATGTATGGATGC | 24 | 11 |
| 37  | + | 2091 | AATTGGTCAACATGTATGGATG   | 22 | 12 |
| 149 | + | 2092 | ATTGGTCAACATGTATGGATG    | 21 | 13 |
| 15  | + | 2092 | ATTGGTCAACATGTATGGA      | 19 | 13 |

|     |   |      |                             |    |    |
|-----|---|------|-----------------------------|----|----|
| 3   | + | 2092 | ATTGGTCAACATGTATGGATGC      | 22 | 13 |
| 101 | + | 2093 | TTGGTCAACATGTATGGATGC       | 21 | 14 |
| 24  | + | 2094 | TGGTCAACATGTATGGATGCT       | 21 | 15 |
| 45  | + | 2099 | AACATGTATGGATGCTCAAGA       | 21 | 20 |
| 16  | + | 2100 | ACATGTATGGATGCTCAAGAT       | 21 | 0  |
| 4   | + | 2100 | ACATGTATGGATGCTCAAGATT      | 22 | 0  |
| 12  | + | 2103 | TGTATGGATGCTCAAGATTAA       | 21 | 3  |
| 1   | + | 2103 | TGTATGGATGCTCAAGATTA AAAAAG | 25 | 3  |
| 3   | + | 2103 | TGTATGGATGCTCAAGATTA AAAA   | 24 | 3  |
| 4   | + | 2103 | TGTATGGATGCTCAAGATTA AAAA   | 23 | 3  |
| 5   | + | 2106 | ATGGATGCTCAAGATTA AAAAAG    | 22 | 6  |
| 38  | + | 2107 | TGGATGCTCAAGATTA AAAAAG     | 21 | 7  |
| 8   | + | 2107 | TGGATGCTCAAGATTA AAAAAGC    | 22 | 7  |
| 5   | + | 2109 | GATGCTCAAGATTA AAAAAGCT     | 21 | 9  |
| 1   | + | 2111 | TGCTCAAGATTA AAAAAGCTTT     | 21 | 11 |
| 1   | + | 2116 | AAGATTA AAAAAGCTTTCCAGA     | 21 | 16 |
| 7   | + | 2119 | ATTA AAAAAGCTTTCCAGATAT     | 21 | 19 |
| 5   | + | 2122 | AAAAAGCTTTCCAGATATTT        | 20 | 1  |
| 7   | + | 2129 | TTTCCAGATATTTCTACAAAC       | 21 | 8  |
| 2   | + | 2133 | CAGATATTTCTACAAACATCAGT     | 23 | 12 |
| 17  | + | 2136 | ATATTTCTACAAACATCAGTT       | 21 | 15 |
| 2   | + | 2139 | TTTCTACAAACATCAGTTCAC       | 21 | 18 |
| 2   | + | 2143 | TACAAACATCAGTTCACTCGAC      | 22 | 1  |
| 38  | + | 2143 | TACAAACATCAGTTCACTCGA       | 21 | 1  |
| 9   | + | 2144 | ACAAACATCAGTTCACTCGAC       | 21 | 2  |
| 20  | + | 2147 | AACATCAGTTCACTCGACATAT      | 22 | 5  |
| 3   | + | 2148 | ACATCAGTTCACTCGACATAT       | 21 | 6  |
| 21  | + | 2151 | TCAGTTCACTCGACATATCATA      | 22 | 9  |
| 6   | + | 2154 | GTTCACTCGACATATCATACA       | 21 | 12 |
| 4   | + | 2155 | TTCACTCGACATATCATACACTG     | 23 | 13 |
| 6   | + | 2155 | TTCACTCGACATATCATACACT      | 22 | 13 |
| 86  | + | 2159 | CTCGACATATCATACACTGATG      | 22 | 17 |
| 12  | + | 2174 | ACTGATGTGGAAGAACTACCT       | 21 | 11 |
| 6   | + | 2175 | CTGATGTGGAAGAACTACCTG       | 21 | 12 |
| 84  | + | 2175 | CTGATGTGGAAGAACTACCTGA      | 22 | 12 |
| 23  | + | 2176 | TGATGTGGAAGAACTACCTGA       | 21 | 13 |
| 4   | + | 2176 | TGATGTGGAAGAACTACCTGAA      | 22 | 13 |
| 16  | + | 2177 | GATGTGGAAGAACTACCTGAA       | 21 | 14 |
| 9   | + | 2178 | ATGTGGAAGAACTACCTGAAT       | 21 | 15 |
| 6   | + | 2179 | TGTGGAAGAACTACCTGAATC       | 21 | 16 |
| 34  | + | 2181 | TGGAAGAACTACCTGAATCAAT      | 22 | 18 |
| 77  | + | 2184 | AAGAACTACCTGAATCAATGA       | 21 | 0  |
| 4   | + | 2185 | AGAACTACCTGAATCAATGAC       | 21 | 1  |
| 1   | + | 2188 | ACTACCTGAATCAATGACGAT       | 21 | 4  |



|     |   |      |                         |    |    |
|-----|---|------|-------------------------|----|----|
| 11  | + | 2190 | TACCTGAATCAATGACGATGT   | 21 | 6  |
| 2   | + | 2192 | CCTGAATCAATGACGATGTGG   | 21 | 8  |
| 18  | + | 2193 | CTGAATCAATGACGATGTGGT   | 21 | 9  |
| 24  | + | 2198 | TCAATGACGATGTGGTCTCGC   | 21 | 14 |
| 48  | + | 2198 | TCAATGACGATGTGGTCTCGCC  | 22 | 14 |
| 2   | + | 2199 | CAATGACGATGTGGTCTCGCC   | 21 | 15 |
| 11  | + | 2202 | TGACGATGTGGTCTCGCCTACG  | 22 | 18 |
| 2   | + | 2205 | CGATGTGGTCTCGCCTACGTA   | 21 | 0  |
| 6   | + | 2205 | CGATGTGGTCTCGCCTACGTAC  | 22 | 0  |
| 21  | + | 2210 | TGGTCTCGCCTACGTACTCTCG  | 22 | 5  |
| 8   | + | 2237 | TACAAAAGTAGAAACCTCAAG   | 21 | 11 |
| 2   | + | 2241 | AAAGTAGAAACCTCAAGATAG   | 21 | 15 |
| 3   | + | 2241 | AAAGTAGAAACCTCAAGATAGT  | 22 | 15 |
| 8   | + | 2242 | AAGTAGAAACCTCAAGATAGT   | 21 | 16 |
| 6   | + | 2245 | TAGAAACCTCAAGATAGTAAC   | 21 | 19 |
| 6   | + | 2248 | AAACCTCAAGATAGTAACACA   | 21 | 1  |
| 14  | + | 2253 | TCAAGATAGTAACACATGTGC   | 21 | 6  |
| 19  | + | 2254 | CAAGATAGTAACACATGTGCC   | 21 | 7  |
| 5   | + | 2258 | ATAGTAACACATGTGCCCTA    | 21 | 11 |
| 6   | + | 2274 | CCCTAAACCTAACATATCTAGA  | 22 | 6  |
| 2   | + | 2277 | TAAACCTAACATATCTAGACC   | 21 | 9  |
| 13  | + | 2281 | CCTAACATATCTAGACCTCAG   | 21 | 13 |
| 19  | + | 2282 | CTAACATATCTAGACCTCAGCG  | 22 | 14 |
| 17  | + | 2283 | TAACATATCTAGACCTCAGCGA  | 22 | 15 |
| 21  | + | 2283 | TAACATATCTAGACCTCAGCG   | 21 | 15 |
| 2   | + | 2284 | AACATATCTAGACCTCAGCGA   | 21 | 16 |
| 7   | + | 2285 | ACATATCTAGACCTCAGCGAG   | 21 | 17 |
| 7   | + | 2287 | ATATCTAGACCTCAGCGAGAC   | 21 | 19 |
| 24  | + | 2292 | TAGACCTCAGCGAGACTAGAA   | 21 | 3  |
| 18  | + | 2297 | CTCAGCGAGACTAGAATTGAG   | 21 | 8  |
| 23  | + | 2297 | CTCAGCGAGACTAGAATTGAGA  | 22 | 8  |
| 56  | + | 2297 | CTCAGCGAGACTAGAATTGAGAA | 23 | 8  |
| 1   | + | 2298 | TCAGCGAGACTAGAATTGAGAA  | 22 | 9  |
| 283 | + | 2298 | TCAGCGAGACTAGAATTGAGA   | 21 | 9  |
| 27  | + | 2299 | CAGCGAGACTAGAATTGAGAA   | 21 | 10 |
| 60  | + | 2301 | GCGAGACTAGAATTGAGAAGA   | 21 | 12 |
| 14  | + | 2302 | CGAGACTAGAATTGAGAAGAT   | 21 | 13 |
| 13  | + | 2311 | AATTGAGAAGATTCCAGATGA   | 21 | 1  |
| 4   | + | 2311 | AATTGAGAAGATTCCAGATGAC  | 22 | 1  |
| 3   | + | 2312 | ATTGAGAAGATTCCAGATGA    | 20 | 2  |
| 7   | + | 2312 | ATTGAGAAGATTCCAGATGAC   | 21 | 2  |
| 28  | + | 2333 | ATCAAAAATGTTTCATGGGCTG  | 21 | 2  |
| 31  | + | 2334 | TCAAAAATGTTTCATGGGCTGC  | 21 | 3  |
| 61  | + | 2334 | TCAAAAATGTTTCATGGGCTGCA | 22 | 3  |

|     |   |      |                         |    |    |
|-----|---|------|-------------------------|----|----|
| 2   | + | 2336 | AAAAATGTTTCATGGGCTGCAAA | 22 | 5  |
| 8   | + | 2336 | AAAAATGTTTCATGGGCTGCAA  | 21 | 5  |
| 9   | + | 2337 | AAAATGTTTCATGGGCTGCAAA  | 21 | 6  |
| 35  | + | 2338 | AAATGTTTCATGGGCTGCAAAT  | 21 | 7  |
| 13  | + | 2339 | AATGTTTCATGGGCTGCAAATT  | 21 | 8  |
| 5   | + | 2341 | TGTTTCATGGGCTGCAAATTTT  | 21 | 10 |
| 17  | + | 2343 | TTCATGGGCTGCAAATTTTATT  | 22 | 12 |
| 18  | + | 2343 | TTCATGGGCTGCAAATTTTAT   | 21 | 12 |
| 12  | + | 2344 | TCATGGGCTGCAAATTTTATT   | 21 | 13 |
| 16  | + | 2346 | ATGGGCTGCAAATTTTATTTTC  | 21 | 15 |
| 11  | + | 2347 | TGGGCTGCAAATTTTATTTCT   | 21 | 16 |
| 8   | + | 2353 | GCAAATTTTATTTCTAGGTGG   | 21 | 1  |
| 7   | + | 2354 | CAAATTTTATTTCTAGGTGGC   | 21 | 2  |
| 11  | + | 2356 | AATTTTATTTCTAGGTGG      | 18 | 4  |
| 34  | + | 2356 | AATTTTATTTCTAGGTGGCTG   | 21 | 4  |
| 7   | + | 2356 | AATTTTATTTCTAGGTGGCTGC  | 22 | 4  |
| 23  | + | 2357 | ATTTTATTTCTAGGTGGCTGC   | 21 | 5  |
| 94  | + | 2360 | TTATTTCTAGGTGGCTGCAGA   | 21 | 8  |
| 13  | + | 2363 | TTTCTAGGTGGCTGCAGAAAA   | 21 | 11 |
| 34  | + | 2367 | TAGGTGGCTGCAGAAAACCTCGC | 22 | 15 |
| 102 | + | 2368 | AGGTGGCTGCAGAAAACCTCGC  | 21 | 16 |
| 1   | + | 2369 | GGTGGCTGCAGAAAACCTCGC   | 20 | 17 |
| 2   | + | 2370 | GTGGCTGCAGAAAACCTCGCAT  | 21 | 18 |
| 132 | + | 2371 | TGGCTGCAGAAAACCTCGCATC  | 21 | 19 |
| 6   | + | 2377 | CAGAAAACCTCGCATCATTGCC  | 21 | 4  |
| 20  | + | 2380 | AAAACCTCGCATCATTGCCAGA  | 21 | 7  |
| 7   | + | 2385 | TCGCATCATTGCCAGAGCTTC   | 21 | 12 |
| 27  | + | 2389 | ATCATTGCCAGAGCTTCTCTGG  | 21 | 16 |
| 20  | + | 2407 | TGGTTCGCTCTTGTACTTATC   | 21 | 13 |
| 9   | + | 2409 | GTTTCGCTCTTGTACTTATCAG  | 21 | 15 |
| 38  | + | 2410 | TTCGCTCTTGTACTTATCAGCA  | 22 | 16 |
| 5   | + | 2410 | TTCGCTCTTGTACTTATCAGC   | 21 | 16 |
| 84  | + | 2417 | TTGTACTTATCAGCAAACGAG   | 21 | 2  |
| 51  | + | 2427 | CAGCAAACGAGTGTGAATCAC   | 21 | 12 |
| 14  | + | 2438 | TGTGAATCACTTGAGAGCGTA   | 21 | 2  |
| 2   | + | 2442 | AATCACTTGAGAGCGTATCTT   | 21 | 6  |
| 10  | + | 2443 | ATCACTTGAGAGCGTATCTTG   | 21 | 7  |
| 3   | + | 2443 | ATCACTTGAGAGCGTATCTTGC  | 22 | 7  |
| 5   | + | 2447 | CTTGAGAGCGTATCTTGCCCT   | 21 | 11 |
| 13  | + | 2465 | CCTTTTAATACTTCATACATG   | 21 | 8  |
| 64  | + | 2467 | TTTTAATACTTCATACATGGA   | 21 | 10 |
| 2   | + | 2468 | TTTAATACTTCATACATGGAA   | 21 | 11 |
| 9   | + | 2470 | TAATACTTCATACATGGAACT   | 21 | 13 |
| 5   | + | 2471 | AATACTTCATACATGGAACTC   | 21 | 14 |

|    |   |      |                            |    |    |
|----|---|------|----------------------------|----|----|
| 3  | + | 2472 | ATACTTCATACATGGAACTCAGC    | 23 | 15 |
| 11 | + | 2473 | TACTTCATACATGGAACTCAG      | 21 | 16 |
| 10 | + | 2474 | ACTTCATACATGGAACTCAGC      | 21 | 17 |
| 93 | + | 2475 | CTTCATACATGGAACTCAGCT      | 21 | 18 |
| 4  | + | 2476 | TTCATACATGGAACTCAGCTTC     | 22 | 19 |
| 58 | + | 2476 | TTCATACATGGAACTCAGCTT      | 21 | 19 |
| 6  | + | 2479 | ATACATGGAACTCAGCTTCACC     | 22 | 1  |
| 39 | + | 2481 | ACATGGAACTCAGCTTCACCAA     | 22 | 3  |
| 9  | + | 2483 | ATGGAACTCAGCTTCACCAAC      | 21 | 5  |
| 4  | + | 2485 | GGAACTCAGCTTCACCAACTG      | 21 | 7  |
| 12 | + | 2486 | GAACTCAGCTTCACCAACTGC      | 21 | 8  |
| 13 | + | 2488 | ACTCAGCTTCACCAACTGCTT      | 21 | 10 |
| 1  | + | 2495 | TTCACCAACTGCTTCAAATA       | 21 | 17 |
| 30 | + | 2508 | TCAAATAAACCAAGAAGCACGCAGAG | 27 | 9  |
| 1  | + | 2511 | AACTAAACCAAGAAGCACGCAG     | 22 | 12 |
| 5  | + | 2511 | AACTAAACCAAGAAGCACGCA      | 21 | 12 |
| 2  | + | 2512 | ACTAAACCAAGAAGCACGCAGA     | 22 | 13 |
| 4  | + | 2513 | CTAAACCAAGAAGCACGCAGAG     | 22 | 14 |
| 4  | + | 2514 | TAAACCAAGAAGCACGCAGAG      | 21 | 15 |
| 29 | + | 2517 | ACCAAGAAGCACGCAGAGGAA      | 21 | 18 |
| 55 | + | 2527 | ACGCAGAGGAATTATTCAACA      | 21 | 7  |
| 5  | + | 2541 | TTCAACAATCATTTTCTCATGG     | 22 | 0  |
| 1  | + | 2546 | CAATCATTTTCTCATGGGTGG      | 21 | 5  |
| 4  | + | 2547 | AATCATTTTCTCATGGGTGGG      | 21 | 6  |
| 15 | + | 2551 | ATTTTCTCATGGGTGGGCATC      | 21 | 10 |
| 11 | + | 2552 | TTTTTCTCATGGGTGGGCATCCT    | 22 | 11 |
| 5  | + | 2557 | TCATGGGTGGGCATCCTTACC      | 21 | 16 |
| 4  | + | 2560 | TGGGTGGGCATCCTTACCTGGA     | 22 | 19 |
| 5  | + | 2563 | GTGGGCATCCTTACCTGGAA       | 20 | 1  |
| 31 | + | 2572 | CTTACCTGGAAGAGAGTTGCC      | 21 | 10 |
| 9  | + | 2573 | TTACCTGGAAGAGAGTTGCCC      | 21 | 11 |
| 24 | + | 2574 | TACCTGGAAGAGAGTTGCCCA      | 21 | 12 |
| 3  | + | 2575 | ACCTGGAAGAGAGTTGCCCAC      | 21 | 13 |
| 4  | + | 2576 | CCTGGAAGAGAGTTGCCC         | 18 | 14 |
| 1  | + | 2578 | TGGAAGAGAGTTGCCCACTGAC     | 22 | 16 |
| 9  | + | 2578 | TGGAAGAGAGTTGCCCACTGA      | 21 | 16 |
| 7  | + | 2581 | AAGAGAGTTGCCCACTGACTT      | 21 | 19 |
| 11 | + | 2595 | CTGACTTATAACCACCGATCTA     | 21 | 12 |
| 3  | + | 2595 | CTGACTTATAACCACCGATCTAC    | 22 | 12 |
| 53 | + | 2596 | TGACTTATAACCACCGATCTAC     | 21 | 13 |
| 4  | + | 2599 | CTTATAACCACCGATCTACCGG     | 21 | 16 |
| 27 | + | 2602 | ATACCACCGATCTACCGGACA      | 21 | 19 |
| 1  | + | 2607 | ACCGATCTACCGGACATTCCA      | 21 | 3  |
| 11 | + | 2611 | ATCTACCGGACATTCCATCAC      | 21 | 7  |

|    |   |      |                          |    |    |
|----|---|------|--------------------------|----|----|
| 44 | + | 2611 | ATCTACCGGACATTCCATCA     | 20 | 7  |
| 34 | + | 2612 | TCTACCGGACATTCCATCACC    | 21 | 8  |
| 28 | + | 2614 | TACCGGACATTCCATCACCGTT   | 22 | 10 |
| 5  | + | 2615 | ACCGGACATTCCATCACCGTT    | 21 | 11 |
| 4  | + | 2618 | GGACATTCCATCACCGTTCGTC   | 22 | 14 |
| 5  | + | 2623 | TTCCATCACCGTTCGTCTCGAG   | 22 | 19 |
| 90 | + | 2623 | TTCCATCACCGTTCGTCTCGA    | 21 | 19 |
| 25 | + | 2624 | TCCATCACCGTTCGTCTCGAG    | 21 | 20 |
| 5  | + | 2625 | CCATCACCGTTCGTCTCGAGGGC  | 23 | 0  |
| 1  | + | 2626 | CATCACCGTTCGTCTCGAGGGC   | 22 | 1  |
| 6  | + | 2626 | CATCACCGTTCGTCTCGAGGG    | 21 | 1  |
| 1  | + | 2627 | ATCACCGTTCGTCTCGAGGGCAA  | 23 | 2  |
| 38 | + | 2627 | ATCACCGTTCGTCTCGAGGGC    | 21 | 2  |
| 5  | + | 2627 | ATCACCGTTCGTCTCGAGGGCA   | 22 | 2  |
| 5  | + | 2628 | TCACCGTTCGTCTCGAGGGCA    | 21 | 3  |
| 4  | + | 2630 | ACCGTTCGTCTCGAGGGCAAGA   | 22 | 5  |
| 5  | + | 2632 | CGTTCGTCTCGAGGGCAAGAC    | 21 | 7  |
| 4  | + | 2634 | TTCGTCTCGAGGGCAAGACTC    | 21 | 9  |
| 9  | + | 2638 | TCTCGAGGGCAAGACTCCTTT    | 21 | 13 |
| 37 | + | 2647 | CAAGACTCCTTTTTCTGCATT    | 21 | 1  |
| 52 | + | 2649 | AGACTCCTTTTTCTGCATTCT    | 21 | 3  |
| 1  | + | 2652 | CTCCTTTTTCTGCATTCTTTGG   | 22 | 6  |
| 15 | + | 2653 | TCCTTTTTCTGCATTCTTTGG    | 21 | 7  |
| 9  | + | 2656 | TTTTTCTGCATTCTTTGGATT    | 21 | 10 |
| 46 | + | 2658 | TTTCTGCATTCTTTGGATTTAAGG | 24 | 12 |
| 9  | + | 2658 | TTTCTGCATTCTTTGGATTTA    | 21 | 12 |
| 5  | + | 2660 | TCTGCATTCTTTGGATTTAAG    | 21 | 14 |
| 19 | + | 2662 | TGCATTCTTTGGATTTAAGGT    | 21 | 16 |
| 5  | + | 2662 | TGCATTCTTTGGATTTAAGGTT   | 22 | 16 |
| 1  | + | 2663 | GCATTCTTTGGATTTAAGGTT    | 21 | 17 |
| 22 | + | 2675 | TTTAAGGTTTTCCTCGTGATT    | 21 | 8  |
| 43 | + | 2682 | TTTTCCTCGTGATTTCCCCTAA   | 22 | 15 |
| 6  | + | 2682 | TTTTCCTCGTGATTTCCCCTA    | 21 | 15 |
| 11 | + | 2684 | TTCCTCGTGATTTCCCCTAAC    | 21 | 17 |
| 2  | + | 2686 | CCTCGTGATTTCCCCTAACCA    | 21 | 19 |
| 35 | + | 2689 | CGTGATTTCCCCTAACCATGA    | 21 | 1  |
| 6  | + | 2691 | TGATTTCCCCTAACCATGATGC   | 22 | 3  |
| 15 | + | 2694 | TTTCCCCTAACCATGATGCTG    | 21 | 6  |
| 41 | + | 2702 | AACCATGATGCTGAAGAACT     | 21 | 14 |
| 3  | + | 2703 | ACCATGATGCTGAAGAACTA     | 21 | 15 |
| 17 | + | 2704 | CCATGATGCTGAAGAACTAG     | 21 | 16 |
| 4  | + | 2726 | AATTCTCCCTTATTTGTCCT     | 21 | 17 |
| 11 | + | 2730 | CTCCCTTATTTGTCCTCGCA     | 21 | 0  |
| 5  | + | 2735 | TTATTTTGTCTCGCATTGGC     | 21 | 5  |

|    |   |      |                         |    |    |
|----|---|------|-------------------------|----|----|
| 3  | + | 2736 | TATTTTGCCTCGCATTGGCA    | 21 | 6  |
| 14 | + | 2743 | TCCTCGCATTGGCAAATCGG    | 21 | 13 |
| 18 | + | 2746 | TCGCATTGGCAAATCGGTTGC   | 22 | 16 |
| 20 | + | 2746 | TCGCATTGGCAAATCGGTTG    | 21 | 16 |
| 10 | + | 2747 | CGCATTGGCAAATCGGTTGC    | 21 | 17 |
| 3  | + | 2748 | GCATTGGCAAATCGGTTGCT    | 21 | 18 |
| 11 | + | 2764 | TTGCTCCGATGACGAAACACC   | 21 | 13 |
| 5  | + | 2779 | AACACCTATTTATATTATCCC   | 21 | 7  |
| 21 | + | 2790 | ATATTATCCCCAAACCTCGAG   | 21 | 18 |
| 6  | + | 2791 | TATTATCCCCAAACCTCGA     | 19 | 19 |
| 30 | + | 2793 | TTATCCCCAAACCTCGAGCAGA  | 22 | 0  |
| 5  | + | 2823 | TTATGTTTCACTCTGACTTGC   | 21 | 9  |
| 6  | + | 2826 | TGTTTCACTCTGACTTGCATA   | 21 | 12 |
| 2  | + | 2845 | TAACAAGGAAAAATGTCATGA   | 21 | 10 |
| 4  | + | 2847 | ACAAGGAAAAATGTCATGAAG   | 21 | 12 |
| 9  | + | 2847 | ACAAGGAAAAATGTCATGAAGT  | 22 | 12 |
| 6  | + | 2849 | AAGGAAAAATGTCATGAAGTAGG | 23 | 14 |
| 1  | + | 2852 | GAAAAATGTCATGAAGTAGGC   | 21 | 17 |
| 30 | + | 2854 | AAAATGTCATGAAGTAGGCAA   | 21 | 19 |
| 26 | + | 2855 | AAATGTCATGAAGTAGGCAAC   | 21 | 20 |
| 17 | + | 2859 | GTCATGAAGTAGGCAACGAGA   | 21 | 3  |
| 29 | + | 2860 | TCATGAAGTAGGCAACGAGAT   | 21 | 4  |
| 11 | + | 2862 | ATGAAGTAGGCAACGAGATACT  | 22 | 6  |
| 6  | + | 2863 | TGAAGTAGGCAACGAGATACTG  | 22 | 7  |
| 8  | + | 2869 | AGGCAACGAGATACTGTTTGA   | 21 | 13 |
| 10 | + | 2874 | ACGAGATACTGTTTGAATTCA   | 21 | 18 |
| 4  | + | 2875 | CGAGATACTGTTTGAATTCAG   | 21 | 19 |
| 10 | + | 2876 | GAGATACTGTTTGAATTCAGC   | 21 | 20 |
| 5  | + | 2901 | TATCCGACACCTATGAGATTA   | 21 | 3  |
| 1  | + | 2908 | CACCTATGAGATTATTGAGTG   | 21 | 10 |
| 10 | + | 2909 | ACCTATGAGATTATTGAGTGT   | 21 | 11 |
| 8  | + | 2910 | CCTATGAGATTATTGAGTGTGG  | 22 | 12 |
| 3  | + | 2912 | TATGAGATTATTGAGTGTGGT   | 21 | 14 |
| 8  | + | 2913 | ATGAGATTATTGAGTGTGGTGT  | 22 | 15 |
| 1  | + | 2914 | TGAGATTATTGAGTGTGGTGT   | 21 | 16 |
| 9  | + | 2914 | TGAGATTATTGAGTGTGGTGTC  | 22 | 16 |
| 24 | + | 2918 | ATTATTGAGTGTGGTGTGAGA   | 21 | 20 |
| 29 | + | 2929 | TGGTGTCAGATTCTATACAGA   | 21 | 10 |
| 5  | + | 2932 | TGTCAGATTCTATACAGATGA   | 21 | 13 |
| 3  | + | 2937 | GATTCTATACAGATGAACAGGT  | 22 | 18 |
| 73 | + | 2939 | TTCTATACAGATGAACAGGTG   | 21 | 20 |
| 6  | + | 2942 | TATACAGATGAACAGGTGAAA   | 21 | 2  |
| 5  | + | 2949 | ATGAACAGGTGAAATCAGTGA   | 21 | 9  |
| 1  | + | 2950 | TGAACAGGTGAAATCAGTGA    | 20 | 10 |

|     |   |      |                             |    |    |
|-----|---|------|-----------------------------|----|----|
| 12  | + | 2953 | ACAGGTGAAATCAGTGAAAGG       | 21 | 13 |
| 3   | + | 2955 | AGGTGAAATCAGTGAAAGGAG       | 21 | 15 |
| 12  | + | 2956 | GGTGAAATCAGTGAAAGGAGA       | 21 | 16 |
| 1   | + | 2957 | GTGAAATCAGTGAAAGGAGA        | 20 | 17 |
| 5   | + | 2967 | TGAAAGGAGAAATGAATATGA       | 21 | 6  |
| 8   | + | 2969 | AAAGGAGAAATGAATATGAAA       | 21 | 8  |
| 3   | + | 2972 | GGAGAAATGAATATGAAATAGA      | 22 | 11 |
| 10  | + | 2984 | ATGAAATAGACCAAGTTTGTG       | 21 | 2  |
| 2   | + | 2987 | AAATAGACCAAGTTTGTGAAG       | 21 | 5  |
| 5   | + | 2987 | AAATAGACCAAGTTTGTGAAGA      | 22 | 5  |
| 61  | + | 2988 | AATAGACCAAGTTTGTGAAGA       | 21 | 6  |
| 5   | + | 2997 | AGTTTGTGAAGATGAAAACGA       | 21 | 15 |
| 15  | + | 2999 | TTTGTGAAGATGAAAACGATT       | 21 | 17 |
| 25  | + | 3001 | TGTGAAGATGAAAACGATTGG       | 21 | 19 |
| 6   | + | 3003 | TGAAGATGAAAACGATTGGAGC      | 22 | 0  |
| 12  | + | 3004 | GAAGATGAAAACGATTGGAGC       | 21 | 1  |
| 18  | + | 3005 | AAGATGAAAACGATTGGAGCT       | 21 | 2  |
| 2   | + | 3005 | AAGATGAAAACGATTGGAGCTA      | 22 | 2  |
| 30  | + | 3008 | ATGAAAACGATTGGAGCTATG       | 21 | 5  |
| 7   | + | 3010 | GAAAACGATTGGAGCTATGAG       | 21 | 7  |
| 4   | + | 3017 | ATTGGAGCTATGAGTTTGGACC      | 22 | 14 |
| 42  | + | 3022 | AGCTATGAGTTTGGACCCGTG       | 21 | 19 |
| 4   | + | 3023 | GCTATGAGTTTGGACCCGTGG       | 21 | 20 |
| 5   | + | 3025 | TATGAGTTTGGACCCGTGGAAG      | 22 | 1  |
| 6   | + | 3027 | TGAGTTTGGACCCGTGGAAGC       | 21 | 3  |
| 1   | + | 3029 | AGTTTGGACCCGTGGAAGCAT       | 21 | 5  |
| 4   | + | 3039 | CGTGGAAGCATTGGAATGCTC       | 21 | 15 |
| 5   | + | 3039 | CGTGGAAGCATTGGAATGCTCT      | 22 | 15 |
| 111 | + | 3062 | AAAATAATGGACATAATGATA       | 21 | 17 |
| 8   | + | 3063 | AAATAATGGACATAATGATAGC      | 22 | 18 |
| 3   | + | 3074 | ATAATGATAGCCTAATCTGTA       | 21 | 8  |
| 9   | + | 3080 | ATAGCCTAATCTGTACTTCGA       | 21 | 14 |
| 16  | + | 3081 | TAGCCTAATCTGTACTTCGAA       | 21 | 15 |
| 9   | + | 3084 | CCTAATCTGTACTTCGAACGAA      | 22 | 18 |
| 33  | + | 3087 | AATCTGTACTTCGAACGAAGA       | 21 | 0  |
| 11  | + | 3096 | TTCGAACGAAGACAAGATCGA       | 21 | 9  |
| 5   | + | 3104 | AAGACAAGATCGAAGCCAACA       | 21 | 17 |
| 3   | + | 3105 | AGACAAGATCGAAGCCAACAATACACA | 28 | 18 |
| 9   | + | 3112 | ATCGAAGCCAACAATAACACA       | 21 | 4  |
| 3   | + | 3115 | GAAGCCAACAATAACACAGAT       | 21 | 7  |
| 29  | + | 3123 | CAAATACACAGATTGTTGGAG       | 21 | 15 |
| 2   | + | 3123 | CAAATACACAGATTGTTGGAGT      | 22 | 15 |
| 1   | + | 3124 | AAATACACAGATTGTTGGAG        | 20 | 16 |
| 93  | + | 3125 | AATACACAGATTGTTGGAGTT       | 21 | 17 |

|      |   |      |                           |    |    |
|------|---|------|---------------------------|----|----|
| 49   | + | 3127 | TACACAGATTGTTGGAGTTGGC    | 22 | 19 |
| 4    | + | 3128 | ACACAGATTGTTGGAGTTGGC     | 21 | 20 |
| 50   | + | 3130 | ACAGATTGTTGGAGTTGGCTC     | 21 | 1  |
| 2    | + | 3136 | TGTTGGAGTTGGCTCATCATC     | 21 | 7  |
| 27   | + | 3139 | TGGAGTTGGCTCATCATCTGTT    | 22 | 10 |
| 17   | + | 3157 | TGTTTTGATGTCTCCCATATT     | 21 | 7  |
| 10   | + | 3159 | TTTTGATGTCTCCCATATTGT     | 21 | 9  |
| 17   | + | 3179 | TGAGAAGCATCGGAAGTTTAG     | 21 | 8  |
| 2    | + | 3184 | AGCATCGGAAGTTTAGTTTGGG    | 22 | 13 |
| 11   | + | 3190 | GGAAGTTTAGTTTGGGGAGGA     | 21 | 19 |
| 4    | + | 3200 | TTTGGGGAGGAAGATGAGAGA     | 21 | 8  |
| 1    | + | 3210 | AAGATGAGAGAAGCAAGAAGG     | 21 | 18 |
| 3    | + | 3227 | AAGGAGAATATCAAAGTGGAG     | 21 | 14 |
| 1    | + | 3228 | AGGAGAATATCAAAGTGGAGAA    | 22 | 15 |
| 93   | + | 3228 | AGGAGAATATCAAAGTGGAGA     | 21 | 15 |
| 5    | + | 3236 | ATCAAAGTGGAGAAGTCGAAC     | 21 | 2  |
| 6    | + | 3244 | GGAGAAGTCGAACGAATTTGC     | 21 | 10 |
| 13   | + | 3265 | AAGTGAGGAAAGAATATCTGTT    | 22 | 10 |
| 6    | + | 3266 | AGTGAGGAAAGAATATCTGTT     | 21 | 11 |
| 3    | - | 92   | GTAAATGAGAGAGAAAAGTCTTACG | 25 | 8  |
| 2    | - | 215  | AACCACAATCGATATCCTAGA     | 21 | 5  |
| 4    | - | 215  | AGAACCACAATCGATATCCTAGA   | 23 | 5  |
| 1    | - | 252  | TCAAGCACCAACTCGAAGAAG     | 21 | 0  |
| 143  | - | 282  | TCTTTGCATTTCAAATCTCCA     | 22 | 9  |
| 83   | - | 282  | CTTTGCATTTCAAATCTCCA      | 21 | 9  |
| 164  | - | 283  | TCTTTGCATTTCAAATCTCC      | 21 | 10 |
| 4    | - | 283  | GTCTTTGCATTTCAAATCTCC     | 22 | 10 |
| 1    | - | 286  | TACGTCTTTGCATTTCAAATC     | 22 | 13 |
| 3    | - | 290  | ACTACGTCTTTGCATTTCAA      | 20 | 17 |
| 23   | - | 299  | AGATCGGCATCACTACGTCTT     | 22 | 5  |
| 1    | - | 300  | AGAAGATCGGCATCACTACGTCTT  | 24 | 6  |
| 3    | - | 301  | GAAGATCGGCATCACTACGTCT    | 22 | 7  |
| 21   | - | 302  | AGAAGATCGGCATCACTACGTC    | 22 | 8  |
| 43   | - | 302  | GAAGATCGGCATCACTACGTC     | 21 | 8  |
| 1    | - | 303  | ATAGAAGATCGGCATCACTACGT   | 23 | 9  |
| 2023 | - | 303  | AGAAGATCGGCATCACTACGT     | 21 | 9  |
| 259  | - | 303  | TAGAAGATCGGCATCACTACGT    | 22 | 9  |
| 1664 | - | 304  | TAGAAGATCGGCATCACTACG     | 21 | 10 |
| 168  | - | 304  | ATAGAAGATCGGCATCACTACG    | 22 | 10 |
| 8    | - | 304  | TCATAGAAGATCGGCATCACTACG  | 24 | 10 |
| 20   | - | 305  | TCATAGAAGATCGGCATCACTAC   | 23 | 11 |
| 21   | - | 305  | ATAGAAGATCGGCATCACTAC     | 21 | 11 |
| 4    | - | 306  | TAGAAGATCGGCATCACTA       | 19 | 12 |
| 4    | - | 306  | TCATAGAAGATCGGCATCACTA    | 22 | 12 |

|      |   |     |                                |    |    |
|------|---|-----|--------------------------------|----|----|
| 6    | - | 307 | TCATAGAAGATCGGCATCACT          | 21 | 13 |
| 12   | - | 309 | ATAGAAGATCGGCATCA              | 17 | 15 |
| 9    | - | 309 | CTTCATAGAAGATCGGCATCA          | 21 | 15 |
| 2    | - | 310 | TACTTCATAGAAGATCGGCATC         | 22 | 16 |
| 1    | - | 312 | ATCTACTTCATAGAAGATCGGCA        | 23 | 18 |
| 1    | - | 312 | TCTACTTCATAGAAGATCGGCA         | 22 | 18 |
| 114  | - | 313 | ATCTACTTCATAGAAGATCGGC         | 22 | 19 |
| 2    | - | 313 | CTACTTCATAGAAGATCGGC           | 20 | 19 |
| 846  | - | 313 | TCTACTTCATAGAAGATCGGC          | 21 | 19 |
| 12   | - | 314 | ATCTACTTCATAGAAGATCGG          | 21 | 20 |
| 9    | - | 317 | ATGGATCTACTTCATAGAAGAT         | 22 | 2  |
| 53   | - | 318 | ATGGATCTACTTCATAGAAGA          | 21 | 3  |
| 2    | - | 321 | TCGGATGGATCTACTTCATAGA         | 22 | 6  |
| 13   | - | 323 | ATCGGATGGATCTACTTCATA          | 21 | 8  |
| 4    | - | 323 | CATCGGATGGATCTACTTCATA         | 22 | 8  |
| 1086 | - | 324 | CATCGGATGGATCTACTTCAT          | 21 | 9  |
| 3    | - | 324 | ATCGGATGGATCTACTTCAT           | 20 | 9  |
| 4    | - | 324 | GTACATCGGATGGATCTACTTCAT       | 24 | 9  |
| 1065 | - | 325 | ACATCGGATGGATCTACTTCA          | 21 | 10 |
| 327  | - | 325 | TACATCGGATGGATCTACTTCA         | 22 | 10 |
| 5    | - | 325 | CATCGGATGGATCTACTTCA           | 20 | 10 |
| 1005 | - | 326 | TACATCGGATGGATCTACTTC          | 21 | 11 |
| 11   | - | 326 | CATCGGATGGATCTACTTC            | 19 | 11 |
| 3    | - | 326 | GTACATCGGATGGATCTACTTC         | 22 | 11 |
| 5    | - | 326 | CTGTTTCCGTACATCGGATGGATCTACTTC | 30 | 11 |
| 95   | - | 334 | TGTTTCCGTACATCGGATGGA          | 21 | 19 |
| 9    | - | 336 | TCTGTTTCCGTACATCGGATG          | 21 | 0  |
| 1    | - | 339 | CGGTCTGTTTCCGTACATCGG          | 21 | 3  |
| 11   | - | 341 | TCCGGTCTGTTTCCGTACATC          | 21 | 5  |
| 2    | - | 342 | AATCTCCGGTCTGTTTCCGTACAT       | 24 | 6  |
| 4    | - | 342 | CTCCGGTCTGTTTCCGTACAT          | 21 | 6  |
| 8    | - | 342 | TCTCCGGTCTGTTTCCGTACAT         | 22 | 6  |
| 20   | - | 343 | TCTCCGGTCTGTTTCCGTACA          | 21 | 7  |
| 30   | - | 344 | ATCTCCGGTCTGTTTCCGTAC          | 21 | 8  |
| 1449 | - | 345 | AATCTCCGGTCTGTTTCCGTA          | 21 | 9  |
| 15   | - | 345 | AAATCTCCGGTCTGTTTCCGTA         | 22 | 9  |
| 1    | - | 345 | AAAATCTCCGGTCTGTTTCCGTA        | 23 | 9  |
| 2    | - | 345 | ATCTCCGGTCTGTTTCCGTA           | 20 | 9  |
| 3    | - | 345 | CAAAATCTCCGGTCTGTTTCCGTA       | 24 | 9  |
| 1254 | - | 346 | AAATCTCCGGTCTGTTTCCGT          | 21 | 10 |
| 1    | - | 346 | AATCTCCGGTCTGTTTCCGT           | 20 | 10 |
| 44   | - | 346 | AAAATCTCCGGTCTGTTTCCGT         | 22 | 10 |
| 5    | - | 346 | CAAAATCTCCGGTCTGTTTCCGT        | 23 | 10 |
| 1    | - | 347 | AAATCTCCGGTCTGTTTCCG           | 20 | 11 |



|     |   |     |                          |    |    |
|-----|---|-----|--------------------------|----|----|
| 246 | - | 347 | CAAAATCTCCGGTCTGTTTCCG   | 22 | 11 |
| 582 | - | 347 | AAAATCTCCGGTCTGTTTCCG    | 21 | 11 |
| 2   | - | 348 | CAAAATCTCCGGTCTGTTTCC    | 21 | 12 |
| 190 | - | 366 | TATTTTTGAAGGCCTTCCCAA    | 21 | 9  |
| 1   | - | 366 | ATTTTTGAAGGCCTTCCCAA     | 20 | 9  |
| 8   | - | 366 | CTATTTTTGAAGGCCTTCCCAA   | 22 | 9  |
| 171 | - | 367 | CTATTTTTGAAGGCCTTCCCA    | 21 | 10 |
| 17  | - | 367 | ACTATTTTTGAAGGCCTTCCCA   | 22 | 10 |
| 94  | - | 368 | ACTATTTTTGAAGGCCTTCCC    | 21 | 11 |
| 1   | - | 369 | CAACTATTTTTGAAGGCCTTCC   | 22 | 12 |
| 37  | - | 369 | AACTATTTTTGAAGGCCTTCC    | 21 | 12 |
| 10  | - | 374 | TTTTACAAC TATTTTTGAAGGC  | 22 | 17 |
| 35  | - | 374 | TTACAAC TATTTTTGAAGGC    | 21 | 17 |
| 2   | - | 375 | CTTTACAAC TATTTTTGAAGG   | 22 | 18 |
| 28  | - | 376 | CTTTACAAC TATTTTTGAAG    | 21 | 19 |
| 7   | - | 380 | TTACTTTTACAAC TATTTTT    | 21 | 2  |
| 17  | - | 387 | CCTTAGTTTTACTTTTACAAC    | 21 | 9  |
| 154 | - | 388 | TCCTTAGTTTTACTTTTACAA    | 21 | 10 |
| 6   | - | 389 | TCCTTAGTTTTACTTTTACA     | 20 | 11 |
| 1   | - | 402 | CATCTCTGCCTCTCCTCCTTAG   | 22 | 3  |
| 1   | - | 408 | TTGGATCCATCTCTGCCTCTCCT  | 23 | 9  |
| 21  | - | 408 | GGATCCATCTCTGCCTCTCCT    | 21 | 9  |
| 146 | - | 409 | TTGGATCCATCTCTGCCTCTCC   | 22 | 10 |
| 300 | - | 409 | TGGATCCATCTCTGCCTCTCC    | 21 | 10 |
| 15  | - | 410 | CTTGGATCCATCTCTGCCTCTC   | 22 | 11 |
| 1   | - | 410 | TGGATCCATCTCTGCCTCTC     | 20 | 11 |
| 772 | - | 410 | TTGGATCCATCTCTGCCTCTC    | 21 | 11 |
| 1   | - | 411 | TTGGATCCATCTCTGCCTCT     | 20 | 12 |
| 229 | - | 411 | CTTGGATCCATCTCTGCCTCT    | 21 | 12 |
| 7   | - | 412 | GCTTGGATCCATCTCTGCCTC    | 21 | 13 |
| 104 | - | 417 | TTAAAGCTTGGATCCATCTCT    | 21 | 18 |
| 4   | - | 417 | ATTAAAGCTTGGATCCATCTCT   | 22 | 18 |
| 1   | - | 418 | AAAATTAAAGCTTGGATCCATCTC | 24 | 19 |
| 216 | - | 418 | ATTAAAGCTTGGATCCATCTC    | 21 | 19 |
| 1   | - | 419 | AAATTAAAGCTTGGATCCATCT   | 22 | 20 |
| 1   | - | 419 | TTAAAGCTTGGATCCATCT      | 19 | 20 |
| 3   | - | 419 | AATTAAAGCTTGGATCCATCT    | 21 | 20 |
| 40  | - | 420 | AAAATTAAAGCTTGGATCCATC   | 22 | 0  |
| 6   | - | 420 | AAATTAAAGCTTGGATCCATC    | 21 | 0  |
| 36  | - | 421 | TTAAAGCTTGGATCCAT        | 17 | 1  |
| 4   | - | 422 | AAAAATTAAAGCTTGGATCCA    | 21 | 2  |
| 15  | - | 429 | TGCCAACAAAAATTAAAGCTT    | 21 | 9  |
| 1   | - | 430 | TGCCAACAAAAATTAAAGCT     | 20 | 10 |
| 236 | - | 430 | TTGCCAACAAAAATTAAAGCT    | 21 | 10 |

|     |   |     |                          |    |    |
|-----|---|-----|--------------------------|----|----|
| 38  | - | 431 | GTTGCCAACAAAAATTAAAGC    | 21 | 11 |
| 1   | - | 432 | TTGCCAACAAAAATTAAAG      | 19 | 12 |
| 8   | - | 432 | TGTTGCCAACAAAAATTAAAG    | 21 | 12 |
| 23  | - | 439 | TCCAGCTATGTTGCCAACAAAA   | 22 | 19 |
| 3   | - | 440 | TCCAGCTATGTTGCCAACAAA    | 21 | 20 |
| 8   | - | 442 | TCTCCAGCTATGTTGCCAACA    | 21 | 1  |
| 4   | - | 445 | TGTTCTCCAGCTATGTTGCCA    | 21 | 4  |
| 22  | - | 447 | AGTGTCTCCAGCTATGTTGC     | 21 | 6  |
| 54  | - | 449 | CGAGTGTTCTCCAGCTATGTT    | 21 | 8  |
| 18  | - | 451 | AGCGAGTGTTCTCCAGCTATG    | 21 | 10 |
| 46  | - | 452 | TCAGCGAGTGTTCTCCAGCTAT   | 22 | 11 |
| 106 | - | 453 | TCAGCGAGTGTTCTCCAGCTA    | 21 | 12 |
| 14  | - | 454 | TTCAGCGAGTGTTCTCCAGCT    | 21 | 13 |
| 6   | - | 454 | TTTCAGCGAGTGTTCTCCAGCT   | 22 | 13 |
| 51  | - | 455 | TTTCAGCGAGTGTTCTCCAGC    | 21 | 14 |
| 1   | - | 456 | ATTCAGCGAGTGTTCTCCAG     | 21 | 15 |
| 2   | - | 456 | CATTCAGCGAGTGTTCTCCAG    | 22 | 15 |
| 19  | - | 457 | TTTCAGCGAGTGTTCTCCA      | 19 | 16 |
| 2   | - | 478 | ATCATATCCGCTTCATTTCC     | 21 | 16 |
| 15  | - | 481 | TCAATCATATCCGCTTCATTT    | 21 | 19 |
| 13  | - | 482 | TTCAATCATATCCGCTTCATT    | 21 | 20 |
| 23  | - | 483 | TTTCAATCATATCCGCTTCAT    | 21 | 0  |
| 2   | - | 486 | TCTTTTCAATCATATCCGCTT    | 21 | 3  |
| 121 | - | 489 | CTATCTTTTCAATCATATCCG    | 21 | 6  |
| 7   | - | 489 | CTTTTCAATCATATCCG        | 17 | 6  |
| 4   | - | 492 | TTGGCTATCTTTTCAATCATAT   | 22 | 9  |
| 62  | - | 493 | TTTGGCTATCTTTTCAATCATA   | 22 | 10 |
| 65  | - | 493 | TTGGCTATCTTTTCAATCATA    | 21 | 10 |
| 18  | - | 494 | TTTGGCTATCTTTTCAATCAT    | 21 | 11 |
| 123 | - | 496 | TCTTTGGCTATCTTTTCAATC    | 21 | 13 |
| 4   | - | 496 | TTTGGCTATCTTTTCAATC      | 19 | 13 |
| 9   | - | 501 | AAACATCTTTGGCTATCTTTT    | 21 | 18 |
| 113 | - | 502 | TGAAACATCTTTGGCTATCTTT   | 22 | 19 |
| 22  | - | 503 | TGAAACATCTTTGGCTATCTT    | 21 | 20 |
| 3   | - | 504 | TATCTGAAACATCTTTGGCTATCT | 24 | 0  |
| 70  | - | 505 | TCTGAAACATCTTTGGCTATC    | 21 | 1  |
| 9   | - | 505 | ATCTGAAACATCTTTGGCTATC   | 22 | 1  |
| 15  | - | 506 | ATCTGAAACATCTTTGGCTAT    | 21 | 2  |
| 29  | - | 507 | TATCTGAAACATCTTTGGCTA    | 21 | 3  |
| 29  | - | 508 | TTATCTGAAACATCTTTGGCT    | 21 | 4  |
| 2   | - | 509 | GTTTATCTGAAACATCTTTGGC   | 22 | 5  |
| 5   | - | 509 | TTTATCTGAAACATCTTTGGC    | 21 | 5  |
| 7   | - | 528 | TTAGAAGGTGTAGCATTTCAGTT  | 22 | 3  |
| 53  | - | 529 | TTAGAAGGTGTAGCATTTCAGT   | 21 | 4  |

|     |   |     |                              |    |    |
|-----|---|-----|------------------------------|----|----|
| 8   | - | 529 | TTTAGAAGGTGTAGCATTTCAGT      | 22 | 4  |
| 1   | - | 530 | TTAGAAGGTGTAGCATTTCAG        | 20 | 5  |
| 23  | - | 530 | TTTAGAAGGTGTAGCATTTCAG       | 21 | 5  |
| 37  | - | 532 | TCTTTAGAAGGTGTAGCATTC        | 21 | 7  |
| 2   | - | 533 | AAAATCTTTAGAAGGTGTAGCATT     | 24 | 8  |
| 74  | - | 533 | ATCTTTAGAAGGTGTAGCATT        | 21 | 8  |
| 26  | - | 535 | AAATCTTTAGAAGGTGTAGCA        | 21 | 10 |
| 4   | - | 536 | TCAAAATCTTTAGAAGGTGTAGC      | 23 | 11 |
| 68  | - | 536 | AAAATCTTTAGAAGGTGTAGC        | 21 | 11 |
| 58  | - | 537 | TCAAAATCTTTAGAAGGTGTAG       | 22 | 12 |
| 165 | - | 538 | TCAAAATCTTTAGAAGGTGTA        | 21 | 13 |
| 6   | - | 538 | ATCAAAATCTTTAGAAGGTGTA       | 22 | 13 |
| 31  | - | 539 | ATCAAAATCTTTAGAAGGTGT        | 21 | 14 |
| 24  | - | 540 | CATCAAAATCTTTAGAAGGTG        | 21 | 15 |
| 1   | - | 544 | AAATGCATCAAAATCTTTAGAA       | 22 | 19 |
| 3   | - | 544 | AATGCATCAAAATCTTTAGAA        | 21 | 19 |
| 286 | - | 545 | AAATGCATCAAAATCTTTAGA        | 21 | 20 |
| 8   | - | 549 | CCACAAATGCATCAAAATCTT        | 21 | 3  |
| 8   | - | 551 | CCACAAATGCATCAAAATC          | 19 | 5  |
| 5   | - | 554 | AAGTCCCACAAATGCATCAA         | 21 | 8  |
| 31  | - | 555 | CAAGTCCCACAAATGCATCAA        | 21 | 9  |
| 21  | - | 556 | TCAAGTCCCACAAATGCATCA        | 21 | 10 |
| 43  | - | 557 | CTCAAGTCCCACAAATGCATC        | 21 | 11 |
| 6   | - | 557 | ACTCAAGTCCCACAAATGCATC       | 22 | 11 |
| 21  | - | 558 | ACTCAAGTCCCACAAATGCAT        | 21 | 12 |
| 4   | - | 558 | AACTCAAGTCCCACAAATGCAT       | 22 | 12 |
| 113 | - | 559 | AACTCAAGTCCCACAAATGCA        | 21 | 13 |
| 1   | - | 559 | AACTCAAGTCCCACAAATGCA        | 22 | 13 |
| 11  | - | 560 | AACTCAAGTCCCACAAATGC         | 21 | 14 |
| 7   | - | 561 | TGAAACTCAAGTCCCACAAATG       | 22 | 15 |
| 15  | - | 566 | AATGTGAAACTCAAGTCCCAC        | 21 | 20 |
| 6   | - | 566 | TAATGTGAAACTCAAGTCCCAC       | 22 | 20 |
| 101 | - | 567 | TAATGTGAAACTCAAGTCCCA        | 21 | 0  |
| 1   | - | 567 | CTAATGTGAAACTCAAGTCCCA       | 22 | 0  |
| 3   | - | 567 | TTAATTCCTAATGTGAAACTCAAGTCCC | 31 | 0  |
| 17  | - | 568 | TCCCTAATGTGAAACTCAAGTCCC     | 24 | 1  |
| 85  | - | 568 | CTAATGTGAAACTCAAGTCCC        | 21 | 1  |
| 6   | - | 569 | CCCTAATGTGAAACTCAAGTCC       | 22 | 2  |
| 16  | - | 570 | CCCTAATGTGAAACTCAAGTC        | 21 | 3  |
| 109 | - | 573 | ATCCCTAATGTGAAACTCAA         | 21 | 6  |
| 2   | - | 573 | TTCCCTAATGTGAAACTCAA         | 20 | 6  |
| 2   | - | 578 | ACTTAATTCCTAATGTGAAA         | 21 | 11 |
| 44  | - | 579 | AACTTAATTCCTAATGTGAA         | 21 | 12 |
| 4   | - | 579 | ACTTAATTCCTAATGTGAA          | 20 | 12 |

|      |   |     |                        |    |    |
|------|---|-----|------------------------|----|----|
| 5    | - | 580 | GAACTTAATTCCCTAATGTGA  | 21 | 13 |
| 7    | - | 580 | AGAACTTAATTCCCTAATGTGA | 22 | 13 |
| 83   | - | 587 | TAGCAGAGAACTTAATTCCCT  | 21 | 20 |
| 12   | - | 588 | ATAGCAGAGAACTTAATTCCC  | 21 | 0  |
| 5    | - | 588 | TATAGCAGAGAACTTAATTCCC | 22 | 0  |
| 33   | - | 589 | TATAGCAGAGAACTTAATTCC  | 21 | 1  |
| 18   | - | 594 | CTAGGTATAGCAGAGAACTTA  | 21 | 6  |
| 182  | - | 595 | TCTAGGTATAGCAGAGAACTT  | 21 | 7  |
| 108  | - | 597 | TAGTCTAGGTATAGCAGAGAAC | 22 | 9  |
| 19   | - | 598 | TAGTCTAGGTATAGCAGAGAA  | 21 | 10 |
| 4    | - | 598 | ATAGTCTAGGTATAGCAGAGAA | 22 | 10 |
| 53   | - | 599 | CATAGTCTAGGTATAGCAGAGA | 22 | 11 |
| 6059 | - | 599 | ATAGTCTAGGTATAGCAGAGA  | 21 | 11 |
| 9    | - | 599 | TAGTCTAGGTATAGCAGAGA   | 20 | 11 |
| 1    | - | 600 | TAGTCTAGGTATAGCAGAG    | 19 | 12 |
| 1    | - | 600 | TCATAGTCTAGGTATAGCAGAG | 22 | 12 |
| 6    | - | 600 | ATAGTCTAGGTATAGCAGAG   | 20 | 12 |
| 92   | - | 600 | CATAGTCTAGGTATAGCAGAG  | 21 | 12 |
| 1139 | - | 601 | TCATAGTCTAGGTATAGCAGA  | 21 | 13 |
| 29   | - | 601 | ATAGTCTAGGTATAGCAGA    | 19 | 13 |
| 3    | - | 601 | CATAGTCTAGGTATAGCAGA   | 20 | 13 |
| 533  | - | 601 | CTCATAGTCTAGGTATAGCAGA | 22 | 13 |
| 71   | - | 602 | CTCATAGTCTAGGTATAGCAG  | 21 | 14 |
| 1    | - | 603 | GCTCATAGTCTAGGTATAGCA  | 21 | 15 |
| 3    | - | 603 | TGCTCATAGTCTAGGTATAGCA | 22 | 15 |
| 72   | - | 604 | TTGCTCATAGTCTAGGTATAGC | 22 | 16 |
| 9    | - | 604 | TGCTCATAGTCTAGGTATAGC  | 21 | 16 |
| 8    | - | 605 | TTGCTCATAGTCTAGGTATAG  | 21 | 17 |
| 1    | - | 607 | ACTTGCTCATAGTCTAGGTAT  | 21 | 19 |
| 26   | - | 608 | CACTTGCTCATAGTCTAGGTA  | 21 | 20 |
| 4    | - | 608 | TCACTTGCTCATAGTCTAGGTA | 22 | 20 |
| 102  | - | 609 | TCACTTGCTCATAGTCTAGGT  | 21 | 0  |
| 12   | - | 609 | CTCACTTGCTCATAGTCTAGGT | 22 | 0  |
| 1    | - | 610 | CCTCACTTGCTCATAGTCTAGG | 22 | 1  |
| 39   | - | 610 | CTCACTTGCTCATAGTCTAGG  | 21 | 1  |
| 12   | - | 611 | CCTCACTTGCTCATAGTCTAG  | 21 | 2  |
| 6    | - | 611 | TCCTCACTTGCTCATAGTCTAG | 22 | 2  |
| 22   | - | 612 | TCCTCACTTGCTCATAGTCTA  | 21 | 3  |
| 13   | - | 614 | TATCCTCACTTGCTCATAGTC  | 21 | 5  |
| 4    | - | 614 | CTATCCTCACTTGCTCATAGTC | 22 | 5  |
| 24   | - | 616 | TACTATCCTCACTTGCTCATAG | 22 | 7  |
| 4    | - | 616 | ACTATCCTCACTTGCTCATAG  | 21 | 7  |
| 5    | - | 617 | TACTATCCTCACTTGCTCATA  | 21 | 8  |
| 55   | - | 618 | CTACTATCCTCACTTGCTCAT  | 21 | 9  |

|     |   |     |                          |    |    |
|-----|---|-----|--------------------------|----|----|
| 14  | - | 619 | CCTACTATCCTCACTTGCTCA    | 21 | 10 |
| 52  | - | 619 | TCCTACTATCCTCACTTGCTCA   | 22 | 10 |
| 39  | - | 620 | TCCTACTATCCTCACTTGCTC    | 21 | 11 |
| 9   | - | 620 | TTCCTACTATCCTCACTTGCTC   | 22 | 11 |
| 116 | - | 621 | TTCCTACTATCCTCACTTGCT    | 21 | 12 |
| 144 | - | 622 | ATTCCTACTATCCTCACTTGC    | 21 | 13 |
| 4   | - | 622 | CAGATTCCTACTATCCTCACTTGC | 24 | 13 |
| 12  | - | 625 | CAGATTCCTACTATCCTCACT    | 21 | 16 |
| 17  | - | 625 | ACAGATTCCTACTATCCTCACT   | 22 | 16 |
| 24  | - | 629 | GCCACAGATTCCTACTATCCT    | 21 | 20 |
| 7   | - | 633 | CAGGGCCACAGATTCCTACTA    | 21 | 3  |
| 132 | - | 636 | CTGCAGGGCCACAGATTCCTA    | 21 | 6  |
| 1   | - | 637 | CCTGCAGGGCCACAGATTCCT    | 21 | 7  |
| 62  | - | 640 | CTGCAGGGCCACAGATT        | 17 | 10 |
| 70  | - | 640 | ATTCCTGCAGGGCCACAGATT    | 21 | 10 |
| 3   | - | 642 | GATTCCTGCAGGGCCACAGA     | 20 | 12 |
| 22  | - | 644 | ACCGATTCCTGCAGGGCCACA    | 21 | 14 |
| 31  | - | 644 | TACCGATTCCTGCAGGGCCACA   | 22 | 14 |
| 64  | - | 646 | TTACCGATTCCTGCAGGGCCA    | 21 | 16 |
| 13  | - | 647 | CTTACCGATTCCTGCAGGGCC    | 21 | 17 |
| 86  | - | 648 | TCTTACCGATTCCTGCAGGGC    | 21 | 18 |
| 24  | - | 649 | GTCTTACCGATTCCTGCAGGG    | 21 | 19 |
| 13  | - | 650 | AGTCTTACCGATTCCTGCAGG    | 21 | 20 |
| 1   | - | 650 | GTCTTACCGATTCCTGCAGG     | 20 | 20 |
| 49  | - | 650 | TAGTCTTACCGATTCCTGCAGG   | 22 | 20 |
| 3   | - | 651 | GTAGTCTTACCGATTCCTGCAG   | 22 | 0  |
| 43  | - | 651 | TAGTCTTACCGATTCCTGCAG    | 21 | 0  |
| 12  | - | 652 | GTAGTCTTACCGATTCCTGCA    | 21 | 1  |
| 4   | - | 659 | AGCAATGGTAGTCTTACCGAT    | 21 | 8  |
| 7   | - | 660 | AGCAATGGTAGTCTTACCGA     | 20 | 9  |
| 1   | - | 661 | GAGCAATGGTAGTCTTACCG     | 20 | 10 |
| 40  | - | 661 | CGAGCAATGGTAGTCTTACCG    | 21 | 10 |
| 1   | - | 663 | GCACGAGCAATGGTAGTCTTAC   | 22 | 12 |
| 10  | - | 664 | GCACGAGCAATGGTAGTCTTA    | 21 | 13 |
| 109 | - | 665 | AGCACGAGCAATGGTAGTCTT    | 21 | 14 |
| 4   | - | 665 | AAGCACGAGCAATGGTAGTCTT   | 22 | 14 |
| 23  | - | 666 | AAGCACGAGCAATGGTAGTCT    | 21 | 15 |
| 3   | - | 666 | AAAGCACGAGCAATGGTAGTCT   | 22 | 15 |
| 41  | - | 667 | AAAGCACGAGCAATGGTAGTC    | 21 | 16 |
| 17  | - | 668 | TAAAGCACGAGCAATGGTAGT    | 21 | 17 |
| 5   | - | 668 | TTGTAAAGCACGAGCAATGGTAGT | 24 | 17 |
| 40  | - | 670 | TGTAAAGCACGAGCAATGGTA    | 21 | 19 |
| 26  | - | 671 | TTGTAAAGCACGAGCAATGGT    | 21 | 20 |
| 4   | - | 672 | CTTTGTAAAGCACGAGCAATGG   | 22 | 0  |

|     |   |     |                           |    |    |
|-----|---|-----|---------------------------|----|----|
| 87  | - | 672 | TTTGTAAGCACGAGCAATGG      | 21 | 0  |
| 2   | - | 675 | GGCTTTGTAAAGCACGAGCAA     | 21 | 3  |
| 13  | - | 676 | AGGCTTTGTAAAGCACGAGCA     | 21 | 4  |
| 1   | - | 680 | TAGAGAGTAGGCTTTGTAAAGCACG | 25 | 8  |
| 14  | - | 682 | AGAGAGTAGGCTTTGTAAAGCA    | 22 | 10 |
| 15  | - | 682 | GAGAGTAGGCTTTGTAAAGCA     | 21 | 10 |
| 11  | - | 683 | AGAGAGTAGGCTTTGTAAAGC     | 21 | 11 |
| 142 | - | 683 | TAGAGAGTAGGCTTTGTAAAGC    | 22 | 11 |
| 1   | - | 684 | AGAGAGTAGGCTTTGTAAAG      | 20 | 12 |
| 1   | - | 684 | GAGAGTAGGCTTTGTAAAG       | 19 | 12 |
| 615 | - | 684 | TAGAGAGTAGGCTTTGTAAAG     | 21 | 12 |
| 6   | - | 684 | CTAGAGAGTAGGCTTTGTAAAG    | 22 | 12 |
| 38  | - | 685 | CTAGAGAGTAGGCTTTGTAAA     | 21 | 13 |
| 147 | - | 687 | TTGCTAGAGAGTAGGCTTTGTA    | 22 | 15 |
| 438 | - | 687 | TGCTAGAGAGTAGGCTTTGTA     | 21 | 15 |
| 22  | - | 688 | TTGCTAGAGAGTAGGCTTTGT     | 21 | 16 |
| 30  | - | 688 | ATTGCTAGAGAGTAGGCTTTGT    | 22 | 16 |
| 7   | - | 689 | ATTGCTAGAGAGTAGGCTTTG     | 21 | 17 |
| 27  | - | 690 | AATTGCTAGAGAGTAGGCTTT     | 21 | 18 |
| 9   | - | 691 | AAATTGCTAGAGAGTAGGCTT     | 21 | 19 |
| 10  | - | 692 | GAAAATTGCTAGAGAGTAGGCT    | 22 | 20 |
| 137 | - | 692 | AAAATTGCTAGAGAGTAGGCT     | 21 | 20 |
| 126 | - | 693 | GAAAATTGCTAGAGAGTAGGC     | 21 | 0  |
| 15  | - | 693 | TGAAAATTGCTAGAGAGTAGGC    | 22 | 0  |
| 1   | - | 693 | AAAATTGCTAGAGAGTAGGC      | 20 | 0  |
| 599 | - | 694 | TGAAAATTGCTAGAGAGTAGG     | 21 | 1  |
| 1   | - | 695 | AAAATTGCTAGAGAGTAG        | 18 | 2  |
| 3   | - | 695 | CTGAAAATTGCTAGAGAGTAG     | 21 | 2  |
| 10  | - | 696 | GAAAATTGCTAGAGAGTA        | 18 | 3  |
| 15  | - | 696 | GCTGAAAATTGCTAGAGAGTA     | 21 | 3  |
| 26  | - | 697 | TCGCTGAAAATTGCTAGAGAGT    | 22 | 4  |
| 92  | - | 697 | CGCTGAAAATTGCTAGAGAGT     | 21 | 4  |
| 2   | - | 698 | ACTTCGCTGAAAATTGCTAGAGAG  | 24 | 5  |
| 2   | - | 698 | TTCGCTGAAAATTGCTAGAGAG    | 22 | 5  |
| 289 | - | 699 | TTCGCTGAAAATTGCTAGAGA     | 21 | 6  |
| 19  | - | 701 | AACTTCGCTGAAAATTGCTAGA    | 22 | 8  |
| 80  | - | 701 | ACTTCGCTGAAAATTGCTAGA     | 21 | 8  |
| 5   | - | 702 | AACTTCGCTGAAAATTGCTAG     | 21 | 9  |
| 21  | - | 703 | CAACTTCGCTGAAAATTGCTA     | 21 | 10 |
| 141 | - | 704 | CAACTTCGCTGAAAATTGCT      | 21 | 11 |
| 2   | - | 705 | AACAACCTTCGCTGAAAATTGC    | 21 | 12 |
| 7   | - | 707 | TAAAACAACCTTCGCTGAAAATT   | 22 | 14 |
| 8   | - | 707 | AAAACAACCTTCGCTGAAAATT    | 21 | 14 |
| 1   | - | 708 | ACAACCTTCGCTGAAAAT        | 17 | 15 |

|     |   |     |                          |    |    |
|-----|---|-----|--------------------------|----|----|
| 6   | - | 708 | TAAAACAACCTTCGCTGAAAAT   | 21 | 15 |
| 4   | - | 709 | ATAAAACAACCTTCGCTGAAAA   | 21 | 16 |
| 3   | - | 711 | CCATAAAACAACCTTCGCTGAA   | 21 | 18 |
| 4   | - | 711 | TCCATAAAACAACCTTCGCTGAA  | 22 | 18 |
| 39  | - | 712 | CTCCATAAAACAACCTTCGCTGA  | 22 | 19 |
| 90  | - | 712 | TCCATAAAACAACCTTCGCTGA   | 21 | 19 |
| 4   | - | 713 | CTCCATAAAACAACCTTCGCTG   | 21 | 20 |
| 40  | - | 714 | TTCTCCATAAAACAACCTTCGCT  | 22 | 0  |
| 91  | - | 714 | TCTCCATAAAACAACCTTCGCT   | 21 | 0  |
| 107 | - | 715 | TTCTCCATAAAACAACCTTCGC   | 21 | 1  |
| 118 | - | 715 | ATTCTCCATAAAACAACCTTCGC  | 22 | 1  |
| 46  | - | 716 | ATTCTCCATAAAACAACCTTCG   | 21 | 2  |
| 4   | - | 726 | TCCCCTAACATTCTCCATAA     | 20 | 12 |
| 12  | - | 727 | TTCCCCTAACATTCTCCATA     | 20 | 13 |
| 6   | - | 728 | ACTTCCCCTAACATTCTCCAT    | 21 | 14 |
| 1   | - | 729 | AGACTTCCCCTAACATTCTCCA   | 22 | 15 |
| 10  | - | 730 | AGACTTCCCCTAACATTCTCC    | 21 | 16 |
| 6   | - | 730 | GACTTCCCCTAACATTCTCC     | 20 | 16 |
| 1   | - | 731 | AAGACTTCCCCTAACATTCTC    | 21 | 17 |
| 4   | - | 731 | TAAGACTTCCCCTAACATTCTC   | 22 | 17 |
| 11  | - | 732 | TTAAGACTTCCCCTAACATTCT   | 22 | 18 |
| 3   | - | 733 | TTAAGACTTCCCCTAACATTC    | 21 | 19 |
| 11  | - | 734 | ATTAAGACTTCCCCTAACATT    | 21 | 20 |
| 30  | - | 734 | TATTAAGACTTCCCCTAACATT   | 22 | 20 |
| 40  | - | 735 | TATTAAGACTTCCCCTAACAT    | 21 | 0  |
| 133 | - | 736 | AATATTAAGACTTCCCCTAACA   | 22 | 1  |
| 251 | - | 736 | ATATTAAGACTTCCCCTAACA    | 21 | 1  |
| 2   | - | 736 | TATTAAGACTTCCCCTAACA     | 20 | 1  |
| 3   | - | 737 | CAATATTAAGACTTCCCCTAAC   | 22 | 2  |
| 87  | - | 737 | AATATTAAGACTTCCCCTAAC    | 21 | 2  |
| 1   | - | 738 | CCAATATTAAGACTTCCCCTAA   | 22 | 3  |
| 3   | - | 741 | GCCCAATATTAAGACTTCCCC    | 21 | 6  |
| 9   | - | 742 | AAGCCCAATATTAAGACTTCCC   | 22 | 7  |
| 2   | - | 746 | CTCGTCAAGCCCAATATTAAGACT | 24 | 11 |
| 5   | - | 747 | CTCGTCAAGCCCAATATTAAGAC  | 23 | 12 |
| 15  | - | 748 | ACTCGTCAAGCCCAATATTAAGA  | 23 | 13 |
| 3   | - | 748 | TCGTCAAGCCCAATATTAAGA    | 21 | 13 |
| 5   | - | 748 | CTCGTCAAGCCCAATATTAAGA   | 22 | 13 |
| 7   | - | 749 | ATACTCGTCAAGCCCAATATTAAG | 24 | 14 |
| 83  | - | 752 | ATACTCGTCAAGCCCAATATT    | 21 | 17 |
| 27  | - | 753 | CCATACTCGTCAAGCCCAATAT   | 22 | 18 |
| 5   | - | 754 | ACCATACTCGTCAAGCCCAATA   | 22 | 19 |
| 16  | - | 755 | ACCATACTCGTCAAGCCCAAT    | 21 | 20 |
| 17  | - | 757 | AGACCATACTCGTCAAGCCCA    | 21 | 1  |

|     |   |     |                         |    |    |
|-----|---|-----|-------------------------|----|----|
| 5   | - | 757 | GACCATACTCGTCAAGCCCA    | 20 | 1  |
| 48  | - | 758 | CAGACCATACTCGTCAAGCCC   | 21 | 2  |
| 8   | - | 758 | TCAGACCATACTCGTCAAGCCC  | 22 | 2  |
| 13  | - | 759 | TTCAGACCATACTCGTCAAGCC  | 22 | 3  |
| 61  | - | 759 | TCAGACCATACTCGTCAAGCC   | 21 | 3  |
| 2   | - | 760 | TCAGACCATACTCGTCAAGC    | 20 | 4  |
| 4   | - | 760 | TTCAGACCATACTCGTCAAGC   | 21 | 4  |
| 38  | - | 761 | CTTCAGACCATACTCGTCAAG   | 21 | 5  |
| 9   | - | 761 | ACTTCAGACCATACTCGTCAAG  | 22 | 5  |
| 8   | - | 762 | ACTTCAGACCATACTCGTCAA   | 21 | 6  |
| 6   | - | 763 | AACTTCAGACCATACTCGTCA   | 21 | 7  |
| 107 | - | 764 | TAACTTCAGACCATACTCGTC   | 21 | 8  |
| 4   | - | 765 | CTAACTTCAGACCATACTCGT   | 21 | 9  |
| 85  | - | 765 | TCTAACTTCAGACCATACTCGT  | 22 | 9  |
| 142 | - | 766 | TCTAACTTCAGACCATACTCG   | 21 | 10 |
| 37  | - | 766 | ATCTAACTTCAGACCATACTCG  | 22 | 10 |
| 100 | - | 767 | ATCTAACTTCAGACCATACTC   | 21 | 11 |
| 16  | - | 768 | AATCTAACTTCAGACCATACT   | 21 | 12 |
| 2   | - | 768 | TAAATCTAACTTCAGACCATACT | 23 | 12 |
| 3   | - | 769 | TAAATCTAACTTCAGACCATAC  | 22 | 13 |
| 159 | - | 770 | TAAATCTAACTTCAGACCATA   | 21 | 14 |
| 13  | - | 772 | TGTAAATCTAACTTCAGACCA   | 21 | 16 |
| 1   | - | 772 | TTGTAAATCTAACTTCAGACCA  | 22 | 16 |
| 31  | - | 773 | TTGTAAATCTAACTTCAGACC   | 21 | 17 |
| 9   | - | 775 | TTCTTGTAATCTAACTTCAGA   | 22 | 19 |
| 5   | - | 776 | TTCTTGTAATCTAACTTCAG    | 21 | 20 |
| 132 | - | 778 | TCGTTCTTGTAATCTAACTTC   | 22 | 1  |
| 59  | - | 778 | CGTTCTTGTAATCTAACTTC    | 21 | 1  |
| 232 | - | 779 | TCGTTCTTGTAATCTAACTT    | 21 | 2  |
| 12  | - | 781 | AGTCGTTCTTGTAATCTAAC    | 21 | 4  |
| 22  | - | 783 | GAAGTCGTTCTTGTAATCTA    | 21 | 6  |
| 1   | - | 788 | TTTGAAAGAAGTCGTTCTTGTA  | 23 | 11 |
| 4   | - | 788 | TTGAAAGAAGTCGTTCTTGTA   | 22 | 11 |
| 1   | - | 789 | TGAAAGAAGTCGTTCTTGTA    | 20 | 12 |
| 33  | - | 789 | TTGAAAGAAGTCGTTCTTGTA   | 21 | 12 |
| 33  | - | 789 | TTTGAAAGAAGTCGTTCTTGTA  | 22 | 12 |
| 63  | - | 790 | TTTGAAAGAAGTCGTTCTTGT   | 21 | 13 |
| 2   | - | 792 | TCTTTGAAAGAAGTCGTTCTT   | 21 | 15 |
| 6   | - | 792 | ATCTTTGAAAGAAGTCGTTCTT  | 22 | 15 |
| 10  | - | 794 | AATCTTTGAAAGAAGTCGTTT   | 21 | 17 |
| 7   | - | 795 | TAATCTTTGAAAGAAGTCGTT   | 21 | 18 |
| 5   | - | 798 | TCATAATCTTTGAAAGAAGTC   | 21 | 0  |
| 4   | - | 799 | TTCATAATCTTTGAAAGAAGT   | 21 | 1  |
| 13  | - | 802 | GGTTCATAATCTTTGAAAGA    | 20 | 4  |



|     |   |     |                         |    |    |
|-----|---|-----|-------------------------|----|----|
| 57  | - | 804 | TTTGGTTCATAATCTTTGAAA   | 21 | 6  |
| 1   | - | 805 | TTTGGTTCATAATCTTTGAA    | 20 | 7  |
| 38  | - | 805 | TTTTGGTTCATAATCTTTGAA   | 21 | 7  |
| 13  | - | 806 | CTTTTGGTTCATAATCTTTGA   | 21 | 8  |
| 17  | - | 808 | ACCCTTTTGGTTCATAATCTTT  | 22 | 10 |
| 13  | - | 809 | ACCCTTTTGGTTCATAATCTT   | 21 | 11 |
| 5   | - | 809 | TACCCTTTTGGTTCATAATCTT  | 22 | 11 |
| 3   | - | 814 | CCTCATACCCTTTTGGTTCATA  | 22 | 16 |
| 8   | - | 814 | CTCATACCCTTTTGGTTCATA   | 21 | 16 |
| 5   | - | 815 | TCCTCATACCCTTTTGGTTCAT  | 22 | 17 |
| 8   | - | 816 | TCCTCATACCCTTTTGGTTCA   | 21 | 18 |
| 52  | - | 818 | TATCCTCATACCCTTTTGGTT   | 21 | 20 |
| 13  | - | 819 | TCTATCCTCATACCCTTTTGGT  | 22 | 0  |
| 44  | - | 819 | CTATCCTCATACCCTTTTGGT   | 21 | 0  |
| 4   | - | 820 | CTCTATCCTCATACCCTTTTGG  | 22 | 1  |
| 62  | - | 820 | TCTATCCTCATACCCTTTTGG   | 21 | 1  |
| 5   | - | 822 | CTATCCTCATACCCTTTT      | 18 | 3  |
| 7   | - | 824 | ATGCTCTATCCTCATACCCTT   | 21 | 5  |
| 22  | - | 825 | AATGCTCTATCCTCATACCCT   | 21 | 6  |
| 7   | - | 826 | AAATGCTCTATCCTCATACCC   | 21 | 7  |
| 22  | - | 827 | TAAATGCTCTATCCTCATACC   | 21 | 8  |
| 28  | - | 829 | CCTAAATGCTCTATCCTCATA   | 21 | 10 |
| 40  | - | 830 | TGCCTAAATGCTCTATCCTCAT  | 22 | 11 |
| 5   | - | 830 | GCCTAAATGCTCTATCCTCAT   | 21 | 11 |
| 18  | - | 831 | TGCCTAAATGCTCTATCCTCA   | 21 | 12 |
| 13  | - | 833 | TTGTGCCTAAATGCTCTATCCT  | 22 | 14 |
| 42  | - | 833 | TGTGCCTAAATGCTCTATCCT   | 21 | 14 |
| 39  | - | 834 | TTGTGCCTAAATGCTCTATCC   | 21 | 15 |
| 114 | - | 835 | ATTGTGCCTAAATGCTCTATC   | 21 | 16 |
| 2   | - | 835 | TTATTGTGCCTAAATGCTCTATC | 23 | 16 |
| 10  | - | 836 | TATTGTGCCTAAATGCTCTAT   | 21 | 17 |
| 7   | - | 836 | TTATTGTGCCTAAATGCTCTAT  | 22 | 17 |
| 28  | - | 837 | TTATTGTGCCTAAATGCTCTA   | 21 | 18 |
| 7   | - | 838 | CTTATTGTGCCTAAATGCTCT   | 21 | 19 |
| 3   | - | 839 | TCTTATTGTGCCTAAATGCTC   | 21 | 20 |
| 30  | - | 840 | CTCTTATTGTGCCTAAATGCT   | 21 | 0  |
| 18  | - | 842 | ATCTCTTATTGTGCCTAAATG   | 21 | 2  |
| 41  | - | 843 | TATCTCTTATTGTGCCTAAAT   | 21 | 3  |
| 12  | - | 846 | ACCTATCTCTTATTGTGCCTA   | 21 | 6  |
| 21  | - | 847 | AACCTATCTCTTATTGTGCCT   | 21 | 7  |
| 31  | - | 850 | TGTAACCTATCTCTTATTGTG   | 21 | 10 |
| 18  | - | 853 | TCATGTAACCTATCTCTTATT   | 21 | 13 |
| 13  | - | 855 | TCATGTAACCTATCTCTTA     | 19 | 15 |
| 6   | - | 855 | TGGTCATGTAACCTATCTCTTA  | 22 | 15 |

|     |   |     |                          |    |    |
|-----|---|-----|--------------------------|----|----|
| 27  | - | 856 | TGGTCATGTAACCTATCTCTT    | 21 | 16 |
| 5   | - | 856 | TTGGTCATGTAACCTATCTCTT   | 22 | 16 |
| 23  | - | 857 | TTGGTCATGTAACCTATCTCT    | 21 | 17 |
| 24  | - | 857 | TTTGGTCATGTAACCTATCTCT   | 22 | 17 |
| 1   | - | 862 | ACTTTTTGGTCATGTAACCTA    | 21 | 1  |
| 12  | - | 865 | AGCACTTTTTGGTCATGTAAC    | 21 | 4  |
| 9   | - | 867 | TAAGCACTTTTTGGTCATGTA    | 21 | 6  |
| 10  | - | 868 | ATAAGCACTTTTTGGTCATGT    | 21 | 7  |
| 9   | - | 869 | TGATAAGCACTTTTTGGTCATG   | 22 | 8  |
| 27  | - | 871 | AATGATAAGCACTTTTTGGTCA   | 22 | 10 |
| 4   | - | 871 | ATGATAAGCACTTTTTGGTCA    | 21 | 10 |
| 26  | - | 874 | TAGAATGATAAGCACTTTTTGG   | 22 | 13 |
| 6   | - | 875 | TAGAATGATAAGCACTTTTTG    | 21 | 14 |
| 121 | - | 878 | ATCTAGAATGATAAGCACTTT    | 21 | 17 |
| 1   | - | 878 | TCTAGAATGATAAGCACTTT     | 20 | 17 |
| 2   | - | 879 | ATCTAGAATGATAAGCACTT     | 20 | 18 |
| 16  | - | 888 | TCATTAACATCATCTAGAATGA   | 22 | 6  |
| 5   | - | 889 | TCATTAACATCATCTAGAATG    | 21 | 7  |
| 12  | - | 892 | GAGATCATTAACATCATCTAGA   | 22 | 10 |
| 14  | - | 892 | AGATCATTAACATCATCTAGA    | 21 | 10 |
| 8   | - | 893 | GAGATCATTAACATCATCTAG    | 21 | 11 |
| 10  | - | 894 | CGAGATCATTAACATCATCTA    | 21 | 12 |
| 1   | - | 895 | CGAGATCATTAACATCATCT     | 20 | 13 |
| 42  | - | 895 | TCGAGATCATTAACATCATCT    | 21 | 13 |
| 22  | - | 896 | ATCGAGATCATTAACATCATC    | 21 | 14 |
| 12  | - | 897 | AATCGAGATCATTAACATCAT    | 21 | 15 |
| 2   | - | 898 | AAATCGAGATCATTAACATCA    | 21 | 16 |
| 3   | - | 899 | CAAATCGAGATCATTAACATC    | 21 | 17 |
| 4   | - | 900 | ACAAATCGAGATCATTAACAT    | 21 | 18 |
| 12  | - | 901 | TACAAATCGAGATCATTAACA    | 21 | 19 |
| 182 | - | 901 | ATACAAATCGAGATCATTAACA   | 22 | 19 |
| 18  | - | 902 | ATACAAATCGAGATCATTAAC    | 21 | 20 |
| 3   | - | 905 | AAGCATACAAATCGAGATCATT   | 22 | 2  |
| 5   | - | 906 | AAAGCATACAAATCGAGATCAT   | 22 | 3  |
| 4   | - | 907 | AAAGCATACAAATCGAGATCA    | 21 | 4  |
| 1   | - | 908 | AGCCAAAGCATACAAATCGAGATC | 24 | 5  |
| 4   | - | 908 | CCAAAGCATACAAATCGAGATC   | 22 | 5  |
| 1   | - | 910 | CCAAAGCATACAAATCGAGA     | 20 | 7  |
| 41  | - | 910 | GCCAAAGCATACAAATCGAGA    | 21 | 7  |
| 326 | - | 911 | AGCCAAAGCATACAAATCGAG    | 21 | 8  |
| 3   | - | 911 | ATCAGCCAAAGCATACAAATCGAG | 24 | 8  |
| 7   | - | 911 | CAGCCAAAGCATACAAATCGAG   | 22 | 8  |
| 23  | - | 912 | CAGCCAAAGCATACAAATCGA    | 21 | 9  |
| 9   | - | 912 | TCAGCCAAAGCATACAAATCGA   | 22 | 9  |

|     |   |     |                               |    |    |
|-----|---|-----|-------------------------------|----|----|
| 19  | - | 913 | TCAGCCAAAGCATACAAATCG         | 21 | 10 |
| 3   | - | 913 | ATCAGCCAAAGCATACAAATCG        | 22 | 10 |
| 22  | - | 914 | ATCAGCCAAAGCATACAAATC         | 21 | 11 |
| 1   | - | 916 | TGATCAGCCAAAGCATAAAA          | 21 | 13 |
| 13  | - | 917 | CTGATCAGCCAAAGCATACAA         | 21 | 14 |
| 114 | - | 918 | TCTGATCAGCCAAAGCATACA         | 21 | 15 |
| 1   | - | 918 | CTGATCAGCCAAAGCATACA          | 20 | 15 |
| 2   | - | 918 | CCACGTTGTCTGATCAGCCAAAGCATACA | 29 | 15 |
| 42  | - | 920 | TGTCTGATCAGCCAAAGCATA         | 21 | 17 |
| 5   | - | 920 | TTGTCTGATCAGCCAAAGCATA        | 22 | 17 |
| 9   | - | 921 | TGTCTGATCAGCCAAAGCAT          | 20 | 18 |
| 8   | - | 922 | TTGTCTGATCAGCCAAAGCA          | 20 | 19 |
| 11  | - | 923 | CGTTGTCTGATCAGCCAAAGC         | 21 | 20 |
| 4   | - | 924 | TTGTCTGATCAGCCAAAG            | 18 | 0  |
| 39  | - | 926 | CCACGTTGTCTGATCAGCCAA         | 21 | 2  |
| 5   | - | 926 | ACCACGTTGTCTGATCAGCCAA        | 22 | 2  |
| 32  | - | 927 | ACCACGTTGTCTGATCAGCCA         | 21 | 3  |
| 62  | - | 927 | AACCACGTTGTCTGATCAGCCA        | 22 | 3  |
| 6   | - | 927 | CCACGTTGTCTGATCAGCCA          | 20 | 3  |
| 7   | - | 927 | AAACCACGTTGTCTGATCAGCCA       | 23 | 3  |
| 23  | - | 928 | CCACGTTGTCTGATCAGCC           | 19 | 4  |
| 33  | - | 928 | AAACCACGTTGTCTGATCAGCC        | 22 | 4  |
| 3   | - | 928 | CACGTTGTCTGATCAGCC            | 18 | 4  |
| 562 | - | 928 | AACCACGTTGTCTGATCAGCC         | 21 | 4  |
| 13  | - | 929 | CAAACCACGTTGTCTGATCAGC        | 22 | 5  |
| 158 | - | 929 | AAACCACGTTGTCTGATCAGC         | 21 | 5  |
| 5   | - | 930 | AACCACGTTGTCTGATCAG           | 19 | 6  |
| 16  | - | 933 | GACCAAACCACGTTGTCTGAT         | 21 | 9  |
| 222 | - | 934 | GGACCAAACCACGTTGTCTGA         | 21 | 10 |
| 7   | - | 934 | AGGACCAAACCACGTTGTCTGA        | 22 | 10 |
| 15  | - | 935 | AGGACCAAACCACGTTGTCTG         | 21 | 11 |
| 20  | - | 936 | CAGGACCAAACCACGTTGTCT         | 21 | 12 |
| 130 | - | 937 | TCCAGGACCAAACCACGTTGTC        | 22 | 13 |
| 217 | - | 937 | CCAGGACCAAACCACGTTGTC         | 21 | 13 |
| 5   | - | 937 | ACTTCCAGGACCAAACCACGTTGTC     | 25 | 13 |
| 320 | - | 938 | TTCCAGGACCAAACCACGTTGT        | 22 | 14 |
| 4   | - | 938 | CCAGGACCAAACCACGTTGT          | 20 | 14 |
| 50  | - | 938 | ACTTCCAGGACCAAACCACGTTGT      | 24 | 14 |
| 544 | - | 938 | TCCAGGACCAAACCACGTTGT         | 21 | 14 |
| 115 | - | 939 | TTCCAGGACCAAACCACGTTG         | 21 | 15 |
| 15  | - | 940 | ACTTCCAGGACCAAACCACGTT        | 22 | 16 |
| 218 | - | 940 | CTTCCAGGACCAAACCACGTT         | 21 | 16 |
| 10  | - | 952 | ACGATAATCCTACTTCCAGGA         | 21 | 7  |
| 13  | - | 953 | TCACGATAATCCTACTTCCAGG        | 22 | 8  |

|      |   |     |                          |    |    |
|------|---|-----|--------------------------|----|----|
| 17   | - | 953 | CACGATAATCCTACTTCCAGG    | 21 | 8  |
| 20   | - | 954 | TCACGATAATCCTACTTCCAG    | 21 | 9  |
| 18   | - | 955 | GTCACGATAATCCTACTTCCA    | 21 | 10 |
| 8    | - | 955 | TCACGATAATCCTACTTCCA     | 20 | 10 |
| 27   | - | 956 | TTGTCACGATAATCCTACTTCC   | 22 | 11 |
| 8    | - | 956 | TGTCACGATAATCCTACTTCC    | 21 | 11 |
| 31   | - | 957 | TTGTCACGATAATCCTACTTC    | 21 | 12 |
| 27   | - | 958 | TGTTGTCACGATAATCCTACTT   | 22 | 13 |
| 31   | - | 959 | TGTTGTCACGATAATCCTACT    | 21 | 14 |
| 126  | - | 960 | CTGTTGTCACGATAATCCTAC    | 21 | 15 |
| 2    | - | 960 | TCTGTTGTCACGATAATCCTAC   | 22 | 15 |
| 42   | - | 961 | TCTGTTGTCACGATAATCCTA    | 21 | 16 |
| 41   | - | 962 | TTCTGTTGTCACGATAATCCT    | 21 | 17 |
| 11   | - | 963 | CTTCTGTTGTCACGATAATCC    | 21 | 18 |
| 27   | - | 963 | TGTCTTCTGTTGTCACGATAATCC | 24 | 18 |
| 80   | - | 964 | TCTTCTGTTGTCACGATAATC    | 21 | 19 |
| 1    | - | 966 | TTGTCTTCTGTTGTCACGATAA   | 22 | 0  |
| 2    | - | 966 | TGTCTTCTGTTGTCACGATAA    | 21 | 0  |
| 512  | - | 967 | TTGTCTTCTGTTGTCACGATA    | 21 | 1  |
| 18   | - | 968 | GTTGTCTTCTGTTGTCACGAT    | 21 | 2  |
| 37   | - | 969 | CGTTGTCTTCTGTTGTCACGA    | 21 | 3  |
| 381  | - | 970 | TCGTTGTCTTCTGTTGTCACG    | 21 | 4  |
| 185  | - | 971 | CTCGTTGTCTTCTGTTGTCAC    | 21 | 5  |
| 1    | - | 972 | AAGCTCGTTGTCTTCTGTTGTCA  | 23 | 6  |
| 2    | - | 972 | CTCGTTGTCTTCTGTTGTCA     | 20 | 6  |
| 106  | - | 973 | AGCTCGTTGTCTTCTGTTGTC    | 21 | 7  |
| 81   | - | 973 | AAGCTCGTTGTCTTCTGTTGTC   | 22 | 7  |
| 22   | - | 974 | AAAGCTCGTTGTCTTCTGTTGT   | 22 | 8  |
| 81   | - | 974 | AAGCTCGTTGTCTTCTGTTGT    | 21 | 8  |
| 40   | - | 975 | AAAGCTCGTTGTCTTCTGTTG    | 21 | 9  |
| 228  | - | 976 | AAAAGCTCGTTGTCTTCTGTT    | 21 | 10 |
| 4    | - | 976 | CAAAAGCTCGTTGTCTTCTGTT   | 22 | 10 |
| 18   | - | 977 | CAAAAGCTCGTTGTCTTCTGT    | 21 | 11 |
| 5    | - | 977 | GCAAAAGCTCGTTGTCTTCTGT   | 22 | 11 |
| 186  | - | 978 | GCAAAAGCTCGTTGTCTTCTG    | 21 | 12 |
| 388  | - | 978 | TGCAAAAGCTCGTTGTCTTCTG   | 22 | 12 |
| 144  | - | 979 | TGCAAAAGCTCGTTGTCTTCT    | 21 | 13 |
| 11   | - | 980 | CTGCAAAAGCTCGTTGTCTTC    | 21 | 14 |
| 1343 | - | 981 | TCTGCAAAAGCTCGTTGTCTT    | 21 | 15 |
| 1    | - | 981 | CTGCAAAAGCTCGTTGTCTT     | 20 | 15 |
| 52   | - | 981 | TTCTGCAAAAGCTCGTTGTCTT   | 22 | 15 |
| 5    | - | 981 | TGCAAAAGCTCGTTGTCTT      | 19 | 15 |
| 28   | - | 982 | TTCTGCAAAAGCTCGTTGTCT    | 21 | 16 |
| 58   | - | 982 | TTTCTGCAAAAGCTCGTTGTCT   | 22 | 16 |

|     |   |      |                          |    |    |
|-----|---|------|--------------------------|----|----|
| 356 | - | 983  | TTTCTGCAAAAGCTCGTTGTC    | 21 | 17 |
| 5   | - | 983  | TTCTGCAAAAGCTCGTTGTC     | 20 | 17 |
| 7   | - | 983  | TCTGCAAAAGCTCGTTGTC      | 19 | 17 |
| 36  | - | 984  | GTTTCTGCAAAAGCTCGTTGT    | 21 | 18 |
| 38  | - | 984  | TGTTTCTGCAAAAGCTCGTTGT   | 22 | 18 |
| 9   | - | 984  | TTTCTGCAAAAGCTCGTTGT     | 20 | 18 |
| 26  | - | 985  | TGTTTCTGCAAAAGCTCGTTG    | 21 | 19 |
| 12  | - | 986  | CATGTTTCTGCAAAAGCTCGTT   | 22 | 20 |
| 24  | - | 986  | ATGTTTCTGCAAAAGCTCGTT    | 21 | 20 |
| 25  | - | 987  | CATGTTTCTGCAAAAGCTCGT    | 21 | 0  |
| 11  | - | 988  | TCATGTTTCTGCAAAAGCTCG    | 21 | 1  |
| 181 | - | 989  | TATCATGTTTCTGCAAAAGCTC   | 22 | 2  |
| 38  | - | 989  | ATCATGTTTCTGCAAAAGCTC    | 21 | 2  |
| 101 | - | 990  | TATCATGTTTCTGCAAAAGCT    | 21 | 3  |
| 1   | - | 990  | AATATCATGTTTCTGCAAAAGCT  | 23 | 3  |
| 11  | - | 991  | ATATCATGTTTCTGCAAAAGC    | 21 | 4  |
| 1   | - | 992  | AATATCATGTTTCTGCAAAAG    | 21 | 5  |
| 8   | - | 993  | TTAATATCATGTTTCTGCAAAA   | 22 | 6  |
| 13  | - | 994  | TTAATATCATGTTTCTGCAAAA   | 21 | 7  |
| 7   | - | 994  | AATATCATGTTTCTGCAAAA     | 19 | 7  |
| 14  | - | 995  | GTTAATATCATGTTTCTGCAA    | 21 | 8  |
| 1   | - | 996  | TGTTAATATCATGTTTCTGCA    | 21 | 9  |
| 3   | - | 996  | TTGTTAATATCATGTTTCTGCA   | 22 | 9  |
| 5   | - | 997  | TTGTTAATATCATGTTTCTGC    | 21 | 10 |
| 2   | - | 1003 | GTAGACATTGTTAATATCATGT   | 22 | 16 |
| 9   | - | 1003 | TAGACATTGTTAATATCATGT    | 21 | 16 |
| 9   | - | 1006 | TGGTAGACATTGTTAATATCA    | 21 | 19 |
| 36  | - | 1007 | ATGGTAGACATTGTTAATATC    | 21 | 20 |
| 86  | - | 1009 | ACATGGTAGACATTGTTAATA    | 21 | 1  |
| 28  | - | 1010 | CACATGGTAGACATTGTTAAT    | 21 | 2  |
| 5   | - | 1012 | TCCACATGGTAGACATTGTTA    | 21 | 4  |
| 41  | - | 1013 | ATCCACATGGTAGACATTGTT    | 21 | 5  |
| 44  | - | 1015 | AAATCCACATGGTAGACATTG    | 21 | 7  |
| 36  | - | 1016 | AAAATCCACATGGTAGACATT    | 21 | 8  |
| 12  | - | 1017 | GAAAATCCACATGGTAGACAT    | 21 | 9  |
| 45  | - | 1018 | TGGAAAATCCACATGGTAGACA   | 22 | 10 |
| 4   | - | 1018 | GGAAAATCCACATGGTAGACA    | 21 | 10 |
| 16  | - | 1019 | TGGAAAATCCACATGGTAGAC    | 21 | 11 |
| 8   | - | 1019 | AGATGGAAAATCCACATGGTAGAC | 24 | 11 |
| 28  | - | 1022 | AGATGGAAAATCCACATGGTA    | 21 | 14 |
| 5   | - | 1022 | TAGATGGAAAATCCACATGGTA   | 22 | 14 |
| 36  | - | 1023 | TAGATGGAAAATCCACATGGT    | 21 | 15 |
| 4   | - | 1023 | CTAGATGGAAAATCCACATGGT   | 22 | 15 |
| 11  | - | 1024 | TCTAGATGGAAAATCCACATGG   | 22 | 16 |

|     |   |      |                          |    |    |
|-----|---|------|--------------------------|----|----|
| 4   | - | 1025 | TCTAGATGGAAAATCCACATG    | 21 | 17 |
| 9   | - | 1025 | TTCTAGATGGAAAATCCACATG   | 22 | 17 |
| 28  | - | 1034 | AGCTTCTTTTCTAGATGGAAA    | 21 | 5  |
| 5   | - | 1035 | GAGCTTCTTTTCTAGATGGAA    | 21 | 6  |
| 22  | - | 1036 | AGAGCTTCTTTTCTAGATGGA    | 21 | 7  |
| 33  | - | 1037 | AAGAGCTTCTTTTCTAGATGG    | 21 | 8  |
| 4   | - | 1038 | TCAAGAGCTTCTTTTCTAGATG   | 22 | 9  |
| 15  | - | 1039 | TCAAGAGCTTCTTTTCTAGAT    | 21 | 10 |
| 2   | - | 1040 | CTCAAGAGCTTCTTTTCTAGA    | 21 | 11 |
| 61  | - | 1040 | TCTCAAGAGCTTCTTTTCTAGA   | 22 | 11 |
| 38  | - | 1042 | ATCTCAAGAGCTTCTTTTCTA    | 21 | 13 |
| 4   | - | 1045 | AAGATCTCAAGAGCTTCTTTT    | 21 | 16 |
| 12  | - | 1049 | TGCAAAAGATCTCAAGAGCTTC   | 22 | 20 |
| 9   | - | 1049 | GCAAAAGATCTCAAGAGCTTC    | 21 | 20 |
| 159 | - | 1050 | TGCAAAAGATCTCAAGAGCTT    | 21 | 0  |
| 17  | - | 1050 | CTGCAAAAGATCTCAAGAGCTT   | 22 | 0  |
| 3   | - | 1050 | TCTGCAAAAGATCTCAAGAGCTT  | 23 | 0  |
| 117 | - | 1051 | CTGCAAAAGATCTCAAGAGCT    | 21 | 1  |
| 29  | - | 1051 | TCTGCAAAAGATCTCAAGAGCT   | 22 | 1  |
| 10  | - | 1052 | TGCAAAAGATCTCAAGAGC      | 19 | 2  |
| 32  | - | 1052 | TCTGCAAAAGATCTCAAGAGC    | 21 | 2  |
| 7   | - | 1053 | ATCTGCAAAAGATCTCAAGAG    | 21 | 3  |
| 1   | - | 1058 | AAAAGCACATCTGCAAAAGATCTC | 24 | 8  |
| 4   | - | 1058 | AGCACATCTGCAAAAGATCTC    | 21 | 8  |
| 15  | - | 1061 | TAAAAGCACATCTGCAAAAGAT   | 22 | 11 |
| 5   | - | 1061 | AAAAGCACATCTGCAAAAGAT    | 21 | 11 |
| 18  | - | 1062 | TAAAAGCACATCTGCAAAAGA    | 21 | 12 |
| 1   | - | 1062 | GTCTAAAAGCACATCTGCAAAAGA | 24 | 12 |
| 10  | - | 1067 | TTGTCTAAAAGCACATCTGCA    | 21 | 17 |
| 19  | - | 1067 | TTTGTCTAAAAGCACATCTGCA   | 22 | 17 |
| 23  | - | 1068 | TTTGTCTAAAAGCACATCTGC    | 21 | 18 |
| 8   | - | 1078 | AGGTGCAGAGCTTTGTCTAAA    | 22 | 7  |
| 59  | - | 1079 | AGGTGCAGAGCTTTGTCTAAA    | 21 | 8  |
| 116 | - | 1081 | TCAGGTGCAGAGCTTTGTCTA    | 21 | 10 |
| 17  | - | 1081 | ATCAGGTGCAGAGCTTTGTCTA   | 22 | 10 |
| 58  | - | 1082 | ATCAGGTGCAGAGCTTTGTCT    | 21 | 11 |
| 57  | - | 1083 | TATCAGGTGCAGAGCTTTGTC    | 21 | 12 |
| 32  | - | 1086 | TCGTATCAGGTGCAGAGCTTT    | 21 | 15 |
| 130 | - | 1087 | ATCGTATCAGGTGCAGAGCTT    | 21 | 16 |
| 146 | - | 1087 | AATCGTATCAGGTGCAGAGCTT   | 22 | 16 |
| 74  | - | 1088 | AATCGTATCAGGTGCAGAGCT    | 21 | 17 |
| 39  | - | 1089 | AGAATCGTATCAGGTGCAGAGC   | 22 | 18 |
| 39  | - | 1089 | TTAGAATCGTATCAGGTGCAGAGC | 24 | 18 |
| 27  | - | 1090 | TAGAATCGTATCAGGTGCAGAG   | 22 | 19 |

|      |   |      |                              |    |    |
|------|---|------|------------------------------|----|----|
| 12   | - | 1091 | ATCGTATCAGGTGCAGA            | 17 | 20 |
| 151  | - | 1091 | TTAGAATCGTATCAGGTGCAGA       | 22 | 20 |
| 1    | - | 1091 | AATCGTATCAGGTGCAGA           | 18 | 20 |
| 41   | - | 1091 | TAGAATCGTATCAGGTGCAGA        | 21 | 20 |
| 11   | - | 1092 | CTTTAGAATCGTATCAGGTGCAG      | 23 | 0  |
| 161  | - | 1092 | TTAGAATCGTATCAGGTGCAG        | 21 | 0  |
| 1    | - | 1092 | TAGAATCGTATCAGGTGCAG         | 20 | 0  |
| 8    | - | 1092 | TTTAGAATCGTATCAGGTGCAG       | 22 | 0  |
| 1    | - | 1093 | CTTTAGAATCGTATCAGGTGCA       | 22 | 1  |
| 313  | - | 1093 | TTTAGAATCGTATCAGGTGCA        | 21 | 1  |
| 18   | - | 1094 | AAGCTTTAGAATCGTATCAGGTGC     | 24 | 2  |
| 3    | - | 1094 | CTGCAAGCTTTAGAATCGTATCAGGTGC | 28 | 2  |
| 3    | - | 1094 | GCTTTAGAATCGTATCAGGTGC       | 22 | 2  |
| 50   | - | 1094 | TTTAGAATCGTATCAGGTGC         | 20 | 2  |
| 589  | - | 1094 | CTTTAGAATCGTATCAGGTGC        | 21 | 2  |
| 28   | - | 1095 | GCTTTAGAATCGTATCAGGTG        | 21 | 3  |
| 65   | - | 1095 | AGCTTTAGAATCGTATCAGGTG       | 22 | 3  |
| 6    | - | 1095 | AAGCTTTAGAATCGTATCAGGTG      | 23 | 3  |
| 15   | - | 1096 | GCTTTAGAATCGTATCAGGT         | 20 | 4  |
| 1    | - | 1096 | AAGCTTTAGAATCGTATCAGGT       | 22 | 4  |
| 59   | - | 1096 | AGCTTTAGAATCGTATCAGGT        | 21 | 4  |
| 1448 | - | 1097 | AAGCTTTAGAATCGTATCAGG        | 21 | 5  |
| 184  | - | 1097 | CAAGCTTTAGAATCGTATCAGG       | 22 | 5  |
| 2    | - | 1097 | AGCTTTAGAATCGTATCAGG         | 20 | 5  |
| 7    | - | 1097 | GCAAGCTTTAGAATCGTATCAGG      | 23 | 5  |
| 2    | - | 1098 | GCAAGCTTTAGAATCGTATCAG       | 22 | 6  |
| 48   | - | 1098 | CAAGCTTTAGAATCGTATCAG        | 21 | 6  |
| 2    | - | 1099 | GCAAGCTTTAGAATCGTATCA        | 21 | 7  |
| 1    | - | 1100 | GCAAGCTTTAGAATCGTATC         | 20 | 8  |
| 240  | - | 1100 | TGCAAGCTTTAGAATCGTATC        | 21 | 8  |
| 228  | - | 1102 | TCTGCAAGCTTTAGAATCGTA        | 21 | 10 |
| 75   | - | 1102 | TTCTGCAAGCTTTAGAATCGTA       | 22 | 10 |
| 24   | - | 1103 | TTCTGCAAGCTTTAGAATCGT        | 21 | 11 |
| 305  | - | 1105 | TCGTTCTGCAAGCTTTAGAATC       | 22 | 13 |
| 93   | - | 1106 | TCGTTCTGCAAGCTTTAGAAT        | 21 | 14 |
| 19   | - | 1107 | ACTCGTTCTGCAAGCTTTAGAA       | 22 | 15 |
| 1    | - | 1107 | TCGTTCTGCAAGCTTTAGAA         | 20 | 15 |
| 49   | - | 1107 | CTCGTTCTGCAAGCTTTAGAA        | 21 | 15 |
| 673  | - | 1108 | ACTCGTTCTGCAAGCTTTAGA        | 21 | 16 |
| 47   | - | 1109 | TACTCGTTCTGCAAGCTTTAG        | 21 | 17 |
| 5    | - | 1109 | TTACTCGTTCTGCAAGCTTTAG       | 22 | 17 |
| 6    | - | 1109 | GTTACTCGTTCTGCAAGCTTTAG      | 23 | 17 |
| 56   | - | 1110 | TTACTCGTTCTGCAAGCTTTA        | 21 | 18 |
| 101  | - | 1111 | GTTACTCGTTCTGCAAGCTTT        | 21 | 19 |

|     |   |      |                          |    |    |
|-----|---|------|--------------------------|----|----|
| 2   | - | 1112 | TGTTACTCGTTCTGCAAGCTT    | 21 | 20 |
| 166 | - | 1113 | CTGTTACTCGTTCTGCAAGCT    | 21 | 0  |
| 4   | - | 1113 | TCTGTTACTCGTTCTGCAAGCT   | 22 | 0  |
| 173 | - | 1114 | TCTGTTACTCGTTCTGCAAGC    | 21 | 1  |
| 12  | - | 1115 | TCTGTTACTCGTTCTGCAAG     | 20 | 2  |
| 63  | - | 1115 | CTCTGTTACTCGTTCTGCAAG    | 21 | 2  |
| 6   | - | 1115 | AAGCTCTGTTACTCGTTCTGCAAG | 24 | 2  |
| 13  | - | 1116 | AAGCTCTGTTACTCGTTCTGCAA  | 23 | 3  |
| 24  | - | 1116 | GCTCTGTTACTCGTTCTGCAA    | 21 | 3  |
| 1   | - | 1117 | GCTCTGTTACTCGTTCTGCA     | 20 | 4  |
| 377 | - | 1117 | AGCTCTGTTACTCGTTCTGCA    | 21 | 4  |
| 59  | - | 1117 | AAGCTCTGTTACTCGTTCTGCA   | 22 | 4  |
| 14  | - | 1118 | AAAGCTCTGTTACTCGTTCTGC   | 22 | 5  |
| 416 | - | 1118 | AAGCTCTGTTACTCGTTCTGC    | 21 | 5  |
| 88  | - | 1119 | AAAGCTCTGTTACTCGTTCTG    | 21 | 6  |
| 25  | - | 1121 | ACAAAGCTCTGTTACTCGTTC    | 21 | 8  |
| 18  | - | 1122 | AAGCTCTGTTACTCGTT        | 17 | 9  |
| 2   | - | 1122 | CACAAAGCTCTGTTACTCGTT    | 21 | 9  |
| 8   | - | 1122 | CCACAAAGCTCTGTTACTCGTT   | 22 | 9  |
| 75  | - | 1123 | CCACAAAGCTCTGTTACTCGT    | 21 | 10 |
| 15  | - | 1124 | ACCACAAAGCTCTGTTACTCG    | 21 | 11 |
| 8   | - | 1124 | TACCACAAAGCTCTGTTACTCG   | 22 | 11 |
| 110 | - | 1125 | TTACCACAAAGCTCTGTTACTC   | 22 | 12 |
| 83  | - | 1125 | TACCACAAAGCTCTGTTACTC    | 21 | 12 |
| 226 | - | 1126 | TTACCACAAAGCTCTGTTACT    | 21 | 13 |
| 30  | - | 1126 | ATTACCACAAAGCTCTGTTACT   | 22 | 13 |
| 52  | - | 1127 | ATTACCACAAAGCTCTGTTAC    | 21 | 14 |
| 5   | - | 1127 | GATTACCACAAAGCTCTGTTAC   | 22 | 14 |
| 1   | - | 1128 | AGATTACCACAAAGCTCTGTTA   | 22 | 15 |
| 124 | - | 1129 | AGATTACCACAAAGCTCTGTT    | 21 | 16 |
| 13  | - | 1129 | AAGATTACCACAAAGCTCTGTT   | 22 | 16 |
| 25  | - | 1130 | AAGATTACCACAAAGCTCTGT    | 21 | 17 |
| 4   | - | 1132 | GGAAGATTACCACAAAGCTCT    | 21 | 19 |
| 1   | - | 1133 | TGGAAGATTACCACAAAGCTC    | 21 | 20 |
| 2   | - | 1134 | GAAGATTACCACAAAGCT       | 18 | 0  |
| 67  | - | 1134 | ATGGAAGATTACCACAAAGCT    | 21 | 0  |
| 7   | - | 1135 | AATGGAAGATTACCACAAAGC    | 21 | 1  |
| 9   | - | 1135 | CAATGGAAGATTACCACAAAGC   | 22 | 1  |
| 13  | - | 1136 | CAATGGAAGATTACCACAAAG    | 21 | 2  |
| 4   | - | 1143 | CACAGAGACCCAATGGAAGATTAC | 24 | 9  |
| 1   | - | 1145 | ACAGAGACCCAATGGAAGATT    | 21 | 11 |
| 6   | - | 1145 | CACAGAGACCCAATGGAAGATT   | 22 | 11 |
| 39  | - | 1146 | CACAGAGACCCAATGGAAGAT    | 21 | 12 |
| 217 | - | 1147 | ACACAGAGACCCAATGGAAGA    | 21 | 13 |



|     |   |      |                            |    |    |
|-----|---|------|----------------------------|----|----|
| 2   | - | 1147 | CTATGACACAGAGACCCAATGGAAGA | 26 | 13 |
| 5   | - | 1147 | TGACACAGAGACCCAATGGAAGA    | 23 | 13 |
| 32  | - | 1148 | TGACACAGAGACCCAATGGAAG     | 22 | 14 |
| 4   | - | 1148 | GACACAGAGACCCAATGGAAG      | 21 | 14 |
| 326 | - | 1149 | TGACACAGAGACCCAATGGAA      | 21 | 15 |
| 47  | - | 1149 | ATGACACAGAGACCCAATGGAA     | 22 | 15 |
| 17  | - | 1150 | TATGACACAGAGACCCAATGGA     | 22 | 16 |
| 2   | - | 1150 | CTATGACACAGAGACCCAATGGA    | 23 | 16 |
| 423 | - | 1150 | ATGACACAGAGACCCAATGGA      | 21 | 16 |
| 33  | - | 1151 | TATGACACAGAGACCCAATGG      | 21 | 17 |
| 4   | - | 1156 | GAACCTATGACACAGAGACCC      | 21 | 1  |
| 9   | - | 1157 | TGAACCTATGACACAGAGACC      | 21 | 2  |
| 13  | - | 1158 | GATGAACCTATGACACAGAGAC     | 22 | 3  |
| 15  | - | 1158 | AAGATGAACCTATGACACAGAGAC   | 24 | 3  |
| 22  | - | 1158 | ATGAACCTATGACACAGAGAC      | 21 | 3  |
| 3   | - | 1159 | AGATGAACCTATGACACAGAGA     | 22 | 4  |
| 60  | - | 1159 | GATGAACCTATGACACAGAGA      | 21 | 4  |
| 104 | - | 1160 | AGATGAACCTATGACACAGAG      | 21 | 5  |
| 559 | - | 1161 | AAGATGAACCTATGACACAGA      | 21 | 6  |
| 8   | - | 1161 | AGATGAACCTATGACACAGA       | 20 | 6  |
| 96  | - | 1161 | AAAGATGAACCTATGACACAGA     | 22 | 6  |
| 8   | - | 1162 | AAAGATGAACCTATGACACAG      | 21 | 7  |
| 40  | - | 1163 | TAAAGATGAACCTATGACACA      | 21 | 8  |
| 52  | - | 1165 | TGTAAGATGAACCTATGACA       | 21 | 10 |
| 49  | - | 1166 | GTGTAAGATGAACCTATGAC       | 21 | 11 |
| 36  | - | 1168 | CCGTGTAAGATGAACCTATG       | 21 | 13 |
| 5   | - | 1168 | CCCGTGTAAGATGAACCTATG      | 22 | 13 |
| 3   | - | 1169 | CCCGTGTAAGATGAACCTAT       | 21 | 14 |
| 24  | - | 1170 | TTCCCGTGTAAGATGAACCTA      | 22 | 15 |
| 8   | - | 1170 | TCCCGTGTAAGATGAACCTA       | 21 | 15 |
| 30  | - | 1171 | TTTCCCGTGTAAGATGAACCT      | 22 | 16 |
| 78  | - | 1171 | TTCCCGTGTAAGATGAACCT       | 21 | 16 |
| 102 | - | 1172 | TTTCCCGTGTAAGATGAACC       | 21 | 17 |
| 48  | - | 1173 | TTTTCCCGTGTAAGATGAAC       | 21 | 18 |
| 105 | - | 1174 | GTTTTCCCGTGTAAGATGAA       | 21 | 19 |
| 5   | - | 1175 | AGTTTTCCCGTGTAAGATGA       | 21 | 20 |
| 7   | - | 1175 | CAGTTTTCCCGTGTAAGATGA      | 22 | 20 |
| 1   | - | 1177 | CTCAGTTTTCCCGTGTAAGAT      | 22 | 1  |
| 4   | - | 1177 | TCAGTTTTCCCGTGTAAGAT       | 21 | 1  |
| 15  | - | 1178 | CCTCAGTTTTCCCGTGTAAGA      | 22 | 2  |
| 50  | - | 1178 | CTCAGTTTTCCCGTGTAAGA       | 21 | 2  |
| 11  | - | 1180 | TCCTCAGTTTTCCCGTGAAA       | 21 | 4  |
| 3   | - | 1181 | ATCCTCAGTTTTCCCGTGAA       | 21 | 5  |
| 3   | - | 1181 | CATCCTCAGTTTTCCCGTGAA      | 22 | 5  |

|     |   |      |                          |    |    |
|-----|---|------|--------------------------|----|----|
| 127 | - | 1182 | CATCCTCAGTTTTCCCGTGTA    | 21 | 6  |
| 137 | - | 1182 | TCATCCTCAGTTTTCCCGTGTA   | 22 | 6  |
| 7   | - | 1182 | CTCAGTTTTCCCGTGTA        | 17 | 6  |
| 10  | - | 1183 | TCATCCTCAGTTTTCCCGTGT    | 21 | 7  |
| 47  | - | 1183 | CTCATCCTCAGTTTTCCCGTGT   | 22 | 7  |
| 18  | - | 1184 | CTCATCCTCAGTTTTCCCGTG    | 21 | 8  |
| 7   | - | 1184 | ACTCATCCTCAGTTTTCCCGTG   | 22 | 8  |
| 26  | - | 1186 | CACTCATCCTCAGTTTTCCCG    | 21 | 10 |
| 79  | - | 1191 | TTTCCCCTCATCCTCAGTTT     | 21 | 15 |
| 26  | - | 1192 | ATTTCCCCTCATCCTCAGTT     | 21 | 16 |
| 6   | - | 1192 | AATTTCCCCTCATCCTCAGTT    | 22 | 16 |
| 65  | - | 1193 | AATTTCCCCTCATCCTCAGT     | 21 | 17 |
| 6   | - | 1196 | AATTTAAAATTTCCCCTCATCCTC | 24 | 20 |
| 9   | - | 1196 | TAAAATTTCCCCTCATCCTC     | 21 | 20 |
| 24  | - | 1197 | TTAAAATTTCCCCTCATCCT     | 21 | 0  |
| 4   | - | 1197 | ATTTAAAATTTCCCCTCATCCT   | 22 | 0  |
| 12  | - | 1198 | ATTTAAAATTTCCCCTCATCC    | 21 | 1  |
| 1   | - | 1199 | AATTTAAAATTTCCCCTCATC    | 21 | 2  |
| 4   | - | 1205 | TCTGCGAATTTAAAATTTCCA    | 21 | 8  |
| 3   | - | 1208 | CTAGTCTGCGAATTTAAAATTTTC | 22 | 11 |
| 5   | - | 1208 | TAGTCTGCGAATTTAAAATTTTC  | 21 | 11 |
| 11  | - | 1209 | CTAGTCTGCGAATTTAAAATTT   | 21 | 12 |
| 7   | - | 1210 | TCTAGTCTGCGAATTTAAAATT   | 21 | 13 |
| 29  | - | 1211 | TTCTAGTCTGCGAATTTAAAAT   | 21 | 14 |
| 1   | - | 1212 | ATTTCTAGTCTGCGAATTTAAA   | 22 | 15 |
| 44  | - | 1212 | TTTCTAGTCTGCGAATTTAAA    | 21 | 15 |
| 17  | - | 1213 | ATTTCTAGTCTGCGAATTTAAA   | 21 | 16 |
| 6   | - | 1213 | AATTTCTAGTCTGCGAATTTAAA  | 22 | 16 |
| 118 | - | 1216 | CTAATTTCTAGTCTGCGAATT    | 21 | 19 |
| 27  | - | 1228 | TCTCGATCAAGACTAATTTCT    | 21 | 10 |
| 4   | - | 1228 | ATCTCGATCAAGACTAATTTCT   | 22 | 10 |
| 20  | - | 1230 | TTATCTCGATCAAGACTAATTT   | 22 | 12 |
| 42  | - | 1230 | TATCTCGATCAAGACTAATTT    | 21 | 12 |
| 53  | - | 1231 | TTATCTCGATCAAGACTAATT    | 21 | 13 |
| 106 | - | 1233 | TCGTTATCTCGATCAAGACTAA   | 22 | 15 |
| 19  | - | 1234 | CGTTATCTCGATCAAGACTA     | 20 | 16 |
| 41  | - | 1234 | TCGTTATCTCGATCAAGACTA    | 21 | 16 |
| 22  | - | 1235 | CTCGTTATCTCGATCAAGACT    | 21 | 17 |
| 25  | - | 1235 | CCTCGTTATCTCGATCAAGACT   | 22 | 17 |
| 17  | - | 1236 | CCTCGTTATCTCGATCAAGAC    | 21 | 18 |
| 34  | - | 1237 | TGCCTCGTTATCTCGATCAAGA   | 22 | 19 |
| 32  | - | 1238 | TGCCTCGTTATCTCGATCAAG    | 21 | 20 |
| 5   | - | 1238 | GTGCCTCGTTATCTCGATCAAG   | 22 | 20 |
| 4   | - | 1239 | GTGCCTCGTTATCTCGATCAA    | 21 | 0  |

|     |   |      |                         |    |    |
|-----|---|------|-------------------------|----|----|
| 1   | - | 1240 | TTGTGCCTCGTTATCTCGATCA  | 22 | 1  |
| 6   | - | 1240 | TGTGCCTCGTTATCTCGATCA   | 21 | 1  |
| 10  | - | 1241 | TGTGCCTCGTTATCTCGATC    | 20 | 2  |
| 137 | - | 1241 | TTGTGCCTCGTTATCTCGATC   | 21 | 2  |
| 167 | - | 1242 | GTTGTGCCTCGTTATCTCGAT   | 21 | 3  |
| 17  | - | 1242 | TTGTGCCTCGTTATCTCGAT    | 20 | 3  |
| 17  | - | 1243 | AAGTTGTGCCTCGTTATCTCGA  | 22 | 4  |
| 460 | - | 1243 | AGTTGTGCCTCGTTATCTCGA   | 21 | 4  |
| 7   | - | 1243 | GTTGTGCCTCGTTATCTCGA    | 20 | 4  |
| 1   | - | 1244 | TAAGTTGTGCCTCGTTATCTCG  | 22 | 5  |
| 14  | - | 1245 | TAAGTTGTGCCTCGTTATCTC   | 21 | 6  |
| 21  | - | 1247 | TCTAAGTTGTGCCTCGTTATC   | 21 | 8  |
| 6   | - | 1247 | CTCTAAGTTGTGCCTCGTTATC  | 22 | 8  |
| 20  | - | 1249 | ACTCTAAGTTGTGCCTCGTTA   | 21 | 10 |
| 11  | - | 1251 | CAACTCTAAGTTGTGCCTCGT   | 21 | 12 |
| 4   | - | 1256 | ATACCCAACCTCTAAGTTGTGC  | 21 | 17 |
| 10  | - | 1257 | TCATACCCAACCTCTAAGTTGTG | 22 | 18 |
| 19  | - | 1257 | CATACCCAACCTCTAAGTTGTG  | 21 | 18 |
| 9   | - | 1260 | TATCATACCCAACCTCTAAGTT  | 21 | 0  |
| 2   | - | 1264 | AAGCTATCATACCCAACCTCTA  | 21 | 4  |
| 1   | - | 1271 | TCTCATGTAAGCTATCATACCC  | 22 | 11 |
| 21  | - | 1271 | CTCATGTAAGCTATCATACCC   | 21 | 11 |
| 17  | - | 1272 | ATGTAAGCTATCATACC       | 17 | 12 |
| 32  | - | 1272 | TCTCATGTAAGCTATCATACC   | 21 | 12 |
| 48  | - | 1272 | TTCTCATGTAAGCTATCATACC  | 22 | 12 |
| 12  | - | 1273 | TTCTCATGTAAGCTATCATAC   | 21 | 13 |
| 14  | - | 1275 | CGTTCTCATGTAAGCTATCAT   | 21 | 15 |
| 34  | - | 1276 | TCGTTCTCATGTAAGCTATCA   | 21 | 16 |
| 43  | - | 1277 | CTCGTTCTCATGTAAGCTATC   | 21 | 17 |
| 46  | - | 1279 | TGCTCGTTCTCATGTAAGCTA   | 21 | 19 |
| 121 | - | 1280 | TTGCTCGTTCTCATGTAAGCT   | 21 | 20 |
| 6   | - | 1281 | CTTGCTCGTTCTCATGTAAGC   | 21 | 0  |
| 8   | - | 1282 | GCTTGCTCGTTCTCATGTAAG   | 21 | 1  |
| 7   | - | 1283 | AGCTTGCTCGTTCTCATGTAA   | 21 | 2  |
| 10  | - | 1284 | AAAGCTTGCTCGTTCTCATGTA  | 22 | 3  |
| 116 | - | 1284 | AAGCTTGCTCGTTCTCATGTA   | 21 | 3  |
| 73  | - | 1285 | AAAGCTTGCTCGTTCTCATGT   | 21 | 4  |
| 37  | - | 1286 | ATAAAGCTTGCTCGTTCTCATG  | 22 | 5  |
| 81  | - | 1286 | TAAAGCTTGCTCGTTCTCATG   | 21 | 5  |
| 19  | - | 1287 | ATAAAGCTTGCTCGTTCTCAT   | 21 | 6  |
| 3   | - | 1288 | AAATAAAGCTTGCTCGTTCTCA  | 22 | 7  |
| 98  | - | 1288 | AATAAAGCTTGCTCGTTCTCA   | 21 | 7  |
| 34  | - | 1289 | AAATAAAGCTTGCTCGTTCTC   | 21 | 8  |
| 24  | - | 1293 | TGAGAAATAAAGCTTGCTCGT   | 21 | 12 |

|      |   |      |                               |    |    |
|------|---|------|-------------------------------|----|----|
| 4    | - | 1294 | CTGAGAAATAAAGCTTGCTCG         | 21 | 13 |
| 2    | - | 1301 | CTGCAATGCTGAGAAATAAAGC        | 22 | 20 |
| 5    | - | 1303 | ACTGCAATGCTGAGAAATAAA         | 21 | 1  |
| 13   | - | 1305 | AGACTGCAATGCTGAGAAATA         | 21 | 3  |
| 1    | - | 1305 | GTTGAAGAAGACTGCAATGCTGAGAAATA | 29 | 3  |
| 11   | - | 1306 | AAGACTGCAATGCTGAGAAAT         | 21 | 4  |
| 20   | - | 1307 | GAAGACTGCAATGCTGAGAAA         | 21 | 5  |
| 120  | - | 1308 | AGAAGACTGCAATGCTGAGAA         | 21 | 6  |
| 9    | - | 1308 | GAAGACTGCAATGCTGAGAA          | 20 | 6  |
| 1171 | - | 1309 | AAGAAGACTGCAATGCTGAGA         | 21 | 7  |
| 1    | - | 1309 | GAAGAAGACTGCAATGCTGAGA        | 22 | 7  |
| 4    | - | 1310 | AAGAAGACTGCAATGCTGAG          | 20 | 8  |
| 6    | - | 1310 | TGAAGAAGACTGCAATGCTGAG        | 22 | 8  |
| 73   | - | 1310 | GAAGAAGACTGCAATGCTGAG         | 21 | 8  |
| 7    | - | 1310 | TTGAAGAAGACTGCAATGCTGAG       | 23 | 8  |
| 125  | - | 1311 | TGAAGAAGACTGCAATGCTGA         | 21 | 9  |
| 229  | - | 1311 | TTGAAGAAGACTGCAATGCTGA        | 22 | 9  |
| 26   | - | 1312 | TTGAAGAAGACTGCAATGCTG         | 21 | 10 |
| 5    | - | 1312 | GTTGAAGAAGACTGCAATGCTG        | 22 | 10 |
| 1    | - | 1313 | TTGAAGAAGACTGCAATGCT          | 20 | 11 |
| 5    | - | 1313 | AGTTGAAGAAGACTGCAATGCT        | 22 | 11 |
| 12   | - | 1318 | TTTATAGTTGAAGAAGACTGCA        | 22 | 16 |
| 3    | - | 1318 | TTATAGTTGAAGAAGACTGCA         | 21 | 16 |
| 19   | - | 1319 | TTTATAGTTGAAGAAGACTGC         | 21 | 17 |
| 14   | - | 1323 | GGTCTTTATAGTTGAAGAAGA         | 21 | 0  |
| 40   | - | 1325 | ACGGTCTTTATAGTTGAAGAA         | 21 | 2  |
| 1    | - | 1326 | GACGGTCTTTATAGTTGAAGA         | 21 | 3  |
| 20   | - | 1326 | TGACGGTCTTTATAGTTGAAGA        | 22 | 3  |
| 59   | - | 1327 | TGACGGTCTTTATAGTTGAAG         | 21 | 4  |
| 5    | - | 1327 | AGCTGACGGTCTTTATAGTTGAAG      | 24 | 4  |
| 5    | - | 1327 | CTGACGGTCTTTATAGTTGAAG        | 22 | 4  |
| 22   | - | 1328 | CTGACGGTCTTTATAGTTGAA         | 21 | 5  |
| 19   | - | 1329 | AGCTGACGGTCTTTATAGTTGA        | 22 | 6  |
| 32   | - | 1329 | GCTGACGGTCTTTATAGTTGA         | 21 | 6  |
| 1    | - | 1330 | AAGCTGACGGTCTTTATAGTTG        | 22 | 7  |
| 30   | - | 1330 | AGCTGACGGTCTTTATAGTTG         | 21 | 7  |
| 3    | - | 1330 | GCTGACGGTCTTTATAGTTG          | 20 | 7  |
| 63   | - | 1331 | AAGCTGACGGTCTTTATAGTT         | 21 | 8  |
| 6    | - | 1332 | ACAAGCTGACGGTCTTTATAGT        | 22 | 9  |
| 18   | - | 1334 | TCACAAGCTGACGGTCTTTATA        | 22 | 11 |
| 1    | - | 1335 | TCACAAGCTGACGGTCTTTAT         | 21 | 12 |
| 2    | - | 1335 | ATCACAAGCTGACGGTCTTTAT        | 22 | 12 |
| 15   | - | 1336 | ATCACAAGCTGACGGTCTTTA         | 21 | 13 |
| 28   | - | 1337 | CATCACAAGCTGACGGTCTTT         | 21 | 14 |

|     |   |      |                          |    |    |
|-----|---|------|--------------------------|----|----|
| 1   | - | 1338 | CCATCACAAGCTGACGGTCTT    | 21 | 15 |
| 15  | - | 1341 | ATGGCCATCACAAGCTGACGGT   | 22 | 18 |
| 41  | - | 1341 | TGGCCATCACAAGCTGACGGT    | 21 | 18 |
| 26  | - | 1342 | CATGGCCATCACAAGCTGACGG   | 22 | 19 |
| 2   | - | 1342 | GCCATCACAAGCTGACGG       | 18 | 19 |
| 747 | - | 1342 | ATGGCCATCACAAGCTGACGG    | 21 | 19 |
| 22  | - | 1344 | GCATGGCCATCACAAGCTGAC    | 21 | 0  |
| 13  | - | 1345 | AGCATGGCCATCACAAGCTGA    | 21 | 1  |
| 10  | - | 1347 | AGGAGCATGGCCATCACAAGCT   | 22 | 3  |
| 4   | - | 1348 | AAGGAGCATGGCCATCACAAGC   | 22 | 4  |
| 56  | - | 1349 | AAGGAGCATGGCCATCACAAG    | 21 | 5  |
| 63  | - | 1351 | TCAAGGAGCATGGCCATCACA    | 21 | 7  |
| 10  | - | 1352 | GTCAAGGAGCATGGCCATCAC    | 21 | 8  |
| 16  | - | 1354 | ACTGTCAAGGAGCATGGCCATC   | 22 | 10 |
| 115 | - | 1357 | TTACTGTCAAGGAGCATGGCC    | 21 | 13 |
| 3   | - | 1358 | GTTACTGTCAAGGAGCATGGC    | 21 | 14 |
| 13  | - | 1359 | GGTACTGTCAAGGAGCATGG     | 21 | 15 |
| 1   | - | 1360 | CTAGGTTACTGTCAAGGAGCATG  | 23 | 16 |
| 3   | - | 1360 | AGGTTACTGTCAAGGAGCATG    | 21 | 16 |
| 99  | - | 1360 | TAGGTTACTGTCAAGGAGCATG   | 22 | 16 |
| 43  | - | 1361 | CTAGGTTACTGTCAAGGAGCAT   | 22 | 17 |
| 5   | - | 1361 | TAGGTTACTGTCAAGGAGCAT    | 21 | 17 |
| 10  | - | 1362 | CATCTAGGTTACTGTCAAGGAGCA | 24 | 18 |
| 167 | - | 1362 | TCTAGGTTACTGTCAAGGAGCA   | 22 | 18 |
| 1   | - | 1362 | ATCTAGGTTACTGTCAAGGAGCA  | 23 | 18 |
| 800 | - | 1362 | CTAGGTTACTGTCAAGGAGCA    | 21 | 18 |
| 194 | - | 1363 | ATCTAGGTTACTGTCAAGGAGC   | 22 | 19 |
| 27  | - | 1363 | CTAGGTTACTGTCAAGGAGC     | 20 | 19 |
| 480 | - | 1363 | TCTAGGTTACTGTCAAGGAGC    | 21 | 19 |
| 78  | - | 1363 | ACATCTAGGTTACTGTCAAGGAGC | 24 | 19 |
| 147 | - | 1364 | ATCTAGGTTACTGTCAAGGAG    | 21 | 20 |
| 170 | - | 1365 | CATCTAGGTTACTGTCAAGGA    | 21 | 0  |
| 11  | - | 1366 | CGACATCTAGGTTACTGTCAAGG  | 23 | 1  |
| 152 | - | 1366 | ACATCTAGGTTACTGTCAAGG    | 21 | 1  |
| 29  | - | 1367 | TCGACATCTAGGTTACTGTCAAG  | 23 | 2  |
| 2   | - | 1367 | CGACATCTAGGTTACTGTCAAG   | 22 | 2  |
| 8   | - | 1368 | CGACATCTAGGTTACTGTCAA    | 21 | 3  |
| 1   | - | 1369 | CTCGACATCTAGGTTACTGTCA   | 22 | 4  |
| 49  | - | 1369 | TCGACATCTAGGTTACTGTCA    | 21 | 4  |
| 7   | - | 1369 | TACTCGACATCTAGGTTACTGTCA | 24 | 4  |
| 216 | - | 1370 | CTCGACATCTAGGTTACTGTC    | 21 | 5  |
| 3   | - | 1370 | ATACTCGACATCTAGGTTACTGTC | 24 | 5  |
| 101 | - | 1371 | ACTCGACATCTAGGTTACTGT    | 21 | 6  |
| 32  | - | 1371 | TACTCGACATCTAGGTTACTGT   | 22 | 6  |

|     |   |      |                          |    |    |
|-----|---|------|--------------------------|----|----|
| 3   | - | 1371 | ATACTCGACATCTAGGTTACTGT  | 23 | 6  |
| 9   | - | 1371 | CTCGACATCTAGGTTACTGT     | 20 | 6  |
| 147 | - | 1372 | TACTCGACATCTAGGTTACTG    | 21 | 7  |
| 36  | - | 1372 | ATACTCGACATCTAGGTTACTG   | 22 | 7  |
| 32  | - | 1373 | CCCATACTCGACATCTAGGTTACT | 24 | 8  |
| 92  | - | 1373 | ATACTCGACATCTAGGTTACT    | 21 | 8  |
| 2   | - | 1376 | ACCCATACTCGACATCTAGGTT   | 22 | 11 |
| 31  | - | 1376 | CCCATACTCGACATCTAGGTT    | 21 | 11 |
| 20  | - | 1377 | ACCCATACTCGACATCTAGGT    | 21 | 12 |
| 17  | - | 1378 | TAACCCATACTCGACATCTAGG   | 22 | 13 |
| 1   | - | 1378 | ACCCATACTCGACATCTAGG     | 20 | 13 |
| 258 | - | 1378 | AACCCATACTCGACATCTAGG    | 21 | 13 |
| 64  | - | 1378 | CCCATACTCGACATCTAGG      | 19 | 13 |
| 1   | - | 1379 | TAACCCATACTCGACATCTAG    | 21 | 14 |
| 3   | - | 1379 | TTAACCCATACTCGACATCTAG   | 22 | 14 |
| 2   | - | 1380 | CTTAACCCATACTCGACATCTA   | 22 | 15 |
| 45  | - | 1380 | TTAACCCATACTCGACATCTA    | 21 | 15 |
| 4   | - | 1381 | TTAACCCATACTCGACATCT     | 20 | 16 |
| 6   | - | 1381 | CTTAACCCATACTCGACATCT    | 21 | 16 |
| 14  | - | 1382 | TTAACCCATACTCGACATC      | 19 | 17 |
| 5   | - | 1382 | TCTTAACCCATACTCGACATC    | 21 | 17 |
| 6   | - | 1382 | TTCTTAACCCATACTCGACATC   | 22 | 17 |
| 4   | - | 1383 | TTCTTAACCCATACTCGACAT    | 21 | 18 |
| 21  | - | 1393 | TTGGCGAGGGTTCTTAACCCA    | 21 | 7  |
| 5   | - | 1396 | TTATTGGCGAGGGTTCTTAAC    | 21 | 10 |
| 13  | - | 1397 | TTTATTGGCGAGGGTTCTTAA    | 21 | 11 |
| 17  | - | 1398 | ATTTATTGGCGAGGGTTCTTA    | 21 | 12 |
| 6   | - | 1398 | GATTTATTGGCGAGGGTTCTTA   | 22 | 12 |
| 3   | - | 1401 | AGAGATTTATTGGCGAGGGTTC   | 22 | 15 |
| 3   | - | 1402 | TTAGAGATTTATTGGCGAGGGTT  | 23 | 16 |
| 9   | - | 1402 | AGAGATTTATTGGCGAGGGTT    | 21 | 16 |
| 13  | - | 1403 | TTAGAGATTTATTGGCGAGGGT   | 22 | 17 |
| 3   | - | 1403 | TAGAGATTTATTGGCGAGGGT    | 21 | 17 |
| 454 | - | 1404 | TTAGAGATTTATTGGCGAGGG    | 21 | 18 |
| 9   | - | 1404 | ATTAGAGATTTATTGGCGAGGG   | 22 | 18 |
| 24  | - | 1405 | TATTAGAGATTTATTGGCGAGG   | 22 | 19 |
| 3   | - | 1405 | AGAGATTTATTGGCGAGG       | 18 | 19 |
| 77  | - | 1405 | ATTAGAGATTTATTGGCGAGG    | 21 | 19 |
| 203 | - | 1406 | TATTAGAGATTTATTGGCGAG    | 21 | 20 |
| 10  | - | 1407 | GTATTAGAGATTTATTGGCGA    | 21 | 0  |
| 10  | - | 1407 | TGTATTAGAGATTTATTGGCGA   | 22 | 0  |
| 13  | - | 1407 | TATTAGAGATTTATTGGCGA     | 20 | 0  |
| 267 | - | 1408 | TGTATTAGAGATTTATTGGCG    | 21 | 1  |
| 5   | - | 1408 | ATGTATTAGAGATTTATTGGCG   | 22 | 1  |

|     |   |      |                          |    |    |
|-----|---|------|--------------------------|----|----|
| 30  | - | 1409 | ATGTATTAGAGATTTATTGGC    | 21 | 2  |
| 9   | - | 1409 | TATGTATTAGAGATTTATTGGC   | 22 | 2  |
| 15  | - | 1410 | TATGTATTAGAGATTTATTGG    | 21 | 3  |
| 27  | - | 1410 | ATATGTATTAGAGATTTATTGG   | 22 | 3  |
| 10  | - | 1412 | ATATATGTATTAGAGATTTATT   | 22 | 5  |
| 5   | - | 1415 | CCTAGATATATGTATTAGAGATTT | 24 | 8  |
| 5   | - | 1416 | TAGATATATGTATTAGAGATT    | 21 | 9  |
| 18  | - | 1417 | CTAGATATATGTATTAGAGAT    | 21 | 10 |
| 2   | - | 1417 | CCTAGATATATGTATTAGAGAT   | 22 | 10 |
| 7   | - | 1418 | TCCTAGATATATGTATTAGAGA   | 22 | 11 |
| 169 | - | 1420 | TTCCTAGATATATGTATTAGA    | 21 | 13 |
| 50  | - | 1423 | TCATTCCTAGATATATGTATT    | 21 | 16 |
| 10  | - | 1425 | TCTCATTCCTAGATATATGTA    | 21 | 18 |
| 15  | - | 1425 | TTCTCATTCCTAGATATATGTA   | 22 | 18 |
| 48  | - | 1425 | TTTTCTCATTCCTAGATATATGTA | 24 | 18 |
| 8   | - | 1426 | TTTCTCATTCCTAGATATATGT   | 22 | 19 |
| 91  | - | 1426 | TTCTCATTCCTAGATATATGT    | 21 | 19 |
| 9   | - | 1426 | TCTCATTCCTAGATATATGT     | 20 | 19 |
| 21  | - | 1427 | TTTTCTCATTCCTAGATATATG   | 22 | 20 |
| 39  | - | 1427 | TTTCTCATTCCTAGATATATG    | 21 | 20 |
| 10  | - | 1429 | TATTTTCTCATTCCTAGATATA   | 22 | 1  |
| 14  | - | 1429 | ATTTTCTCATTCCTAGATATA    | 21 | 1  |
| 1   | - | 1429 | TTTTCTCATTCCTAGATATA     | 20 | 1  |
| 7   | - | 1430 | TATTTTCTCATTCCTAGATAT    | 21 | 2  |
| 338 | - | 1431 | ACTATTTTCTCATTCCTAGATA   | 22 | 3  |
| 8   | - | 1431 | TCACTATTTTCTCATTCCTAGATA | 24 | 3  |
| 34  | - | 1432 | ATTTTCTCATTCCTAGAT       | 18 | 4  |
| 58  | - | 1432 | CACTATTTTCTCATTCCTAGAT   | 22 | 4  |
| 68  | - | 1432 | ACTATTTTCTCATTCCTAGAT    | 21 | 4  |
| 123 | - | 1433 | TCACTATTTTCTCATTCCTAGA   | 22 | 5  |
| 5   | - | 1433 | CACTATTTTCTCATTCCTAGA    | 21 | 5  |
| 12  | - | 1434 | ATCACTATTTTCTCATTCCTAG   | 22 | 6  |
| 37  | - | 1434 | TCACTATTTTCTCATTCCTAG    | 21 | 6  |
| 20  | - | 1435 | CATCACTATTTTCTCATTCCTA   | 22 | 7  |
| 6   | - | 1435 | ATCACTATTTTCTCATTCCTA    | 21 | 7  |
| 23  | - | 1436 | CATCACTATTTTCTCATTCCT    | 21 | 8  |
| 3   | - | 1437 | TGCATCACTATTTTCTCATTC    | 22 | 9  |
| 1   | - | 1438 | TGCATCACTATTTTCTCATTC    | 21 | 10 |
| 12  | - | 1440 | TATGCATCACTATTTTCTCAT    | 21 | 12 |
| 1   | - | 1441 | TATGCATCACTATTTTCTCA     | 20 | 13 |
| 32  | - | 1441 | TTATGCATCACTATTTTCTCA    | 21 | 13 |
| 10  | - | 1443 | TTATGCATCACTATTTTCT      | 19 | 15 |
| 8   | - | 1445 | AAGTTATGCATCACTATTTT     | 20 | 17 |
| 130 | - | 1450 | TTGTAGTAAGTTATGCATCACT   | 22 | 1  |

|     |   |      |                         |    |    |
|-----|---|------|-------------------------|----|----|
| 18  | - | 1450 | TGTAGTAAGTTATGCATCACT   | 21 | 1  |
| 14  | - | 1451 | TTGTAGTAAGTTATGCATCAC   | 21 | 2  |
| 32  | - | 1453 | TGTTGTAGTAAGTTATGCATC   | 21 | 4  |
| 46  | - | 1455 | CATGTTGTAGTAAGTTATGCA   | 21 | 6  |
| 6   | - | 1455 | ACATGTTGTAGTAAGTTATGCA  | 22 | 6  |
| 13  | - | 1456 | CACATGTTGTAGTAAGTTATGC  | 22 | 7  |
| 41  | - | 1456 | ACATGTTGTAGTAAGTTATGC   | 21 | 7  |
| 13  | - | 1457 | CCACATGTTGTAGTAAGTTATG  | 22 | 8  |
| 5   | - | 1459 | ACCCACATGTTGTAGTAAGTTA  | 22 | 10 |
| 4   | - | 1460 | ACCCACATGTTGTAGTAAGTT   | 21 | 11 |
| 21  | - | 1461 | TACCCACATGTTGTAGTAAGT   | 21 | 12 |
| 6   | - | 1464 | TCTACCCACATGTTGTAGTA    | 20 | 15 |
| 11  | - | 1465 | TTGTCTACCCACATGTTGTAGT  | 22 | 16 |
| 6   | - | 1465 | TGTCTACCCACATGTTGTAGT   | 21 | 16 |
| 18  | - | 1466 | TTGTCTACCCACATGTTGTAG   | 21 | 17 |
| 4   | - | 1467 | CTTGTCTACCCACATGTTGTA   | 21 | 18 |
| 7   | - | 1468 | CTTGTCTACCCACATGTTGT    | 20 | 19 |
| 33  | - | 1470 | TGGCTTGTCTACCCACATGTT   | 21 | 0  |
| 5   | - | 1471 | ATGGCTTGTCTACCCACATGT   | 21 | 1  |
| 4   | - | 1472 | AATGGCTTGTCTACCCACATG   | 21 | 2  |
| 10  | - | 1474 | TGAATGGCTTGTCTACCCACA   | 21 | 4  |
| 8   | - | 1475 | TTGAATGGCTTGTCTACCCAC   | 21 | 5  |
| 24  | - | 1476 | TTGAATGGCTTGTCTACCCA    | 21 | 6  |
| 1   | - | 1477 | GTCTTTGAATGGCTTGTCTACCC | 23 | 7  |
| 5   | - | 1477 | CTTTGAATGGCTTGTCTACCC   | 21 | 7  |
| 66  | - | 1477 | TCTTTGAATGGCTTGTCTACCC  | 22 | 7  |
| 3   | - | 1478 | TCTTTGAATGGCTTGTCTACC   | 21 | 8  |
| 160 | - | 1479 | GTCTTTGAATGGCTTGTCTAC   | 21 | 9  |
| 24  | - | 1480 | TGTCTTTGAATGGCTTGTCTA   | 21 | 10 |
| 72  | - | 1480 | TTGTCTTTGAATGGCTTGTCTA  | 22 | 10 |
| 1   | - | 1481 | TGTCTTTGAATGGCTTGTCT    | 20 | 11 |
| 211 | - | 1481 | TTGTCTTTGAATGGCTTGTCT   | 21 | 11 |
| 3   | - | 1482 | CTTGTCTTTGAATGGCTTGTCT  | 21 | 12 |
| 1   | - | 1483 | TCTTGTCTTTGAATGGCTTGT   | 21 | 13 |
| 9   | - | 1485 | GGTTCTTGTCTTTGAATGGCTT  | 22 | 15 |
| 5   | - | 1486 | AGGTTCTTGTCTTTGAATGGCT  | 22 | 16 |
| 8   | - | 1486 | GGTTCTTGTCTTTGAATGGCT   | 21 | 16 |
| 182 | - | 1487 | AGGTTCTTGTCTTTGAATGGC   | 21 | 17 |
| 95  | - | 1488 | AAGGTTCTTGTCTTTGAATGG   | 21 | 18 |
| 12  | - | 1490 | CCAAGGTTCTTGTCTTTGAAT   | 21 | 20 |
| 72  | - | 1491 | TCCAAGGTTCTTGTCTTTGAA   | 21 | 0  |
| 18  | - | 1492 | TTCCAAGGTTCTTGTCTTTGA   | 22 | 1  |
| 110 | - | 1495 | CGTTTCCAAGGTTCTTGTCTT   | 21 | 4  |
| 27  | - | 1497 | TGGCGTTTCCAAGGTTCTTGTCT | 22 | 6  |



|     |   |      |                        |    |    |
|-----|---|------|------------------------|----|----|
| 5   | - | 1498 | TGGCGTTTCCAAGGTTCTTGT  | 21 | 7  |
| 7   | - | 1499 | TGTGGCGTTTCCAAGGTTCTTG | 22 | 8  |
| 11  | - | 1500 | TGTGGCGTTTCCAAGGTTCTT  | 21 | 9  |
| 21  | - | 1501 | ATGTGGCGTTTCCAAGGTTCT  | 21 | 10 |
| 186 | - | 1503 | AGATGTGGCGTTTCCAAGGTT  | 21 | 12 |
| 3   | - | 1503 | AAGATGTGGCGTTTCCAAGGTT | 22 | 12 |
| 163 | - | 1504 | AAGATGTGGCGTTTCCAAGGT  | 21 | 13 |
| 26  | - | 1504 | TAAGATGTGGCGTTTCCAAGGT | 22 | 13 |
| 107 | - | 1505 | TAAAGATGTGGCGTTTCCAAGG | 22 | 14 |
| 46  | - | 1505 | TAAGATGTGGCGTTTCCAAGG  | 21 | 14 |
| 3   | - | 1506 | ATTAAGATGTGGCGTTTCCAAG | 22 | 15 |
| 48  | - | 1506 | TAAAGATGTGGCGTTTCCAAG  | 21 | 15 |
| 116 | - | 1507 | ATTAAGATGTGGCGTTTCCAA  | 21 | 16 |
| 1   | - | 1508 | ATTAAGATGTGGCGTTTCCA   | 20 | 17 |
| 263 | - | 1508 | TATTAAGATGTGGCGTTTCCA  | 21 | 17 |
| 49  | - | 1509 | TCTATTAAGATGTGGCGTTTCC | 22 | 18 |
| 10  | - | 1511 | ATCTATTAAGATGTGGCGTTT  | 21 | 20 |
| 28  | - | 1520 | CTCGTCAGCATCTATTAAGAT  | 21 | 8  |
| 7   | - | 1520 | TCTCGTCAGCATCTATTAAGAT | 22 | 8  |
| 1   | - | 1521 | CTCGTCAGCATCTATTAAGA   | 20 | 9  |
| 4   | - | 1521 | ATCTCGTCAGCATCTATTAAGA | 22 | 9  |
| 7   | - | 1521 | TCTCGTCAGCATCTATTAAGA  | 21 | 9  |
| 247 | - | 1522 | TATCTCGTCAGCATCTATTAAG | 22 | 10 |
| 7   | - | 1522 | ATCTCGTCAGCATCTATTAAG  | 21 | 10 |
| 4   | - | 1523 | TATCTCGTCAGCATCTATTA   | 21 | 11 |
| 6   | - | 1524 | TATCTCGTCAGCATCTATTA   | 20 | 12 |
| 70  | - | 1524 | ATATCTCGTCAGCATCTATTA  | 21 | 12 |
| 38  | - | 1525 | CATATCTCGTCAGCATCTATT  | 21 | 13 |
| 6   | - | 1525 | GCATATCTCGTCAGCATCTATT | 22 | 13 |
| 8   | - | 1526 | GCATATCTCGTCAGCATCTAT  | 21 | 14 |
| 3   | - | 1527 | TGCATATCTCGTCAGCATCTA  | 21 | 15 |
| 7   | - | 1527 | TTGCATATCTCGTCAGCATCTA | 22 | 15 |
| 2   | - | 1528 | ATTGCATATCTCGTCAGCATCT | 22 | 16 |
| 3   | - | 1528 | TGCATATCTCGTCAGCATCT   | 20 | 16 |
| 73  | - | 1528 | TTGCATATCTCGTCAGCATCT  | 21 | 16 |
| 29  | - | 1529 | ATTGCATATCTCGTCAGCATC  | 21 | 17 |
| 3   | - | 1530 | CATTGCATATCTCGTCAGCAT  | 21 | 18 |
| 15  | - | 1531 | GACATTGCATATCTCGTCAGCA | 22 | 19 |
| 192 | - | 1531 | ACATTGCATATCTCGTCAGCA  | 21 | 19 |
| 10  | - | 1532 | GGACATTGCATATCTCGTCAGC | 22 | 20 |
| 2   | - | 1533 | GGACATTGCATATCTCGTCAG  | 21 | 0  |
| 2   | - | 1534 | AAGGACATTGCATATCTCGTCA | 22 | 1  |
| 7   | - | 1534 | AGGACATTGCATATCTCGTCA  | 21 | 1  |
| 12  | - | 1535 | CAAGGACATTGCATATCTCGTC | 22 | 2  |

|     |   |      |                             |    |    |
|-----|---|------|-----------------------------|----|----|
| 184 | - | 1535 | AAGGACATTGCATATCTCGTC       | 21 | 2  |
| 7   | - | 1535 | TTCAAGGACATTGCATATCTCGTC    | 24 | 2  |
| 104 | - | 1536 | CAAGGACATTGCATATCTCGT       | 21 | 3  |
| 20  | - | 1537 | TTCAAGGACATTGCATATCTCG      | 22 | 4  |
| 36  | - | 1537 | TCAAGGACATTGCATATCTCG       | 21 | 4  |
| 46  | - | 1538 | TTCAAGGACATTGCATATCTC       | 21 | 5  |
| 60  | - | 1539 | TTTCAAGGACATTGCATATCT       | 21 | 6  |
| 130 | - | 1540 | TTTTCAAGGACATTGCATATC       | 21 | 7  |
| 65  | - | 1540 | ATTTTCAAGGACATTGCATATC      | 22 | 7  |
| 46  | - | 1541 | ATTTTCAAGGACATTGCATAT       | 21 | 8  |
| 5   | - | 1542 | CTGTATCATTTTCAAGGACATTGCATA | 27 | 9  |
| 84  | - | 1542 | TCATTTTCAAGGACATTGCATA      | 22 | 9  |
| 1   | - | 1544 | TCATTTTCAAGGACATTGCA        | 20 | 11 |
| 232 | - | 1544 | ATCATTTTCAAGGACATTGCA       | 21 | 11 |
| 32  | - | 1544 | TATCATTTTCAAGGACATTGCA      | 22 | 11 |
| 124 | - | 1545 | TATCATTTTCAAGGACATTGC       | 21 | 12 |
| 6   | - | 1545 | GTATCATTTTCAAGGACATTGC      | 22 | 12 |
| 89  | - | 1547 | TGTATCATTTTCAAGGACATT       | 21 | 14 |
| 10  | - | 1548 | CTGTATCATTTTCAAGGACAT       | 21 | 15 |
| 11  | - | 1568 | TCCCTGACACAATTCTAGCATC      | 22 | 14 |
| 15  | - | 1570 | TATCCCTGACACAATTCTAGCA      | 22 | 16 |
| 5   | - | 1570 | ATCCCTGACACAATTCTAGCA       | 21 | 16 |
| 38  | - | 1571 | ATATCCCTGACACAATTCTAGC      | 22 | 17 |
| 8   | - | 1571 | TATCCCTGACACAATTCTAGC       | 21 | 17 |
| 6   | - | 1572 | ATATCCCTGACACAATTCTAG       | 21 | 18 |
| 3   | - | 1573 | GATATCCCTGACACAATTCTA       | 21 | 19 |
| 1   | - | 1575 | ATGATATCCCTGACACAATTC       | 21 | 0  |
| 18  | - | 1576 | AATGATATCCCTGACACAATT       | 21 | 1  |
| 17  | - | 1577 | AAATGATATCCCTGACACAAT       | 21 | 2  |
| 8   | - | 1578 | CAAATGATATCCCTGACACAA       | 21 | 3  |
| 8   | - | 1578 | TCAAATGATATCCCTGACACAA      | 22 | 3  |
| 9   | - | 1579 | TCAAATGATATCCCTGACACA       | 21 | 4  |
| 3   | - | 1581 | AAATGATATCCCTGACA           | 17 | 6  |
| 77  | - | 1583 | TATATCAAATGATATCCCTGA       | 21 | 8  |
| 17  | - | 1588 | CTGGATATATCAAATGATATC       | 21 | 13 |
| 7   | - | 1590 | TTCTGGATATATCAAATGATA       | 21 | 15 |
| 4   | - | 1593 | CGATTCTGGATATATCAAATG       | 21 | 18 |
| 12  | - | 1598 | CTTCGCCGATTCTGGATATATC      | 22 | 2  |
| 1   | - | 1598 | TCGCCGATTCTGGATATATC        | 20 | 2  |
| 53  | - | 1598 | TTCGCCGATTCTGGATATATC       | 21 | 2  |
| 138 | - | 1600 | ACTTCGCCGATTCTGGATATA       | 21 | 4  |
| 5   | - | 1600 | AACTTCGCCGATTCTGGATATA      | 22 | 4  |
| 110 | - | 1602 | AAACTTCGCCGATTCTGGATA       | 21 | 6  |
| 37  | - | 1602 | AAAACTTCGCCGATTCTGGATA      | 22 | 6  |

|     |   |      |                          |    |    |
|-----|---|------|--------------------------|----|----|
| 1   | - | 1603 | AAAACCTTCGCCGATTCTGGAT   | 21 | 7  |
| 176 | - | 1604 | AAAAACTTCGCCGATTCTGGA    | 21 | 8  |
| 1   | - | 1604 | AAAAAACTTCGCCGATTCTGGA   | 22 | 8  |
| 1   | - | 1605 | AAAAACTTCGCCGATTCTGG     | 20 | 9  |
| 412 | - | 1605 | AAAAAACTTCGCCGATTCTGG    | 21 | 9  |
| 4   | - | 1605 | AAAAAAACTTCGCCGATTCTGG   | 22 | 9  |
| 31  | - | 1606 | TAAAAAAACTTCGCCGATTCTG   | 22 | 10 |
| 54  | - | 1606 | AAAAAAACTTCGCCGATTCTG    | 21 | 10 |
| 8   | - | 1607 | TAAAAAAACTTCGCCGATTCT    | 21 | 11 |
| 134 | - | 1608 | TTAAAAAAACTTCGCCGATTC    | 21 | 12 |
| 1   | - | 1608 | TAAAAAAACTTCGCCGATTC     | 20 | 12 |
| 45  | - | 1610 | GCTTAAAAAAACTTCGCCGAT    | 21 | 14 |
| 30  | - | 1611 | CGCTTAAAAAAACTTCGCCGA    | 21 | 15 |
| 88  | - | 1611 | TCGCTTAAAAAAACTTCGCCGA   | 22 | 15 |
| 67  | - | 1612 | TCGCTTAAAAAAACTTCGCCG    | 21 | 16 |
| 32  | - | 1613 | CTCGCTTAAAAAAACTTCGCC    | 21 | 17 |
| 57  | - | 1614 | TCTCGCTTAAAAAAACTTCGC    | 21 | 18 |
| 9   | - | 1614 | CTCTCGCTTAAAAAAACTTCGC   | 22 | 18 |
| 16  | - | 1615 | CTCTCGCTTAAAAAAACTTCG    | 21 | 19 |
| 2   | - | 1616 | CTCTCTCGCTTAAAAAAACTTC   | 22 | 20 |
| 3   | - | 1617 | CTCTCTCGCTTAAAAAAACTT    | 21 | 0  |
| 26  | - | 1624 | TTAAAAGCTCTCTCGCTTAAA    | 21 | 7  |
| 2   | - | 1625 | TAAAAGCTCTCTCGCTTAA      | 20 | 8  |
| 20  | - | 1626 | TTTTAAAAGCTCTCTCGCTTA    | 21 | 9  |
| 10  | - | 1627 | CTTTAAAAGCTCTCTCGCTT     | 21 | 10 |
| 4   | - | 1627 | AATCTTTTAAAAGCTCTCTCGCTT | 24 | 10 |
| 13  | - | 1628 | ATCTTTTAAAAGCTCTCTCGCT   | 22 | 11 |
| 9   | - | 1628 | TCTTTTAAAAGCTCTCTCGCT    | 21 | 11 |
| 118 | - | 1629 | ATCTTTTAAAAGCTCTCTCGC    | 21 | 12 |
| 5   | - | 1630 | AATCTTTTAAAAGCTCTCTCG    | 21 | 13 |
| 7   | - | 1630 | TCTTTTAAAAGCTCTCTCG      | 19 | 13 |
| 46  | - | 1631 | CAATCTTTTAAAAGCTCTCTC    | 21 | 14 |
| 8   | - | 1632 | ACAATCTTTTAAAAGCTCTCT    | 21 | 15 |
| 19  | - | 1633 | CACAATCTTTTAAAAGCTCTC    | 21 | 16 |
| 20  | - | 1634 | ACACAATCTTTTAAAAGCTCT    | 21 | 17 |
| 19  | - | 1648 | AGGAATTGGAGATTACACAAT    | 21 | 10 |
| 4   | - | 1649 | GAGGAATTGGAGATTACACAA    | 21 | 11 |
| 102 | - | 1650 | CTGAGGAATTGGAGATTACACA   | 22 | 12 |
| 99  | - | 1650 | TGAGGAATTGGAGATTACACA    | 21 | 12 |
| 24  | - | 1651 | CTGAGGAATTGGAGATTACAC    | 21 | 13 |
| 22  | - | 1656 | ACACCCTGAGGAATTGGAGAT    | 21 | 18 |
| 212 | - | 1657 | AACACCCTGAGGAATTGGAGA    | 21 | 19 |
| 34  | - | 1658 | AAACACCCTGAGGAATTGGAG    | 21 | 20 |
| 137 | - | 1659 | TAAACACCCTGAGGAATTGGA    | 21 | 0  |

|     |   |      |                          |    |    |
|-----|---|------|--------------------------|----|----|
| 9   | - | 1659 | TTAAACACCCTGAGGAATTGGA   | 22 | 0  |
| 4   | - | 1660 | CTTAAACACCCTGAGGAATTGG   | 22 | 1  |
| 6   | - | 1660 | TTAAACACCCTGAGGAATTGG    | 21 | 1  |
| 16  | - | 1664 | CAGTCTTAAACACCCTGAGGAA   | 22 | 5  |
| 1   | - | 1665 | AGTCTTAAACACCCTGAGGA     | 20 | 6  |
| 234 | - | 1665 | CAGTCTTAAACACCCTGAGGA    | 21 | 6  |
| 94  | - | 1666 | CCAGTCTTAAACACCCTGAGG    | 21 | 7  |
| 3   | - | 1667 | TCCAGTCTTAAACACCCTGAG    | 21 | 8  |
| 115 | - | 1668 | ATCCAGTCTTAAACACCCTGA    | 21 | 9  |
| 1   | - | 1668 | CAGTCTTAAACACCCTGA       | 18 | 9  |
| 39  | - | 1668 | TATCCAGTCTTAAACACCCTGA   | 22 | 9  |
| 6   | - | 1669 | TATCCAGTCTTAAACACCCTG    | 21 | 10 |
| 10  | - | 1670 | ATATCCAGTCTTAAACACCCT    | 21 | 11 |
| 5   | - | 1671 | CATATCCAGTCTTAAACACCC    | 21 | 12 |
| 2   | - | 1672 | CATATCCAGTCTTAAACACC     | 20 | 13 |
| 3   | - | 1672 | ATCATATCCAGTCTTAAACACC   | 22 | 13 |
| 61  | - | 1672 | TCATATCCAGTCTTAAACACC    | 21 | 13 |
| 20  | - | 1673 | ATCATATCCAGTCTTAAACAC    | 21 | 14 |
| 8   | - | 1674 | TCATCATATCCAGTCTTAAACA   | 22 | 15 |
| 1   | - | 1675 | TCATCATATCCAGTCTTAAAC    | 21 | 16 |
| 3   | - | 1675 | TTCATCATATCCAGTCTTAAAC   | 22 | 16 |
| 7   | - | 1676 | TTCATCATATCCAGTCTTAAA    | 21 | 17 |
| 10  | - | 1678 | TTTTTCATCATATCCAGTCTTA   | 21 | 19 |
| 5   | - | 1679 | TTTTTCATCATATCCAGTCTT    | 21 | 20 |
| 10  | - | 1680 | TTTTTCATCATATCCAGTCT     | 21 | 0  |
| 58  | - | 1681 | TTTTTTTCATCATATCCAGTC    | 21 | 1  |
| 10  | - | 1683 | TGTTTTTTTCATCATATCCAG    | 21 | 3  |
| 1   | - | 1683 | GTTTTTTTCATCATATCCAG     | 20 | 3  |
| 7   | - | 1684 | CTGTTTTTTTCATCATATCCA    | 21 | 4  |
| 9   | - | 1686 | CTCTGTTTTTTTCATCATATC    | 21 | 6  |
| 9   | - | 1691 | TGCGCACTCTGTTTTTTTCATC   | 22 | 11 |
| 3   | - | 1692 | TGCGCACTCTGTTTTTTTCAT    | 21 | 12 |
| 12  | - | 1698 | CCGGTATGCGCACTCTGTTTT    | 21 | 18 |
| 5   | - | 1698 | TCCGGTATGCGCACTCTGTTTT   | 22 | 18 |
| 51  | - | 1699 | TCCGGTATGCGCACTCTGTTTT   | 21 | 19 |
| 18  | - | 1700 | TCTCCGGTATGCGCACTCTGTT   | 22 | 20 |
| 19  | - | 1700 | CTCCGGTATGCGCACTCTGTT    | 21 | 20 |
| 8   | - | 1700 | TCCGGTATGCGCACTCTGTT     | 20 | 20 |
| 12  | - | 1701 | TCTCCGGTATGCGCACTCTGT    | 21 | 0  |
| 130 | - | 1701 | TTCTCCGGTATGCGCACTCTGT   | 22 | 0  |
| 17  | - | 1702 | TTCTCCGGTATGCGCACTCTG    | 21 | 1  |
| 30  | - | 1703 | CATGTTCTCCGGTATGCGCACTCT | 24 | 2  |
| 15  | - | 1704 | TGTTCTCCGGTATGCGCACTC    | 21 | 3  |
| 19  | - | 1705 | CATGTTCTCCGGTATGCGCACT   | 22 | 4  |

|     |   |      |                         |    |    |
|-----|---|------|-------------------------|----|----|
| 37  | - | 1705 | ATGTTCTCCGGTATGCGCACT   | 21 | 4  |
| 15  | - | 1706 | CATGTTCTCCGGTATGCGCAC   | 21 | 5  |
| 61  | - | 1707 | CCATGTTCTCCGGTATGCGCA   | 21 | 6  |
| 30  | - | 1708 | TCCATGTTCTCCGGTATGCGC   | 21 | 7  |
| 21  | - | 1709 | CTCCATGTTCTCCGGTATGCG   | 21 | 8  |
| 9   | - | 1709 | ACTCCATGTTCTCCGGTATGCG  | 22 | 8  |
| 26  | - | 1710 | AACTCCATGTTCTCCGGTATGC  | 22 | 9  |
| 5   | - | 1710 | AAACTCCATGTTCTCCGGTATGC | 23 | 9  |
| 49  | - | 1711 | AAACTCCATGTTCTCCGGTATG  | 22 | 10 |
| 65  | - | 1711 | AACTCCATGTTCTCCGGTATG   | 21 | 10 |
| 47  | - | 1713 | GAAACTCCATGTTCTCCGGTA   | 21 | 12 |
| 9   | - | 1714 | TGGAAACTCCATGTTCTCCGGT  | 22 | 13 |
| 26  | - | 1716 | GTGGAAACTCCATGTTCTCCG   | 21 | 15 |
| 2   | - | 1717 | AGGTGGAAACTCCATGTTCTCC  | 22 | 16 |
| 13  | - | 1718 | AGGTGGAAACTCCATGTTCTC   | 21 | 17 |
| 12  | - | 1721 | ACGAGGTGGAAACTCCATGTT   | 21 | 20 |
| 16  | - | 1733 | TAGTAACCTTAGACGAGGTGG   | 21 | 11 |
| 1   | - | 1733 | GTAGTAACCTTAGACGAGGTGG  | 22 | 11 |
| 5   | - | 1734 | GTAGTAACCTTAGACGAGGTG   | 21 | 12 |
| 5   | - | 1734 | TGTAGTAACCTTAGACGAGGTG  | 22 | 12 |
| 76  | - | 1735 | TGTAGTAACCTTAGACGAGGT   | 21 | 13 |
| 1   | - | 1736 | ACTGTAGTAACCTTAGACGAGG  | 22 | 14 |
| 83  | - | 1737 | ACTGTAGTAACCTTAGACGAG   | 21 | 15 |
| 94  | - | 1738 | CACTGTAGTAACCTTAGACGA   | 21 | 16 |
| 45  | - | 1739 | CCACTGTAGTAACCTTAGACG   | 21 | 17 |
| 73  | - | 1739 | CCCCTGTAGTAACCTTAGACG   | 22 | 17 |
| 16  | - | 1740 | CCCCTGTAGTAACCTTAGAC    | 21 | 18 |
| 4   | - | 1740 | TCCCCTGTAGTAACCTTAGAC   | 22 | 18 |
| 14  | - | 1741 | TCCCCTGTAGTAACCTTAGA    | 21 | 19 |
| 1   | - | 1741 | CTTCCCCTGTAGTAACCTTAGA  | 23 | 19 |
| 211 | - | 1741 | TTCCCCTGTAGTAACCTTAGA   | 22 | 19 |
| 4   | - | 1741 | GCTTCCCCTGTAGTAACCTTAGA | 24 | 19 |
| 63  | - | 1741 | CCCCTGTAGTAACCTTAGA     | 20 | 19 |
| 64  | - | 1742 | TTCCCCTGTAGTAACCTTAG    | 21 | 20 |
| 36  | - | 1743 | CTTCCCCTGTAGTAACCTTA    | 21 | 0  |
| 3   | - | 1743 | GCTTCCCCTGTAGTAACCTTA   | 22 | 0  |
| 28  | - | 1744 | GCTTCCCCTGTAGTAACCTT    | 21 | 1  |
| 7   | - | 1744 | TGCTTCCCCTGTAGTAACCTT   | 22 | 1  |
| 238 | - | 1745 | TGCTTCCCCTGTAGTAACCT    | 21 | 2  |
| 29  | - | 1745 | ATGCTTCCCCTGTAGTAACCT   | 22 | 2  |
| 21  | - | 1746 | ATGCTTCCCCTGTAGTAACC    | 21 | 3  |
| 75  | - | 1746 | TATGCTTCCCCTGTAGTAACC   | 22 | 3  |
| 153 | - | 1747 | TATGCTTCCCCTGTAGTAAC    | 21 | 4  |
| 6   | - | 1747 | TGCTTCCCCTGTAGTAAC      | 19 | 4  |

|     |   |      |                         |    |    |
|-----|---|------|-------------------------|----|----|
| 34  | - | 1748 | ATATGCTTCCCCTGTAGTAA    | 21 | 5  |
| 37  | - | 1748 | GATATGCTTCCCCTGTAGTAA   | 22 | 5  |
| 23  | - | 1749 | GATATGCTTCCCCTGTAGTA    | 21 | 6  |
| 4   | - | 1750 | GATATGCTTCCCCTGTAGT     | 20 | 7  |
| 8   | - | 1750 | CGGATATGCTTCCCCTGTAGT   | 22 | 7  |
| 10  | - | 1751 | TCGGATATGCTTCCCCTGTAG   | 22 | 8  |
| 16  | - | 1752 | CTCGGATATGCTTCCCCTGTAA  | 22 | 9  |
| 262 | - | 1752 | TCGGATATGCTTCCCCTGTAA   | 21 | 9  |
| 3   | - | 1753 | CTCGGATATGCTTCCCCTGT    | 21 | 10 |
| 4   | - | 1753 | CCTCGGATATGCTTCCCCTGT   | 22 | 10 |
| 12  | - | 1754 | CCTCGGATATGCTTCCCCTG    | 21 | 11 |
| 14  | - | 1755 | TCCTCGGATATGCTTCCCCT    | 21 | 12 |
| 2   | - | 1755 | CTCCTCGGATATGCTTCCCCT   | 22 | 12 |
| 12  | - | 1756 | CTCCTCGGATATGCTTCCCAC   | 21 | 13 |
| 14  | - | 1757 | TCTCCTCGGATATGCTTCCCA   | 21 | 14 |
| 186 | - | 1758 | CTTCTCCTCGGATATGCTTCCC  | 22 | 15 |
| 19  | - | 1758 | TTCTCCTCGGATATGCTTCCC   | 21 | 15 |
| 2   | - | 1759 | ACTTCTCCTCGGATATGCTTCC  | 22 | 16 |
| 4   | - | 1759 | CTTCTCCTCGGATATGCTTCC   | 21 | 16 |
| 5   | - | 1760 | ACTTCTCCTCGGATATGCTTC   | 21 | 17 |
| 10  | - | 1761 | GACTTCTCCTCGGATATGCTT   | 21 | 18 |
| 14  | - | 1762 | AAGACTTCTCCTCGGATATGCT  | 22 | 19 |
| 317 | - | 1762 | AGACTTCTCCTCGGATATGCT   | 21 | 19 |
| 65  | - | 1763 | AAGACTTCTCCTCGGATATGC   | 21 | 20 |
| 24  | - | 1764 | AAAGACTTCTCCTCGGATATG   | 21 | 0  |
| 241 | - | 1768 | AAGAGAAAGACTTCTCCTCGGA  | 22 | 4  |
| 29  | - | 1768 | AGAGAAAGACTTCTCCTCGGA   | 21 | 4  |
| 16  | - | 1778 | GTAAAGTTAAAGAGAAAGACT   | 21 | 14 |
| 8   | - | 1779 | GGTAAAGTTAAAGAGAAAGAC   | 21 | 15 |
| 5   | - | 1780 | AGGTTAAAGTTAAAGAGAAAGA  | 21 | 16 |
| 8   | - | 1782 | TCCAGGTTAAAGTTAAAGAGAAA | 22 | 18 |
| 10  | - | 1783 | TTCCAGGTTAAAGTTAAAGAGAA | 22 | 19 |
| 53  | - | 1783 | TCCAGGTTAAAGTTAAAGAGAA  | 21 | 19 |
| 145 | - | 1784 | TTCCAGGTTAAAGTTAAAGAGA  | 21 | 20 |
| 14  | - | 1784 | ATTCCAGGTTAAAGTTAAAGAGA | 22 | 20 |
| 1   | - | 1784 | TCCAGGTTAAAGTTAAAGAGA   | 20 | 20 |
| 34  | - | 1785 | ATTCCAGGTTAAAGTTAAAGAG  | 21 | 0  |
| 2   | - | 1786 | TATTCCAGGTTAAAGTTAAAGA  | 21 | 1  |
| 11  | - | 1787 | ATATTCCAGGTTAAAGTTAAG   | 21 | 2  |
| 35  | - | 1789 | AGATATTCCAGGTTAAAGTTA   | 21 | 4  |
| 44  | - | 1790 | AAGATATTCCAGGTTAAAGTTT  | 21 | 5  |
| 7   | - | 1791 | CAAGATATTCCAGGTTAAGTT   | 21 | 6  |
| 44  | - | 1792 | ACAAGATATTCCAGGTTAAGT   | 21 | 7  |
| 142 | - | 1796 | TTCGACAAGATATTCCAGGTT   | 21 | 11 |

|     |   |      |                        |    |    |
|-----|---|------|------------------------|----|----|
| 27  | - | 1797 | GTTCGACAAGATATTCCAGGT  | 21 | 12 |
| 4   | - | 1797 | AGTTCGACAAGATATTCCAGGT | 22 | 12 |
| 25  | - | 1798 | AAGTTCGACAAGATATTCCAGG | 22 | 13 |
| 30  | - | 1801 | TCAAGTTCGACAAGATATTCC  | 21 | 16 |
| 10  | - | 1806 | TCCATATCAAGTTCGACAAGAT | 22 | 0  |
| 112 | - | 1807 | TCCATATCAAGTTCGACAAGA  | 22 | 1  |
| 25  | - | 1808 | TTCCATATCAAGTTCGACAAG  | 21 | 2  |
| 2   | - | 1809 | CTTCCATATCAAGTTCGACAA  | 21 | 3  |
| 7   | - | 1810 | CTTCCATATCAAGTTCGACA   | 20 | 4  |
| 3   | - | 1811 | ACCTTCCATATCAAGTTCGAC  | 21 | 5  |
| 3   | - | 1812 | TACCTTCCATATCAAGTTCGA  | 21 | 6  |
| 3   | - | 1815 | GGCTACCTTCCATATCAAGTT  | 21 | 9  |
| 7   | - | 1820 | CGAGCAGGCTACCTTCCATATC | 22 | 14 |
| 28  | - | 1824 | TCTCGAGCAGGCTACCTTCCA  | 21 | 18 |
| 26  | - | 1825 | TTCTCGAGCAGGCTACCTTCC  | 21 | 19 |
| 37  | - | 1825 | CTTCTCGAGCAGGCTACCTTCC | 22 | 19 |
| 159 | - | 1826 | CTTCTCGAGCAGGCTACCTTC  | 21 | 20 |
| 8   | - | 1832 | CCCATAGCTTCTCGAGCAGGCT | 22 | 5  |
| 4   | - | 1833 | TCCCATAGCTTCTCGAGCAGGC | 22 | 6  |
| 6   | - | 1833 | CCCATAGCTTCTCGAGCAGGC  | 21 | 6  |
| 6   | - | 1834 | TCCCATAGCTTCTCGAGCAGG  | 21 | 7  |
| 1   | - | 1838 | TCCATCCCATAGCTTCTCGAG  | 21 | 11 |
| 1   | - | 1838 | TTCCATCCCATAGCTTCTCGAG | 22 | 11 |
| 98  | - | 1839 | TTCCATCCCATAGCTTCTCGA  | 21 | 12 |
| 4   | - | 1841 | AGTTCATCCCATAGCTTCTC   | 21 | 14 |
| 15  | - | 1861 | TTGAGATTTGCAAGGGGCTGA  | 21 | 13 |
| 25  | - | 1864 | TTCTTGAGATTTGCAAGGGC   | 21 | 16 |
| 9   | - | 1866 | TCTTCTTGAGATTTGCAAGGG  | 21 | 18 |
| 20  | - | 1869 | ACATCTTCTTGAGATTTGCAA  | 21 | 0  |
| 6   | - | 1875 | ACAAAGACATCTTCTTGAGAT  | 21 | 6  |
| 11  | - | 1878 | CTTGACAAAGACATCTTCTTGA | 22 | 9  |
| 13  | - | 1878 | TTGACAAAGACATCTTCTTGA  | 21 | 9  |
| 1   | - | 1879 | CTTGACAAAGACATCTTCTTG  | 21 | 10 |
| 6   | - | 1880 | ACTTGACAAAGACATCTTCTT  | 21 | 11 |
| 2   | - | 1887 | TACCATGAACTTGACAAAGACA | 22 | 18 |
| 171 | - | 1889 | ATACCATGAACTTGACAAAGA  | 21 | 20 |
| 13  | - | 1890 | AATACCATGAACTTGACAAAG  | 21 | 0  |
| 94  | - | 1892 | TAAATACCATGAACTTGACAA  | 21 | 2  |
| 2   | - | 1893 | TTTAAATACCATGAACTTGACA | 22 | 3  |
| 55  | - | 1893 | TTAAATACCATGAACTTGACA  | 21 | 3  |
| 21  | - | 1894 | TTTAAATACCATGAACTTGAC  | 21 | 4  |
| 103 | - | 1900 | AGTTTCTTTAAATACCATGAA  | 21 | 10 |
| 16  | - | 1901 | AAGTTTCTTTAAATACCATGA  | 21 | 11 |
| 1   | - | 1904 | CGGAAGTTTCTTTAAATACCA  | 21 | 14 |

|     |   |      |                         |    |    |
|-----|---|------|-------------------------|----|----|
| 50  | - | 1905 | TCCGGAAGTTTCTTTAAATACC  | 22 | 15 |
| 41  | - | 1906 | TCCGGAAGTTTCTTTAAATAC   | 21 | 16 |
| 10  | - | 1912 | GACAGATCCGGAAGTTTCTTT   | 21 | 1  |
| 16  | - | 1912 | TGACAGATCCGGAAGTTTCTTT  | 22 | 1  |
| 13  | - | 1913 | TTGACAGATCCGGAAGTTTCTT  | 22 | 2  |
| 231 | - | 1913 | TGACAGATCCGGAAGTTTCTT   | 21 | 2  |
| 24  | - | 1914 | TTGACAGATCCGGAAGTTTCT   | 21 | 3  |
| 1   | - | 1915 | ATTTGACAGATCCGGAAGTTTC  | 22 | 4  |
| 81  | - | 1915 | TTTGACAGATCCGGAAGTTTC   | 21 | 4  |
| 1   | - | 1916 | TTGACAGATCCGGAAGTTT     | 19 | 5  |
| 4   | - | 1916 | TTTGACAGATCCGGAAGTTT    | 20 | 5  |
| 5   | - | 1916 | CATTTGACAGATCCGGAAGTTT  | 22 | 5  |
| 779 | - | 1916 | ATTTGACAGATCCGGAAGTTT   | 21 | 5  |
| 29  | - | 1917 | CATTTGACAGATCCGGAAGTT   | 21 | 6  |
| 7   | - | 1917 | TTTGACAGATCCGGAAGTT     | 19 | 6  |
| 109 | - | 1918 | GCATTTGACAGATCCGGAAGT   | 21 | 7  |
| 5   | - | 1918 | TAGCATTTGACAGATCCGGAAGT | 23 | 7  |
| 23  | - | 1919 | TAGCATTTGACAGATCCGGAAG  | 22 | 8  |
| 72  | - | 1920 | TAGCATTTGACAGATCCGGAA   | 21 | 9  |
| 144 | - | 1921 | GTAGCATTTGACAGATCCGGA   | 21 | 10 |
| 55  | - | 1921 | TGTAGCATTTGACAGATCCGGA  | 22 | 10 |
| 18  | - | 1922 | TTGTAGCATTTGACAGATCCGG  | 22 | 11 |
| 31  | - | 1922 | TGTAGCATTTGACAGATCCGG   | 21 | 11 |
| 20  | - | 1923 | TTTGTAGCATTTGACAGATCCG  | 22 | 12 |
| 455 | - | 1923 | TTGTAGCATTTGACAGATCCG   | 21 | 12 |
| 97  | - | 1924 | TTTGTAGCATTTGACAGATCC   | 21 | 13 |
| 1   | - | 1926 | AGATTTGTAGCATTTGACAGAT  | 22 | 15 |
| 9   | - | 1926 | GATTTGTAGCATTTGACAGAT   | 21 | 15 |
| 1   | - | 1927 | GATTTGTAGCATTTGACAGA    | 20 | 16 |
| 50  | - | 1927 | GAGATTTGTAGCATTTGACAGA  | 22 | 16 |
| 758 | - | 1927 | AGATTTGTAGCATTTGACAGA   | 21 | 16 |
| 14  | - | 1928 | GAGATTTGTAGCATTTGACAG   | 21 | 17 |
| 1   | - | 1929 | TCGAGATTTGTAGCATTTGACA  | 22 | 18 |
| 273 | - | 1930 | TCGAGATTTGTAGCATTTGAC   | 21 | 19 |
| 352 | - | 1931 | TTCGAGATTTGTAGCATTTGA   | 21 | 20 |
| 35  | - | 1931 | CTTCGAGATTTGTAGCATTTGA  | 22 | 20 |
| 3   | - | 1933 | TTCTTCGAGATTTGTAGCATTT  | 22 | 1  |
| 6   | - | 1933 | TCTTCGAGATTTGTAGCATTT   | 21 | 1  |
| 10  | - | 1934 | ATTCTTCGAGATTTGTAGCATT  | 22 | 2  |
| 238 | - | 1934 | TTCTTCGAGATTTGTAGCATT   | 21 | 2  |
| 189 | - | 1935 | ATTCTTCGAGATTTGTAGCAT   | 21 | 3  |
| 193 | - | 1936 | AATTCTTCGAGATTTGTAGCA   | 21 | 4  |
| 7   | - | 1936 | CAATTCTTCGAGATTTGTAGCA  | 22 | 4  |
| 11  | - | 1937 | CAATTCTTCGAGATTTGTAGC   | 21 | 5  |



|     |   |      |                        |    |    |
|-----|---|------|------------------------|----|----|
| 16  | - | 1939 | TCCAATTCTTCGAGATTTGTA  | 21 | 7  |
| 6   | - | 1942 | AGATCCAATTCTTCGAGATTT  | 21 | 10 |
| 173 | - | 1944 | TCAGATCCAATTCTTCGAGAT  | 21 | 12 |
| 11  | - | 1945 | CTCAGATCCAATTCTTCGAGA  | 21 | 13 |
| 9   | - | 1947 | CTCTCAGATCCAATTCTTCGA  | 21 | 15 |
| 31  | - | 1955 | CTGGCAAGCTCTCAGATCCAA  | 21 | 2  |
| 16  | - | 1956 | TCTGGCAAGCTCTCAGATCCA  | 21 | 3  |
| 105 | - | 1960 | TAAATTCTGGCAAGCTCTCAGA | 22 | 7  |
| 112 | - | 1960 | AAATTCTGGCAAGCTCTCAGA  | 21 | 7  |
| 1   | - | 1960 | AATTCTGGCAAGCTCTCAGA   | 20 | 7  |
| 19  | - | 1963 | ACTAAATTCTGGCAAGCTCTC  | 21 | 10 |
| 20  | - | 1963 | TACTAAATTCTGGCAAGCTCTC | 22 | 10 |
| 42  | - | 1964 | TACTAAATTCTGGCAAGCTCT  | 21 | 11 |
| 2   | - | 1965 | TCTACTAAATTCTGGCAAGCTC | 22 | 12 |
| 5   | - | 1965 | CTACTAAATTCTGGCAAGCTC  | 21 | 12 |
| 23  | - | 1966 | TCTACTAAATTCTGGCAAGCT  | 21 | 13 |
| 8   | - | 1966 | CTACTAAATTCTGGCAAGCT   | 20 | 13 |
| 21  | - | 1969 | AGCTCTACTAAATTCTGGCAA  | 21 | 16 |
| 12  | - | 1970 | CTCTACTAAATTCTGGCA     | 18 | 17 |
| 68  | - | 1970 | AAGCTCTACTAAATTCTGGCA  | 21 | 17 |
| 18  | - | 1971 | GAAGCTCTACTAAATTCTGGC  | 21 | 18 |
| 5   | - | 1972 | GGAAGCTCTACTAAATTCTGG  | 21 | 19 |
| 36  | - | 1974 | AAGGAAGCTCTACTAAATTCT  | 21 | 0  |
| 1   | - | 1976 | AAGGAAGCTCTACTAAATT    | 19 | 2  |
| 16  | - | 1980 | AGGAGGAAGGAAGCTCTACTA  | 21 | 6  |
| 7   | - | 1981 | AAGGAGGAAGGAAGCTCTACT  | 21 | 7  |
| 9   | - | 1983 | AAAAGGAGGAAGGAAGCTCTA  | 21 | 9  |
| 227 | - | 1985 | AGAAAAGGAGGAAGGAAGCTC  | 21 | 11 |
| 2   | - | 1986 | AAGAAAAGGAGGAAGGAAGCT  | 21 | 12 |
| 65  | - | 1987 | TAAGAAAAGGAGGAAGGAAGC  | 21 | 13 |
| 11  | - | 1988 | ATAAGAAAAGGAGGAAGGAAG  | 21 | 14 |
| 4   | - | 1988 | GATAAGAAAAGGAGGAAGGAAG | 22 | 14 |
| 69  | - | 1990 | AGATAAGAAAAGGAGGAAGGA  | 21 | 16 |
| 2   | - | 1992 | TGCAGATAAGAAAAGGAGGAAG | 22 | 18 |
| 43  | - | 1993 | TGCAGATAAGAAAAGGAGGAA  | 21 | 19 |
| 120 | - | 1994 | ATGCAGATAAGAAAAGGAGGA  | 21 | 20 |
| 7   | - | 1995 | TTATGCAGATAAGAAAAGGAGG | 22 | 0  |
| 14  | - | 1996 | TTATGCAGATAAGAAAAGGAG  | 21 | 1  |
| 2   | - | 1996 | CTTATGCAGATAAGAAAAGGAG | 22 | 1  |
| 24  | - | 2006 | ATACTTTAGCTTATGCAGATA  | 21 | 11 |
| 27  | - | 2007 | AATACTTTAGCTTATGCAGAT  | 21 | 12 |
| 7   | - | 2014 | CATATTCAAATACTTTAGCTTA | 22 | 19 |
| 55  | - | 2015 | CATATTCAAATACTTTAGCTT  | 21 | 20 |
| 3   | - | 2017 | ATCATATTCAAATACTTTAGC  | 21 | 1  |

|     |   |      |                         |    |    |
|-----|---|------|-------------------------|----|----|
| 64  | - | 2035 | TTTAGCCTTCTGCATCCCATC   | 21 | 19 |
| 2   | - | 2038 | TTCTTTTAGCCTTCTGCATCCC  | 22 | 1  |
| 2   | - | 2039 | CTTCTTTTAGCCTTCTGCATCC  | 22 | 2  |
| 31  | - | 2042 | AACTTCTTTTAGCCTTCTGCA   | 21 | 5  |
| 5   | - | 2045 | TGGAACTTCTTTTAGCCTTCT   | 21 | 8  |
| 6   | - | 2047 | GGTGGAACTTCTTTTAGCCTT   | 21 | 10 |
| 4   | - | 2049 | GAGGTGGAACTTCTTTTAGCC   | 21 | 12 |
| 6   | - | 2049 | AGGTGGAACTTCTTTTAGCC    | 20 | 12 |
| 29  | - | 2050 | TGAGGTGGAACTTCTTTTAGC   | 21 | 13 |
| 11  | - | 2052 | TATGAGGTGGAACTTCTTTTA   | 21 | 15 |
| 54  | - | 2055 | TTGATATGAGGTGGAACTTCTT  | 22 | 18 |
| 22  | - | 2056 | TTGATATGAGGTGGAACTTCT   | 21 | 19 |
| 4   | - | 2058 | AGTTGATATGAGGTGGAACTT   | 21 | 0  |
| 54  | - | 2059 | CAAGTTGATATGAGGTGGAACT  | 22 | 1  |
| 75  | - | 2059 | AAGTTGATATGAGGTGGAACT   | 21 | 1  |
| 170 | - | 2061 | TCAAGTTGATATGAGGTGGAA   | 21 | 3  |
| 29  | - | 2062 | TTCAAGTTGATATGAGGTGGA   | 21 | 4  |
| 1   | - | 2063 | TTCAAGTTGATATGAGGTGG    | 20 | 5  |
| 79  | - | 2065 | GACTTCAAGTTGATATGAGGT   | 21 | 7  |
| 39  | - | 2068 | AGAGACTTCAAGTTGATATGA   | 21 | 10 |
| 8   | - | 2069 | AAGAGACTTCAAGTTGATATG   | 21 | 11 |
| 42  | - | 2073 | ATTCAAGAGACTTCAAGTTGA   | 21 | 15 |
| 14  | - | 2075 | AATCAAGAGACTTCAAGTT     | 20 | 17 |
| 1   | - | 2077 | ACCAATTCAAGAGACTTCAAG   | 21 | 19 |
| 10  | - | 2080 | TTGACCAATTCAAGAGACTTC   | 21 | 1  |
| 22  | - | 2083 | ATGTTGACCAATTCAAGAGAC   | 21 | 4  |
| 40  | - | 2084 | CATGTTGACCAATTCAAGAGA   | 21 | 5  |
| 20  | - | 2085 | ACATGTTGACCAATTCAAGAG   | 21 | 6  |
| 17  | - | 2086 | TACATGTTGACCAATTCAAGA   | 21 | 7  |
| 58  | - | 2086 | ATACATGTTGACCAATTCAAGA  | 22 | 7  |
| 35  | - | 2087 | ATACATGTTGACCAATTCAAG   | 21 | 8  |
| 3   | - | 2088 | CATACATGTTGACCAATTCAA   | 21 | 9  |
| 3   | - | 2094 | AGCATCCATACATGTTGACCA   | 21 | 15 |
| 1   | - | 2097 | TTGAGCATCCATACATGTTGA   | 21 | 18 |
| 74  | - | 2099 | TCTTGAGCATCCATACATGTT   | 21 | 20 |
| 9   | - | 2099 | ATCTTGAGCATCCATACATGTT  | 22 | 20 |
| 5   | - | 2100 | TAATCTTGAGCATCCATACATGT | 23 | 0  |
| 97  | - | 2100 | ATCTTGAGCATCCATACATGT   | 21 | 0  |
| 103 | - | 2103 | TTAATCTTGAGCATCCATACA   | 22 | 3  |
| 2   | - | 2103 | AATCTTGAGCATCCATACA     | 19 | 3  |
| 8   | - | 2103 | TTAATCTTGAGCATCCATACA   | 21 | 3  |
| 12  | - | 2108 | CTTTTAATCTTGAGCATCC     | 20 | 8  |
| 7   | - | 2111 | AAAGCTTTTAATCTTGAGCA    | 21 | 11 |
| 5   | - | 2113 | TGGAAAGCTTTTAATCTTGAG   | 22 | 13 |

|     |   |      |                         |    |    |
|-----|---|------|-------------------------|----|----|
| 6   | - | 2113 | GGAAAGCTTTTTAATCTTGAG   | 21 | 13 |
| 4   | - | 2114 | TGGAAAGCTTTTTAATCTTGA   | 21 | 14 |
| 6   | - | 2116 | TCTGGAAAGCTTTTTAATCTT   | 21 | 16 |
| 2   | - | 2120 | AATATCTGGAAAGCTTTTTAA   | 21 | 20 |
| 28  | - | 2125 | GTAGAAATATCTGGAAAGCTT   | 21 | 4  |
| 7   | - | 2125 | TGTAGAAATATCTGGAAAGCTT  | 22 | 4  |
| 4   | - | 2126 | TGTAGAAATATCTGGAAAGCT   | 21 | 5  |
| 21  | - | 2127 | TTTGTAGAAATATCTGGAAAGC  | 22 | 6  |
| 3   | - | 2127 | TTGTAGAAATATCTGGAAAGC   | 21 | 6  |
| 16  | - | 2128 | TTTGTAGAAATATCTGGAAAG   | 21 | 7  |
| 13  | - | 2129 | GTTTGTAGAAATATCTGGAAA   | 21 | 8  |
| 5   | - | 2129 | TGTTTGTAGAAATATCTGGAAA  | 22 | 8  |
| 179 | - | 2130 | TGTTTGTAGAAATATCTGGAA   | 21 | 9  |
| 10  | - | 2131 | ATGTTTGTAGAAATATCTGGA   | 21 | 10 |
| 104 | - | 2136 | AACTGATGTTTGTAGAAATAT   | 21 | 15 |
| 5   | - | 2136 | ACTGATGTTTGTAGAAATAT    | 20 | 15 |
| 2   | - | 2137 | GAAGTATGTTTGTAGAAATA    | 21 | 16 |
| 15  | - | 2139 | AGTGAAGTATGTTTGTAGAAA   | 22 | 18 |
| 4   | - | 2139 | GTGAAGTATGTTTGTAGAAA    | 21 | 18 |
| 1   | - | 2140 | GTGAAGTATGTTTGTAGAA     | 20 | 19 |
| 357 | - | 2140 | AGTGAAGTATGTTTGTAGAA    | 21 | 19 |
| 70  | - | 2141 | GAGTGAAGTATGTTTGTAGA    | 21 | 20 |
| 42  | - | 2143 | TCGAGTGAAGTATGTTTGTGA   | 21 | 1  |
| 82  | - | 2145 | TGTCGAGTGAAGTATGTTTG    | 21 | 3  |
| 115 | - | 2147 | TATGTTCGAGTGAAGTATGTT   | 21 | 5  |
| 16  | - | 2147 | ATATGTTCGAGTGAAGTATGTT  | 22 | 5  |
| 158 | - | 2148 | ATATGTTCGAGTGAAGTATGT   | 21 | 6  |
| 8   | - | 2149 | TGATATGTTCGAGTGAAGTATG  | 22 | 7  |
| 29  | - | 2150 | ATGATATGTTCGAGTGAAGTAT  | 22 | 8  |
| 67  | - | 2150 | TGATATGTTCGAGTGAAGTAT   | 21 | 8  |
| 173 | - | 2151 | ATGATATGTTCGAGTGAAGTGA  | 21 | 9  |
| 9   | - | 2151 | TATGATATGTTCGAGTGAAGTGA | 22 | 9  |
| 2   | - | 2155 | GTGTATGATATGTTCGAGTGAA  | 21 | 13 |
| 1   | - | 2156 | GTGTATGATATGTTCGAGTGA   | 20 | 14 |
| 91  | - | 2156 | AGTGTATGATATGTTCGAGTGA  | 21 | 14 |
| 37  | - | 2157 | CAGTGTATGATATGTTCGAGTG  | 21 | 15 |
| 57  | - | 2157 | TCAGTGTATGATATGTTCGAGTG | 22 | 15 |
| 272 | - | 2158 | TCAGTGTATGATATGTTCGAGT  | 21 | 16 |
| 5   | - | 2159 | ATCAGTGTATGATATGTTCGAG  | 21 | 17 |
| 8   | - | 2159 | TCAGTGTATGATATGTTCGAG   | 20 | 17 |
| 4   | - | 2160 | CATCAGTGTATGATATGTTCGA  | 21 | 18 |
| 6   | - | 2161 | ACATCAGTGTATGATATGTTCG  | 21 | 19 |
| 2   | - | 2175 | CAGGTAGTTCTTCCACATCAG   | 21 | 12 |
| 20  | - | 2182 | ATTGATTCAGGTAGTTCTTCC   | 21 | 19 |

|     |   |      |                         |    |    |
|-----|---|------|-------------------------|----|----|
| 3   | - | 2182 | CATTGATTCAGGTAGTTCTTCC  | 22 | 19 |
| 39  | - | 2184 | TCATTGATTCAGGTAGTTCTT   | 21 | 0  |
| 162 | - | 2187 | TCGTCATTGATTCAGGTAGTT   | 21 | 3  |
| 14  | - | 2190 | ACATCGTCATTGATTCAGGTA   | 21 | 6  |
| 24  | - | 2191 | CACATCGTCATTGATTCAGGT   | 21 | 7  |
| 11  | - | 2192 | ACCACATCGTCATTGATTCAGG  | 22 | 8  |
| 37  | - | 2193 | ACCACATCGTCATTGATTCAG   | 21 | 9  |
| 7   | - | 2193 | AGACCACATCGTCATTGATTCAG | 23 | 9  |
| 1   | - | 2197 | CGAGACCACATCGTCATTGAT   | 21 | 13 |
| 9   | - | 2204 | ACGTAGGCGAGACCACATCGT   | 21 | 20 |
| 7   | - | 2205 | TACGTAGGCGAGACCACATCG   | 21 | 0  |
| 15  | - | 2209 | AGAGTACGTAGGCGAGACCAC   | 21 | 4  |
| 6   | - | 2211 | TCGAGAGTACGTAGGCGAGACC  | 22 | 6  |
| 261 | - | 2213 | TTTCGAGAGTACGTAGGCGAGA  | 22 | 8  |
| 92  | - | 2213 | TTTCGAGAGTACGTAGGCGAGA  | 21 | 8  |
| 40  | - | 2214 | TTTCGAGAGTACGTAGGCGAG   | 21 | 9  |
| 21  | - | 2215 | ATTTTCGAGAGTACGTAGGCGA  | 21 | 10 |
| 5   | - | 2215 | TATTTTCGAGAGTACGTAGGCGA | 22 | 10 |
| 2   | - | 2216 | ATATTTTCGAGAGTACGTAGGCG | 22 | 11 |
| 47  | - | 2216 | TATTTTCGAGAGTACGTAGGCG  | 21 | 11 |
| 70  | - | 2217 | ATATTTTCGAGAGTACGTAGGC  | 21 | 12 |
| 62  | - | 2218 | TATATTTTCGAGAGTACGTAGG  | 21 | 13 |
| 13  | - | 2221 | TTGTATATTTTCGAGAGTACGT  | 21 | 16 |
| 8   | - | 2226 | TACTTTTGTATATTTTCGAGAG  | 21 | 0  |
| 7   | - | 2229 | TTCTACTTTTGTATATTTTCGA  | 21 | 3  |
| 12  | - | 2242 | ACTATCTTGAGGTTTCTACTT   | 21 | 16 |
| 6   | - | 2245 | TGTTACTATCTTGAGGTTTCTA  | 22 | 19 |
| 11  | - | 2246 | TGTTACTATCTTGAGGTTTCT   | 21 | 20 |
| 8   | - | 2247 | TGTGTTACTATCTTGAGGTTTC  | 22 | 0  |
| 68  | - | 2248 | TGTGTTACTATCTTGAGGTTT   | 21 | 1  |
| 46  | - | 2250 | CATGTGTTACTATCTTGAGGT   | 21 | 3  |
| 1   | - | 2251 | CACATGTGTTACTATCTTGAGG  | 22 | 4  |
| 6   | - | 2251 | ACATGTGTTACTATCTTGAGG   | 21 | 4  |
| 92  | - | 2252 | CACATGTGTTACTATCTTGAG   | 21 | 5  |
| 2   | - | 2253 | GCACATGTGTTACTATCTTGA   | 21 | 6  |
| 138 | - | 2260 | TTTAGGGGCACATGTGTTACT   | 21 | 13 |
| 7   | - | 2264 | TAGGTTTAGGGGCACATGTGT   | 21 | 17 |
| 6   | - | 2265 | TTAGGTTTAGGGGCACATGTG   | 21 | 18 |
| 3   | - | 2270 | ATATGTTAGGTTTAGGGGCAC   | 21 | 2  |
| 1   | - | 2271 | AGATATGTTAGGTTTAGGGGCA  | 22 | 3  |
| 3   | - | 2271 | GATATGTTAGGTTTAGGGGCA   | 21 | 3  |
| 44  | - | 2272 | AGATATGTTAGGTTTAGGGGC   | 21 | 4  |
| 6   | - | 2273 | TAGATATGTTAGGTTTAGGGG   | 21 | 5  |
| 8   | - | 2275 | TCTAGATATGTTAGGTTTAGG   | 21 | 7  |

|     |   |      |                          |    |    |
|-----|---|------|--------------------------|----|----|
| 1   | - | 2278 | TGAGGTCTAGATATGTTAGGTTT  | 23 | 10 |
| 6   | - | 2278 | GAGGTCTAGATATGTTAGGTTT   | 22 | 10 |
| 10  | - | 2279 | GAGGTCTAGATATGTTAGGTT    | 21 | 11 |
| 35  | - | 2280 | TGAGGTCTAGATATGTTAGGT    | 21 | 12 |
| 4   | - | 2281 | CTGAGGTCTAGATATGTTAGG    | 21 | 13 |
| 8   | - | 2281 | GGTCTAGATATGTTAGG        | 17 | 13 |
| 55  | - | 2284 | TCGCTGAGGTCTAGATATGTT    | 21 | 16 |
| 1   | - | 2286 | TCTCGCTGAGGTCTAGATATG    | 21 | 18 |
| 35  | - | 2293 | ATTCTAGTCTCGCTGAGGTCT    | 21 | 4  |
| 39  | - | 2293 | AATTCTAGTCTCGCTGAGGTCT   | 22 | 4  |
| 16  | - | 2294 | AATTCTAGTCTCGCTGAGGTC    | 21 | 5  |
| 12  | - | 2295 | AATTCTAGTCTCGCTGAGGT     | 20 | 6  |
| 36  | - | 2295 | CAATTCTAGTCTCGCTGAGGT    | 21 | 6  |
| 38  | - | 2295 | TCAATTCTAGTCTCGCTGAGGT   | 22 | 6  |
| 123 | - | 2296 | TCAATTCTAGTCTCGCTGAGG    | 21 | 7  |
| 29  | - | 2297 | CTCAATTCTAGTCTCGCTGAG    | 21 | 8  |
| 18  | - | 2298 | TTCTCAATTCTAGTCTCGCTGA   | 22 | 9  |
| 87  | - | 2298 | TCTCAATTCTAGTCTCGCTGA    | 21 | 9  |
| 5   | - | 2299 | TTCTCAATTCTAGTCTCGCTG    | 21 | 10 |
| 25  | - | 2301 | TCTTCTCAATTCTAGTCTCGC    | 21 | 12 |
| 4   | - | 2301 | ATCTTCTCAATTCTAGTCTCGC   | 22 | 12 |
| 21  | - | 2302 | ATCTTCTCAATTCTAGTCTCG    | 21 | 13 |
| 23  | - | 2302 | AATCTTCTCAATTCTAGTCTCG   | 22 | 13 |
| 3   | - | 2303 | AATCTTCTCAATTCTAGTCTC    | 21 | 14 |
| 12  | - | 2311 | TCATCTGGAATCTTCTCAATT    | 21 | 1  |
| 23  | - | 2317 | TTGATGTCATCTGGAATCTTC    | 21 | 7  |
| 27  | - | 2317 | TTTGTGATGTCATCTGGAATCTTC | 22 | 7  |
| 25  | - | 2321 | ATTTTTGATGTCATCTGGAAT    | 21 | 11 |
| 35  | - | 2324 | AACATTTTTGATGTCATCTGG    | 21 | 14 |
| 7   | - | 2330 | CCCATGAACATTTTTGATGTC    | 21 | 20 |
| 20  | - | 2336 | TTGCAGCCCATGAACATTTTT    | 21 | 5  |
| 13  | - | 2337 | TTTGCAGCCCATGAACATTTTT   | 21 | 6  |
| 26  | - | 2337 | ATTTGCAGCCCATGAACATTTTT  | 22 | 6  |
| 4   | - | 2338 | ATTTGCAGCCCATGAACATTT    | 21 | 7  |
| 13  | - | 2344 | AATAAAATTTGCAGCCCATGA    | 21 | 13 |
| 99  | - | 2365 | AGTTTTCTGCAGCCACCTAGA    | 21 | 13 |
| 13  | - | 2372 | TGATGCGAGTTTTCTGCAGCC    | 21 | 20 |
| 1   | - | 2378 | TGGCAATGATGCGAGTTTTCT    | 21 | 5  |
| 46  | - | 2382 | GCTCTGGCAATGATGCGAGTT    | 21 | 9  |
| 22  | - | 2384 | AAGCTCTGGCAATGATGCGAG    | 21 | 11 |
| 6   | - | 2386 | GGAAGCTCTGGCAATGATGCG    | 21 | 13 |
| 10  | - | 2387 | AGGAAGCTCTGGCAATGATGC    | 21 | 14 |
| 24  | - | 2394 | GCGAACCAGGAAGCTCTGGCA    | 21 | 0  |
| 4   | - | 2402 | GTACAAGAGCGAACCAGGAAG    | 21 | 8  |

|     |   |      |                        |    |    |
|-----|---|------|------------------------|----|----|
| 4   | - | 2403 | AGTACAAGAGCGAACCAGGAA  | 21 | 9  |
| 36  | - | 2404 | AAGTACAAGAGCGAACCAGGA  | 21 | 10 |
| 42  | - | 2404 | TAAGTACAAGAGCGAACCAGGA | 22 | 10 |
| 6   | - | 2405 | ATAAGTACAAGAGCGAACCAGG | 22 | 11 |
| 6   | - | 2405 | TAAGTACAAGAGCGAACCAGG  | 21 | 11 |
| 3   | - | 2408 | CTGATAAGTACAAGAGCGAACC | 22 | 14 |
| 4   | - | 2408 | TGATAAGTACAAGAGCGAACC  | 21 | 14 |
| 1   | - | 2412 | TTTGCTGATAAGTACAAGAGCG | 22 | 18 |
| 36  | - | 2413 | TTTGCTGATAAGTACAAGAGC  | 21 | 19 |
| 46  | - | 2415 | TCGTTTGCTGATAAGTACAAGA | 22 | 0  |
| 3   | - | 2416 | TCGTTTGCTGATAAGTACAAG  | 21 | 1  |
| 7   | - | 2418 | ACTCGTTTGCTGATAAGTACA  | 21 | 3  |
| 17  | - | 2425 | GATTCACACTCGTTTGCTGAT  | 21 | 10 |
| 123 | - | 2426 | TGATTCACACTCGTTTGCTGA  | 21 | 11 |
| 6   | - | 2428 | AGTGATTCACACTCGTTTGCT  | 21 | 13 |
| 4   | - | 2434 | CTCTCAAGTGATTCACACTCG  | 21 | 19 |
| 33  | - | 2443 | CAAGATACGCTCTCAAGTGAT  | 21 | 7  |
| 93  | - | 2453 | ATTAAGAGGGCAAGATACGCT  | 21 | 17 |
| 5   | - | 2463 | TGTATGAAGTATTAAGAGGGC  | 21 | 6  |
| 28  | - | 2464 | ATGTATGAAGTATTAAGAGGG  | 21 | 7  |
| 34  | - | 2472 | TGAGTTCCATGTATGAAGTAT  | 21 | 15 |
| 40  | - | 2476 | AAGCTGAGTTCCATGTATGAA  | 21 | 19 |
| 7   | - | 2478 | TGAAGCTGAGTTCCATGTATG  | 21 | 0  |
| 1   | - | 2480 | GGTGAAGCTGAGTTCCATGTA  | 21 | 2  |
| 3   | - | 2492 | TTTGAAGCAGTTGGTGAAGCT  | 21 | 14 |
| 229 | - | 2493 | AGTTTGAAGCAGTTGGTGAAGC | 22 | 15 |
| 4   | - | 2494 | AGTTTGAAGCAGTTGGTGAAG  | 21 | 16 |
| 23  | - | 2495 | TAGTTTGAAGCAGTTGGTGAA  | 21 | 17 |
| 1   | - | 2496 | TTTAGTTTGAAGCAGTTGGTGA | 22 | 18 |
| 53  | - | 2497 | TTTAGTTTGAAGCAGTTGGTG  | 21 | 19 |
| 9   | - | 2499 | GGTTTAGTTTGAAGCAGTTGG  | 21 | 0  |
| 27  | - | 2501 | TTGGTTTAGTTTGAAGCAGTT  | 21 | 2  |
| 6   | - | 2502 | TCTTGGTTTAGTTTGAAGCAGT | 22 | 3  |
| 7   | - | 2503 | TCTTGGTTTAGTTTGAAGCAG  | 21 | 4  |
| 10  | - | 2504 | TTCTTGGTTTAGTTTGAAGCA  | 21 | 5  |
| 5   | - | 2507 | TGCTTCTTGGTTTAGTTTGA   | 21 | 8  |
| 3   | - | 2508 | CGTGCTTCTTGGTTTAGTTTGA | 22 | 9  |
| 23  | - | 2511 | TGCGTGCTTCTTGGTTTAGTT  | 21 | 12 |
| 4   | - | 2515 | CCTCTGCGTGCTTCTTGGTTT  | 21 | 16 |
| 27  | - | 2516 | TCCTCTGCGTGCTTCTTGGTT  | 21 | 17 |
| 7   | - | 2516 | TTCTCTGCGTGCTTCTTGGTT  | 22 | 17 |
| 5   | - | 2517 | ATTCCTCTGCGTGCTTCTTGGT | 22 | 18 |
| 80  | - | 2518 | ATTCCTCTGCGTGCTTCTTGG  | 21 | 19 |
| 11  | - | 2521 | ATAATTCCTCTGCGTGCTTCT  | 21 | 1  |

|     |   |      |                         |    |    |
|-----|---|------|-------------------------|----|----|
| 9   | - | 2524 | TGAATAATTCCTCTGCGTGCT   | 21 | 4  |
| 14  | - | 2526 | GTTGAATAATTCCTCTGCGTG   | 21 | 6  |
| 1   | - | 2527 | TGTTGAATAATTCCTCTGCGT   | 21 | 7  |
| 10  | - | 2528 | TTGTTGAATAATTCCTCTGCG   | 21 | 8  |
| 5   | - | 2529 | ATTGTTGAATAATTCCTCTGC   | 21 | 9  |
| 39  | - | 2532 | ATGATTGTTGAATAATTCCTC   | 21 | 12 |
| 32  | - | 2533 | AATGATTGTTGAATAATTCCT   | 21 | 13 |
| 1   | - | 2534 | AATGATTGTTGAATAATTC     | 20 | 14 |
| 1   | - | 2536 | GAAAATGATTGTTGAATAATT   | 21 | 16 |
| 65  | - | 2537 | AGAAAATGATTGTTGAATAAT   | 21 | 17 |
| 68  | - | 2540 | ATGAGAAAATGATTGTTGAAT   | 21 | 20 |
| 143 | - | 2555 | TAAGGATGCCACCCATGAGA    | 21 | 14 |
| 9   | - | 2569 | AACTCTCTTCCAGGTAAGGAT   | 21 | 7  |
| 12  | - | 2574 | TGGGCAACTCTCTTCCAGGTA   | 21 | 12 |
| 4   | - | 2575 | CAGTGGGCAACTCTCTTCCAGGT | 23 | 13 |
| 15  | - | 2578 | TCAGTGGGCAACTCTCTTCCA   | 21 | 16 |
| 94  | - | 2580 | AGTCAGTGGGCAACTCTCTTC   | 21 | 18 |
| 8   | - | 2581 | AAGTCAGTGGGCAACTCTCTT   | 21 | 19 |
| 14  | - | 2582 | TAAGTCAGTGGGCAACTCTCT   | 21 | 20 |
| 5   | - | 2583 | ATAAGTCAGTGGGCAACTCTC   | 21 | 0  |
| 13  | - | 2584 | TATAAGTCAGTGGGCAACTCT   | 21 | 1  |
| 1   | - | 2589 | TCGGTGGTATAAGTCAGTGGGCA | 23 | 6  |
| 3   | - | 2589 | GGTGGTATAAGTCAGTGGGCA   | 21 | 6  |
| 8   | - | 2589 | CGGTGGTATAAGTCAGTGGGCA  | 22 | 6  |
| 11  | - | 2590 | CGGTGGTATAAGTCAGTGGGC   | 21 | 7  |
| 59  | - | 2590 | TCGGTGGTATAAGTCAGTGGGC  | 22 | 7  |
| 17  | - | 2591 | ATCGGTGGTATAAGTCAGTGGG  | 22 | 8  |
| 8   | - | 2594 | TAGATCGGTGGTATAAGTCAGT  | 22 | 11 |
| 20  | - | 2595 | TAGATCGGTGGTATAAGTCAG   | 21 | 12 |
| 16  | - | 2596 | GTAGATCGGTGGTATAAGTCA   | 21 | 13 |
| 19  | - | 2597 | GGTAGATCGGTGGTATAAGTC   | 21 | 14 |
| 3   | - | 2597 | CGGTAGATCGGTGGTATAAGTC  | 22 | 14 |
| 11  | - | 2603 | ATGTCCGGTAGATCGGTGGTA   | 21 | 20 |
| 54  | - | 2604 | AATGTCCGGTAGATCGGTGGT   | 21 | 0  |
| 11  | - | 2606 | TGGAATGTCCGGTAGATCGGTG  | 22 | 2  |
| 20  | - | 2607 | TGGAATGTCCGGTAGATCGGT   | 21 | 3  |
| 8   | - | 2607 | ATGGAATGTCCGGTAGATCGGT  | 22 | 3  |
| 5   | - | 2608 | ATGGAATGTCCGGTAGATCGG   | 21 | 4  |
| 5   | - | 2609 | TGATGGAATGTCCGGTAGATCG  | 22 | 5  |
| 49  | - | 2610 | TGATGGAATGTCCGGTAGATC   | 21 | 6  |
| 10  | - | 2615 | AACGGTGATGGAATGTCCGGT   | 21 | 11 |
| 2   | - | 2616 | CGAACGGTGATGGAATGTCCGG  | 22 | 12 |
| 4   | - | 2617 | CGAACGGTGATGGAATGTCCG   | 21 | 13 |
| 9   | - | 2620 | AGACGAACGGTGATGGAATGT   | 21 | 16 |

|     |   |      |                        |    |    |
|-----|---|------|------------------------|----|----|
| 8   | - | 2621 | CGAGACGAACGGTGATGGAATG | 22 | 17 |
| 13  | - | 2623 | TCGAGACGAACGGTGATGGAA  | 21 | 19 |
| 12  | - | 2624 | CTCGAGACGAACGGTGATGGA  | 21 | 20 |
| 10  | - | 2625 | CCTCGAGACGAACGGTGATGG  | 21 | 0  |
| 2   | - | 2625 | CCCTCGAGACGAACGGTGATGG | 22 | 0  |
| 3   | - | 2629 | TTGCCCTCGAGACGAACGGTG  | 21 | 4  |
| 12  | - | 2630 | CTTGCCCTCGAGACGAACGGT  | 21 | 5  |
| 21  | - | 2631 | TCTTGCCCTCGAGACGAACGG  | 21 | 6  |
| 2   | - | 2635 | GGAGTCTTGCCCTCGAGACGA  | 21 | 10 |
| 2   | - | 2638 | AAAGGAGTCTTGCCCTCGAGA  | 21 | 13 |
| 13  | - | 2639 | AAAAGGAGTCTTGCCCTCGAG  | 21 | 14 |
| 9   | - | 2643 | CAGAAAAAGGAGTCTTGCCCT  | 21 | 18 |
| 16  | - | 2647 | AATGCAGAAAAAGGAGTCTTG  | 21 | 1  |
| 8   | - | 2648 | GAATGCAGAAAAAGGAGTCTT  | 21 | 2  |
| 16  | - | 2650 | AAGAATGCAGAAAAAGGAGTC  | 21 | 4  |
| 12  | - | 2651 | AAGAATGCAGAAAAAGGAGT   | 20 | 5  |
| 41  | - | 2651 | CAAAGAATGCAGAAAAAGGAGT | 22 | 5  |
| 7   | - | 2652 | CAAAGAATGCAGAAAAAGGAG  | 21 | 6  |
| 16  | - | 2653 | CCAAAGAATGCAGAAAAAGGA  | 21 | 7  |
| 6   | - | 2656 | AATCCAAAGAATGCAGAAAA   | 21 | 10 |
| 3   | - | 2660 | CCTTAAATCCAAAGAATGCAGA | 22 | 14 |
| 1   | - | 2683 | TTAGGGGAAATCACGAGGAAA  | 21 | 16 |
| 16  | - | 2686 | TGGTTAGGGGAAATCACGAGG  | 21 | 19 |
| 11  | - | 2694 | TCAGCATCATGGTTAGGGGAAA | 22 | 6  |
| 1   | - | 2694 | CAGCATCATGGTTAGGGGAAA  | 21 | 6  |
| 4   | - | 2695 | TCAGCATCATGGTTAGGGGAA  | 21 | 7  |
| 34  | - | 2697 | TCTTCAGCATCATGGTTAGGGG | 22 | 9  |
| 5   | - | 2697 | CTTCAGCATCATGGTTAGGGG  | 21 | 9  |
| 42  | - | 2698 | TCTTCAGCATCATGGTTAGGG  | 21 | 10 |
| 3   | - | 2699 | TTTCTTCAGCATCATGGTTAGG | 22 | 11 |
| 6   | - | 2699 | TTCTTCAGCATCATGGTTAGG  | 21 | 11 |
| 2   | - | 2715 | AGGGAGAATTGCTAGTTTCTT  | 21 | 6  |
| 2   | - | 2717 | TAAGGGAGAATTGCTAGTTTC  | 21 | 8  |
| 3   | - | 2719 | AATAAGGGAGAATTGCTAGTT  | 21 | 10 |
| 5   | - | 2729 | TGCGAGGACAAAATAAGGGAGA | 22 | 20 |
| 1   | - | 2730 | ATGCGAGGACAAAATAAGGGAG | 22 | 0  |
| 281 | - | 2731 | ATGCGAGGACAAAATAAGGGA  | 21 | 1  |
| 2   | - | 2731 | TGCGAGGACAAAATAAGGGA   | 20 | 1  |
| 31  | - | 2732 | AATGCGAGGACAAAATAAGGG  | 21 | 2  |
| 3   | - | 2732 | CAATGCGAGGACAAAATAAGGG | 22 | 2  |
| 1   | - | 2746 | CAACCGATTTTGCCAATGCGA  | 21 | 16 |
| 11  | - | 2761 | GTTTCGTCATCGGAGCAACCG  | 21 | 10 |
| 15  | - | 2765 | AGGTGTTTCGTCATCGGAGCA  | 21 | 14 |
| 24  | - | 2766 | ATAGGTGTTTCGTCATCGGAGC | 22 | 15 |



|    |   |      |                        |    |    |
|----|---|------|------------------------|----|----|
| 7  | - | 2766 | TAGGTGTTTCGTCATCGGAGC  | 21 | 15 |
| 24 | - | 2768 | AATAGGTGTTTCGTCATCGGA  | 21 | 17 |
| 17 | - | 2772 | TATAAATAGGTGTTTCGTCAT  | 21 | 0  |
| 3  | - | 2773 | ATATAAATAGGTGTTTCGTC   | 21 | 1  |
| 3  | - | 2774 | AATATAAATAGGTGTTTCGTC  | 21 | 2  |
| 3  | - | 2782 | TTGGGGATAATATAAATAGGT  | 21 | 10 |
| 50 | - | 2796 | TGTTCTGCTCGAGGTTTGGGGA | 22 | 3  |
| 12 | - | 2797 | TGTTCTGCTCGAGGTTTGGGG  | 21 | 4  |
| 34 | - | 2798 | ATGTTCTGCTCGAGGTTTGGG  | 21 | 5  |
| 36 | - | 2798 | GATGTTCTGCTCGAGGTTTGGG | 22 | 5  |
| 2  | - | 2799 | AGATGTTCTGCTCGAGGTTTGG | 22 | 6  |
| 6  | - | 2801 | TAGATGTTCTGCTCGAGGTTT  | 21 | 8  |
| 1  | - | 2803 | CTAGATGTTCTGCTCGAGGT   | 20 | 10 |
| 54 | - | 2803 | ACTAGATGTTCTGCTCGAGGT  | 21 | 10 |
| 2  | - | 2804 | CTAGATGTTCTGCTCGAGG    | 19 | 11 |
| 2  | - | 2804 | TAAGTAGATGTTCTGCTCGAGG | 22 | 11 |
| 2  | - | 2805 | TAAGTAGATGTTCTGCTCGAG  | 21 | 12 |
| 14 | - | 2814 | AGTGAAACATAACTAGATGTT  | 21 | 0  |
| 1  | - | 2820 | AGAGTGAAACATAACTA      | 17 | 6  |
| 3  | - | 2820 | AGTCAGAGTGAAACATAACTA  | 21 | 6  |
| 11 | - | 2821 | CAAGTCAGAGTGAAACATAACT | 22 | 7  |
| 4  | - | 2824 | TGCAAGTCAGAGTGAAACATA  | 21 | 10 |
| 2  | - | 2829 | TGTTATGCAAGTCAGAGTGAA  | 21 | 15 |
| 11 | - | 2830 | TTGTTATGCAAGTCAGAGTGA  | 21 | 16 |
| 81 | - | 2834 | TTCCTTGTTATGCAAGTCAGA  | 21 | 20 |
| 3  | - | 2859 | TCTCGTTGCCTACTTCATGAC  | 21 | 3  |
| 2  | - | 2860 | ATCTCGTTGCCTACTTCATGA  | 21 | 4  |
| 27 | - | 2863 | CAGTATCTCGTTGCCTACTTCA | 22 | 7  |
| 65 | - | 2866 | AACAGTATCTCGTTGCCTACT  | 21 | 10 |
| 16 | - | 2868 | CAAACAGTATCTCGTTGCCTA  | 21 | 12 |
| 4  | - | 2868 | AAACAGTATCTCGTTGCCTA   | 20 | 12 |
| 5  | - | 2870 | TTCAAACAGTATCTCGTTGCC  | 21 | 14 |
| 7  | - | 2880 | TGTTGCTGAATCAAACAGTA   | 21 | 3  |
| 44 | - | 2891 | GGTGTCCGATATGTTGCTGAA  | 21 | 14 |
| 30 | - | 2892 | AGGTGTCCGATATGTTGCTGA  | 21 | 15 |
| 47 | - | 2892 | TAGGTGTCCGATATGTTGCTGA | 22 | 15 |
| 18 | - | 2893 | TAGGTGTCCGATATGTTGCTG  | 21 | 16 |
| 15 | - | 2894 | ATAGGTGTCCGATATGTTGCT  | 21 | 17 |
| 33 | - | 2894 | TAGGTGTCCGATATGTTGCT   | 20 | 17 |
| 6  | - | 2894 | CATAGGTGTCCGATATGTTGCT | 22 | 17 |
| 10 | - | 2895 | TCATAGGTGTCCGATATGTTGC | 22 | 18 |
| 10 | - | 2896 | TAGGTGTCCGATATGTTG     | 18 | 19 |
| 14 | - | 2896 | TCATAGGTGTCCGATATGTTG  | 21 | 19 |
| 30 | - | 2897 | TCTCATAGGTGTCCGATATGTT | 22 | 20 |

|     |   |      |                          |    |    |
|-----|---|------|--------------------------|----|----|
| 1   | - | 2899 | ATCTCATAGGTGTCGGATATG    | 21 | 1  |
| 19  | - | 2901 | ATAATCTCATAGGTGTCGGATA   | 22 | 3  |
| 41  | - | 2904 | CAATAATCTCATAGGTGTCGG    | 21 | 6  |
| 39  | - | 2906 | CTCAATAATCTCATAGGTGTC    | 21 | 8  |
| 2   | - | 2909 | ACACTCAATAATCTCATAGGT    | 21 | 11 |
| 7   | - | 2924 | ATAGAATCTGACACCACACTC    | 21 | 5  |
| 1   | - | 2930 | ATCTGTATAGAATCTGACACC    | 21 | 11 |
| 7   | - | 2935 | TGTTTCATCTGTATAGAATCTG   | 21 | 16 |
| 3   | - | 2943 | ATTTACCTGTTTCATCTGTAT    | 21 | 3  |
| 4   | - | 2946 | CTGATTTACCTGTTTCATCTG    | 21 | 6  |
| 2   | - | 2952 | CTTTCACTGATTTACCTGTT     | 21 | 12 |
| 6   | - | 2953 | CCTTTCACTGATTTACCTGT     | 21 | 13 |
| 45  | - | 2958 | TTTCTCCTTTCACTGATTCA     | 21 | 18 |
| 59  | - | 2962 | TTCATTTCTCCTTTCACTGAT    | 21 | 1  |
| 19  | - | 2965 | CATATTCATTTCTCCTTTCACT   | 22 | 4  |
| 27  | - | 2983 | ACAAACTTGGTCTATTTTCATA   | 21 | 1  |
| 4   | - | 2986 | TTCACAAACTTGGTCTATTTTC   | 21 | 4  |
| 3   | - | 2987 | TCTTCACAAACTTGGTCTATTT   | 22 | 5  |
| 1   | - | 2988 | TCTTCACAAACTTGGTCTATT    | 21 | 6  |
| 12  | - | 2989 | ATCTTCACAAACTTGGTCTAT    | 21 | 7  |
| 15  | - | 2992 | TTCATCTTCACAAACTTGGTC    | 21 | 10 |
| 5   | - | 2992 | TTTCATCTTCACAAACTTGGTC   | 22 | 10 |
| 11  | - | 2993 | TTTCATCTTCACAAACTTGGT    | 21 | 11 |
| 12  | - | 3007 | ATAGCTCCAATCGTTTTTCATC   | 21 | 4  |
| 9   | - | 3007 | CATAGCTCCAATCGTTTTTCATC  | 22 | 4  |
| 11  | - | 3013 | AAACTCATAGCTCCAATCGTT    | 21 | 10 |
| 13  | - | 3014 | CAAACCTCATAGCTCCAATCGT   | 21 | 11 |
| 7   | - | 3037 | GCATTCCAATGCTTCCACGGG    | 21 | 13 |
| 13  | - | 3058 | ATTATGTCCATTATTTTTAGA    | 21 | 13 |
| 172 | - | 3083 | CGTTCGAAGTACAGATTAGGC    | 21 | 17 |
| 1   | - | 3097 | TTCGATCTTGCTTCGTTTTCGA   | 21 | 10 |
| 4   | - | 3099 | GGCTTCGATCTTGCTTCGTTTC   | 22 | 12 |
| 21  | - | 3104 | TGTTGGCTTCGATCTTGTCTT    | 21 | 17 |
| 2   | - | 3105 | TTTGTTGGCTTCGATCTTGTCT   | 22 | 18 |
| 1   | - | 3106 | ATTTGTTGGCTTCGATCTTGTCT  | 22 | 19 |
| 8   | - | 3107 | TGTTGGCTTCGATCTTGT       | 18 | 20 |
| 25  | - | 3109 | GTATTTGTTGGCTTCGATCTT    | 21 | 1  |
| 52  | - | 3112 | ATCTGTGTATTTGTTGGCTTCGAT | 24 | 4  |
| 10  | - | 3115 | ATCTGTGTATTTGTTGGCTTC    | 21 | 7  |
| 6   | - | 3115 | AATCTGTGTATTTGTTGGCTTC   | 22 | 7  |
| 14  | - | 3118 | ACAATCTGTGTATTTGTTGGC    | 21 | 10 |
| 2   | - | 3128 | GCCAACTCCAACAATCTGTGT    | 21 | 20 |
| 1   | - | 3142 | AAAACAGATGATGAGCCAACCT   | 21 | 13 |
| 4   | - | 3153 | ATGGGAGACATCAAAACAGATG   | 22 | 3  |

|    |   |      |                        |    |    |
|----|---|------|------------------------|----|----|
| 11 | - | 3155 | TATGGGAGACATCAAAACAGA  | 21 | 5  |
| 1  | - | 3186 | TCCCCAAACTAAACTTCCGATG | 22 | 15 |
| 3  | - | 3202 | CTTCTCTCATCTTCCTCCCA   | 21 | 10 |
| 3  | - | 3245 | TGCAAATTCGTTGACTTCTC   | 21 | 11 |
| 3  | - | 3246 | TTGCAAATTCGTTGACTTCT   | 21 | 12 |
| 1  | - | 3249 | TCACTTGCAAATTCGTTGACT  | 22 | 15 |
| 3  | - | 3250 | TCACTTGCAAATTCGTTGAC   | 21 | 16 |

Note: Reads (#) indicate the copy number of the sepcific small RNA in column D5. The "+" strand indicates the same orientation of smal RNA as that of At5G38850 whereas a "-" indicates the reverse strand. Register is the position (column C) module 21.
